# Supplementary material for: Copper-mediated cyanation of indoles and electron-rich arenes using DMF as a single surrogate
Source: Royal Society of Chemistry journal article supplement (doi:10.1039/c5ob01244a), 2015-01-01
Supplement: c5ob01244a1.pdf [file c5ob01244a1.pdf]

# Supporting Information for

## Copper-Mediated Cyanations of Indoles and Electron-Rich Arenes Using DMF as a Single Surrogate

*Lianpeng Zhang, Ping Lu\*, and Yanguang Wang\**

*Department of Chemistry, Zhejiang University, Hangzhou 310027, P. R. China*

*E-mail: [pinglu@zju.edu.cn](mailto:pinglu@zju.edu.cn); [orgwyg@zju.edu.cn](mailto:orgwyg@zju.edu.cn).*

### Table of Contents

1. **Table S1** Screening of the reaction conditions for cyanation of **3a**
2. Experiment using DMF with Carbon-13 Labeled on Its Carbonyl
3. Experiment using 1H-Indole-3-Carbaldehyde with Carbon-13 Labeled on Its Carbonyl
4. HPLC Tracking of the Reaction Process of 1H-Indole
5. Figure S1 CuI-mediated cyanation of **1a** using DMF
6. Copies of <sup>1</sup>H NMR and <sup>13</sup>C NMR for All Products
7. Copies of HRMS for **2l**, **2q**, **2t**, **5c** and **5d**

### 1. Table S1 Screening of the reaction conditions for cyanation of **3a**<sup>a</sup>

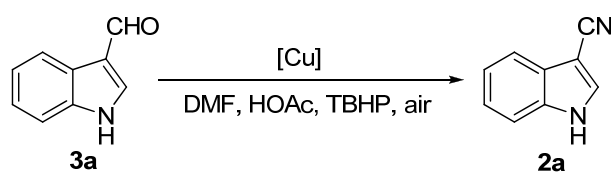

| entry | [Cu] (equiv)                                               | HOAc (equiv) | TBHP (equiv) | Temp (°C) | Yield (%) <sup>b</sup> |
|-------|------------------------------------------------------------|--------------|--------------|-----------|------------------------|
| 1     | CuI (1.2)                                                  | 8            | 2            | 130       | 31                     |
| 2     | CuBr (1.2)                                                 | 8            | 2            | 130       | 36                     |
| 3     | CuCl (1.2)                                                 | 8            | 2            | 130       | 25                     |
| 4     | Cu <sub>2</sub> O (1.2)                                    | 8            | 2            | 130       | 50                     |
| 5     | CuBr <sub>2</sub> (1.2)                                    | 8            | 2            | 130       | 10                     |
| 6     | Cu(OAc) <sub>2</sub> (1.2)                                 | 8            | 2            | 130       | 51                     |
| 7     | CuSO <sub>4</sub> (1.2)                                    | 8            | 2            | 130       | 35                     |
| 8     | Cu(NO <sub>3</sub> ) <sub>2</sub> ·3H <sub>2</sub> O (1.2) | 8            | 2            | 130       | 70                     |
| 9     | CuCl <sub>2</sub> ·2H <sub>2</sub> O (1.2)                 | 8            | 2            | 130       | 28                     |
| 10    | CuO (1.2)                                                  | 8            | 2            | 130       | 17                     |
| 11    | Cu(OTf) <sub>2</sub> (1.2)                                 | 8            | 2            | 130       | 31                     |
| 12    | Cu (1.2)                                                   | 8            | 2            | 130       | 25                     |
| 13    | Cu(NO <sub>3</sub> ) <sub>2</sub> ·3H <sub>2</sub> O (0.5) | 8            | 2            | 130       | 45                     |
| 14    | Cu(NO <sub>3</sub> ) <sub>2</sub> ·3H <sub>2</sub> O (1.0) | 8            | 2            | 130       | 74                     |
| 15    | Cu(NO <sub>3</sub> ) <sub>2</sub> ·3H <sub>2</sub> O (1.5) | 8            | 2            | 130       | 69                     |
| 16    | Cu(NO <sub>3</sub> ) <sub>2</sub> ·3H <sub>2</sub> O (1.0) | 12           | 2            | 130       | 70                     |
| 17    | Cu(NO <sub>3</sub> ) <sub>2</sub> ·3H <sub>2</sub> O (1.0) | 4            | 2            | 130       | 51                     |
| 18    | Cu(NO <sub>3</sub> ) <sub>2</sub> ·3H <sub>2</sub> O (1.0) | —            | 2            | 130       | 40                     |
| 19    | Cu(NO <sub>3</sub> ) <sub>2</sub> ·3H <sub>2</sub> O (1.0) | 8            | 3            | 130       | 73                     |
| 20    | Cu(NO <sub>3</sub> ) <sub>2</sub> ·3H <sub>2</sub> O (1.0) | 8            | 1            | 130       | 46                     |
| 21    | Cu(NO <sub>3</sub> ) <sub>2</sub> ·3H <sub>2</sub> O (1.0) | 8            | —            | 130       | 45                     |
| 22    | Cu(NO <sub>3</sub> ) <sub>2</sub> ·3H <sub>2</sub> O (1.0) | 8            | 2            | 120       | 61                     |
| 23    | Cu(NO <sub>3</sub> ) <sub>2</sub> ·3H <sub>2</sub> O (1.0) | 8            | 2            | 140       | 70                     |
| 24    | Cu(NO <sub>3</sub> ) <sub>2</sub> ·3H <sub>2</sub> O (1.0) | 8            | 2            | 130       | 21 <sup>c</sup>        |

<sup>a</sup> Reaction conditions: **3a** (0.5 mmol), [Cu] source, HOAc, TBHP, DMF (3 mL), air. <sup>b</sup> Yield of isolated product after column chromatography on silica gel. <sup>c</sup> Dry N<sub>2</sub> atmosphere.

## 2. Experiment using DMF with Carbon-13 Labeled on Its Carbonyl

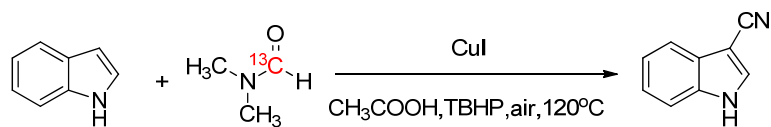

An oven-dried 25 mL eggplant-shaped bottle equipped with a magnetic stir bar was charged with CuI (0.24 mmol, 1.2 equiv), 1H-indole (23.4 mg, 0.2 mmol), HOAc (4.0 equiv), t-BuOOH (2.0 equiv, 70% aq.) and DMF with carbon-13 labeled on its carbonyl (0.25 mL). The bottle was left at 120 °C (oil bath temperature) for 48 h afforded 7.4 mg (26%) of 1H-indole-3-carbonitrile.

RawMode:Single 5.573(1613) BasePeak:142.10(997971)  
BG Mode:5.560(1609) Group 1 - Event 1

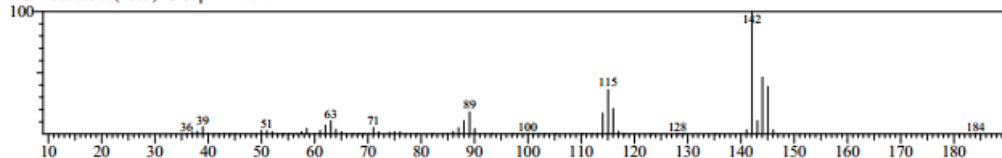

Hit#:1 Entry:11900 Library:NIST05.LIB  
SI:82 Formula:C9H6N2 CAS:5457-28-3 MolWeight:142 RetIndex:1509  
CompName:3-Indolecarbonitrile SS Indole-3-carbonitrile SS 3-Cyanoindole SS 1H-Indole-3-carbonitrile # SS

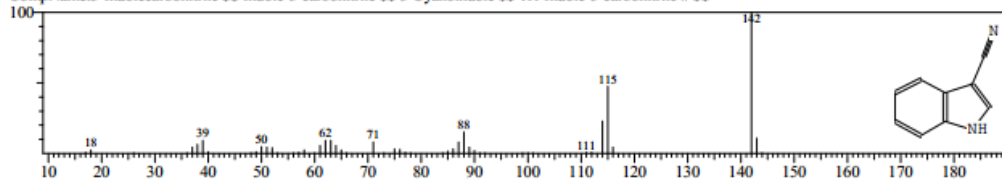

### 3. Experiment using 1H-Indole-3-Carbaldehyde with Carbon-13 Labeled on Its Carbonyl

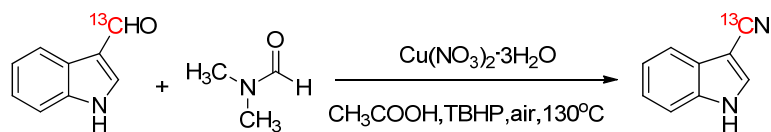

An oven-dried 25 mL eggplant-shaped bottle equipped with a magnetic stir bar was charged with  $\text{Cu}(\text{NO}_3)_2 \cdot 3\text{H}_2\text{O}$  (0.24 mmol, 1.2 equiv), 1H-indole-3-carbaldehyde with carbon-13 labeled on its carbonyl (29.2 mg, 0.2 mmol), HOAc (8.0 equiv), t-BuOOH (2.0 equiv, 70% aq.) and DMF (1.2 mL). The bottle was left at 130 °C (oil bath temperature) for 48 h afforded 9.0 mg (32%) of 1H-indole-3-carbonitrile with carbon-13 labeled on its carbonyl. HRMS  $m/z$  (ESI) calcd. for  $\text{C}_9\text{H}_6\text{N}_2$ .  $[\text{M}]^+$ , 143.0531; found, 143.0603.

RawMode:Single 5.733(1121) BasePeak:143.10(382782)  
 BG Mode:5.677(1104) Group 1 - Event 1

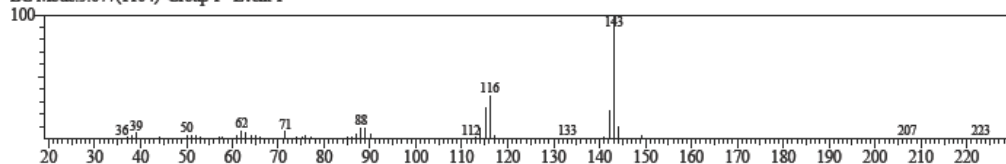

#### Elemental Composition Report

Page 1

Tolerance = 5.0 mDa / DBE: min = -1.5, max = 50.0  
 Element prediction: Off

Monoisotopic Mass, Odd and Even Electron Ions  
 7 formula(e) evaluated with 1 results within limits (up to 70 best isotopic matches for each mass)  
 Elements Used:  
 C: 0-50 H: 0-100 N: 0-2  
 GCT Premier ZJU  
 TOF MS EI+

30-Jan-2015

zlp143 1041 (4.771)

3.97e+002

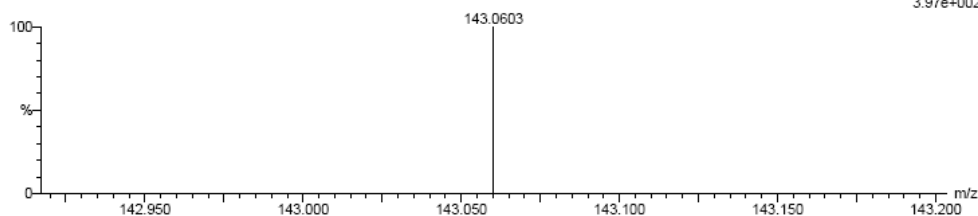

| Mass     | Calc. Mass | mDa  | PFM  | DBE | i-FIT     | Formula  |
|----------|------------|------|------|-----|-----------|----------|
| 143.0603 | 143.0609   | -0.6 | -4.2 | 7.5 | 5546181.0 | C9 H7 N2 |

#### 4. HPLC Tracking of the Reaction Process of 1H-Indole

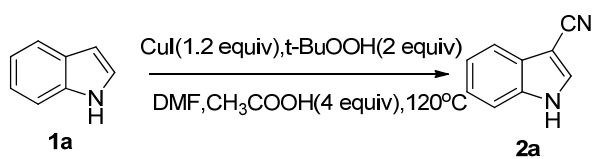

A flame-dried 25 mL eggplant-shaped bottle equipped with a magnetic stir bar was charged with CuI (0.6 mmol, 1.2 equiv) and **1a** (0.5 mmol), CH<sub>3</sub>COOH (4.0 equiv), t-BuOOH (2.0 equiv, 70% aq.) and DMF (3.0 mL). The bottle was left at 120 °C (oil bath temperature). Every once in a while, we took 10 μl sample from the reaction mixture and the samples were analyzed by HPLC.

#### 5. Figure S1 CuI-mediated cyanation of 1a using DMF

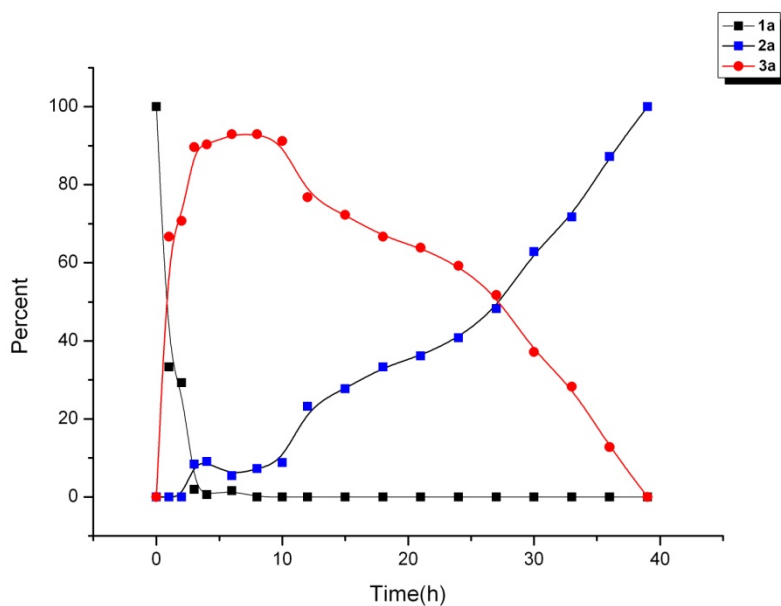

HPLC conditions: MeOH:H<sub>2</sub>O = 50:50; UV (254 nm) detector; 0.8 mL/min.

## 6. Copies of $^1\text{H}$ NMR and $^{13}\text{C}$ NMR for All Products

$^1\text{H}$ -NMR spectrum of **2a**

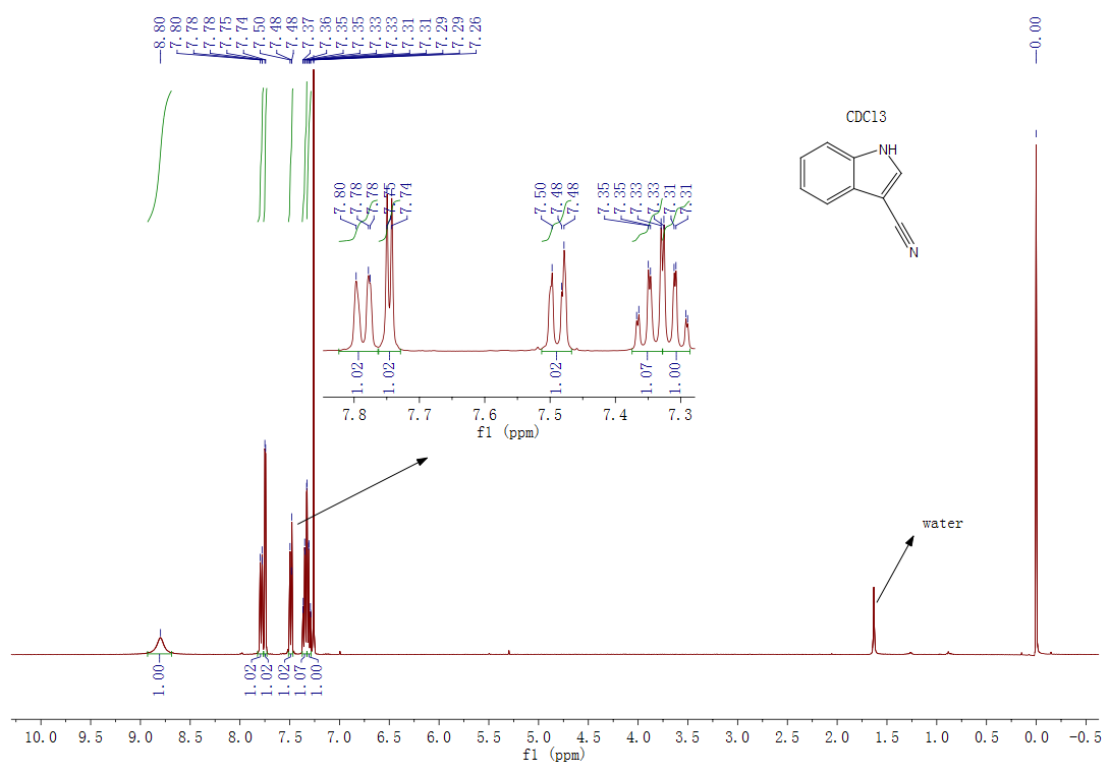

$^{13}\text{C}$ -NMR spectrum of **2a**

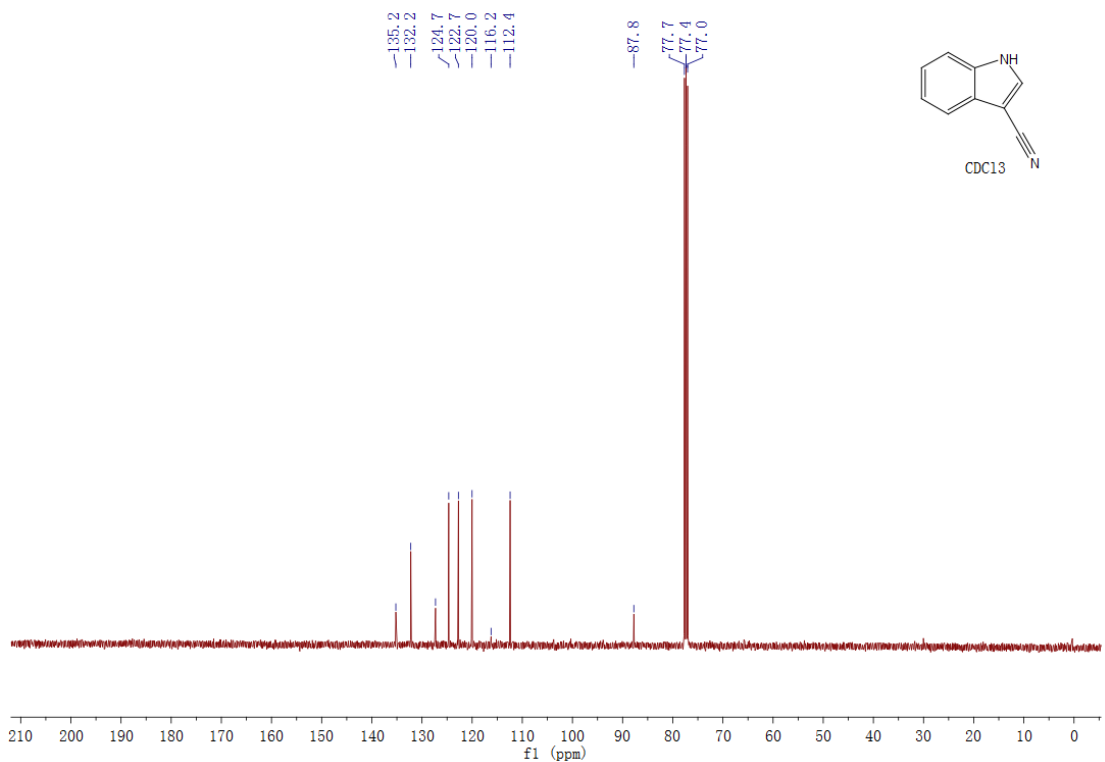

<sup>1</sup>H-NMR spectrum of **2b**

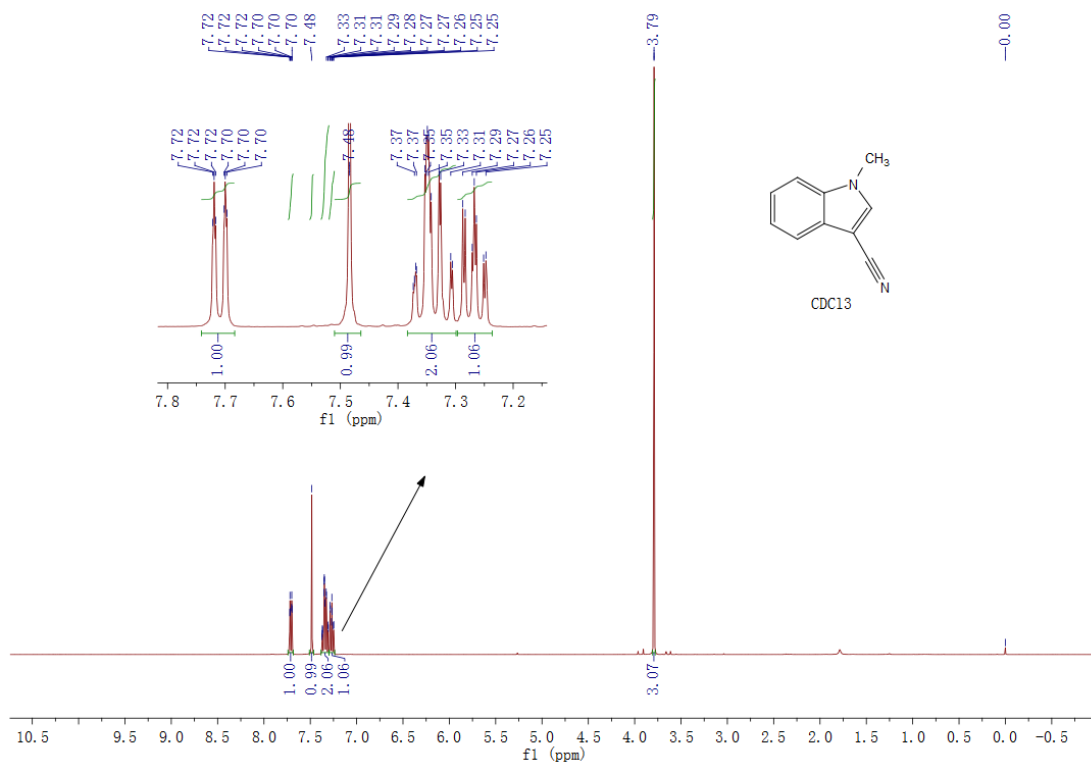

<sup>13</sup>C-NMR spectrum of **2b**

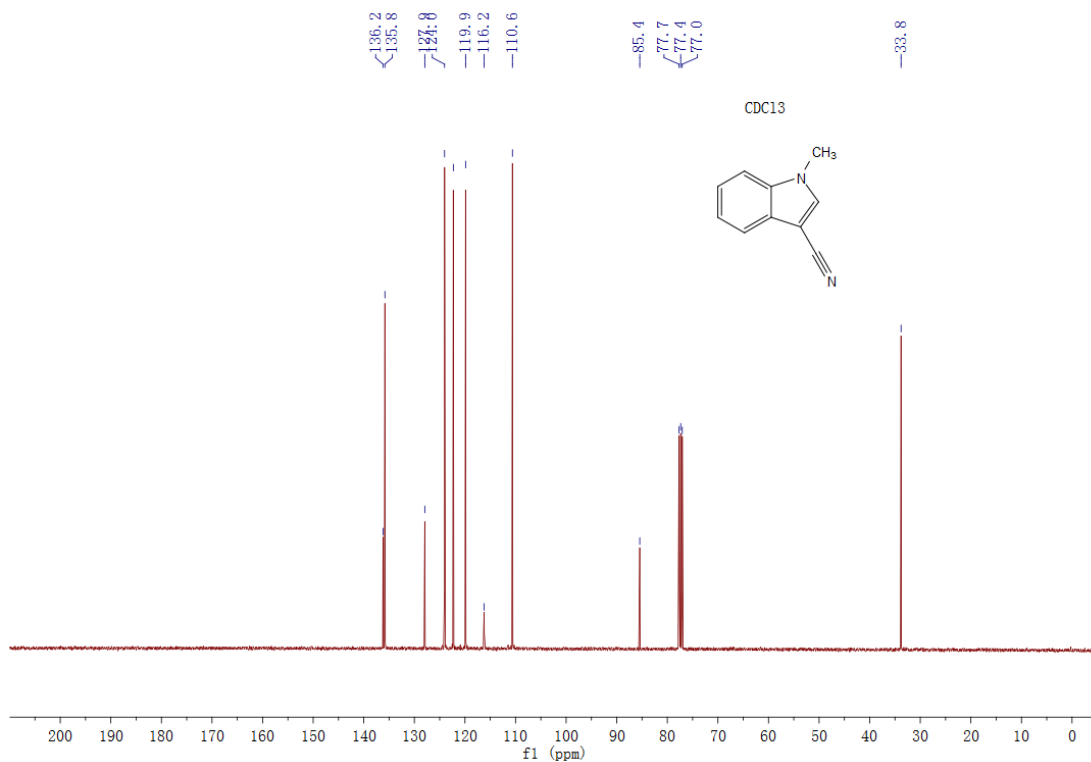

<sup>1</sup>H-NMR spectrum of **2c**

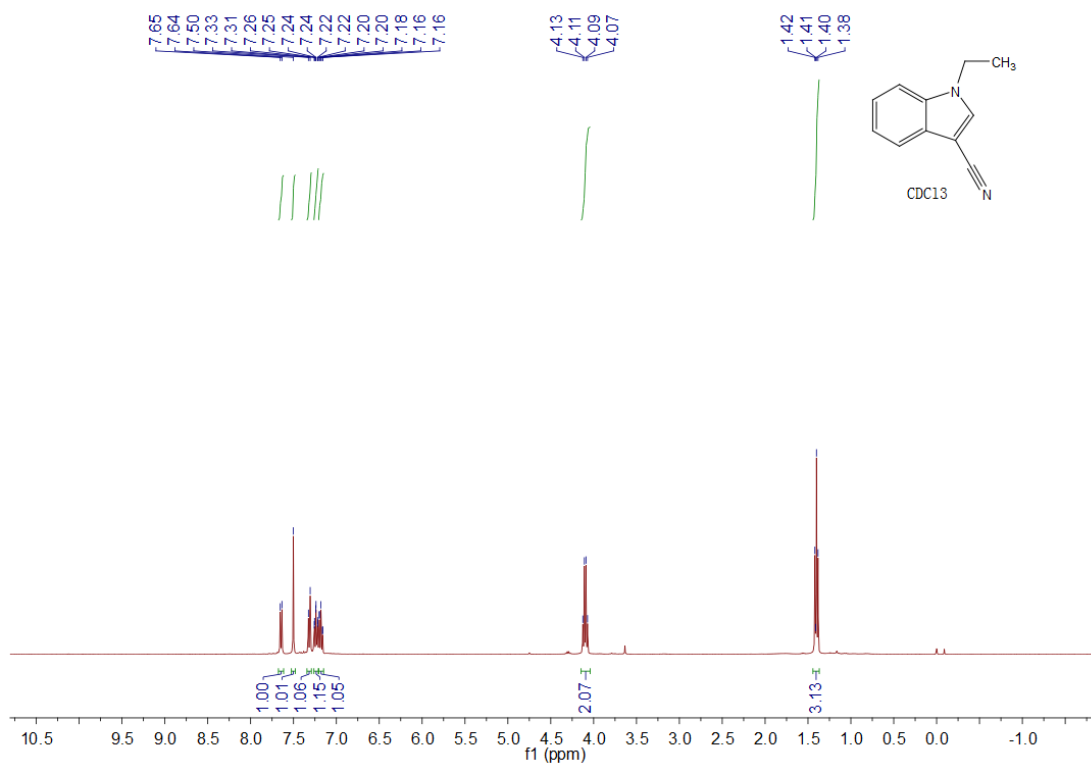

<sup>13</sup>C-NMR spectrum of **2c**

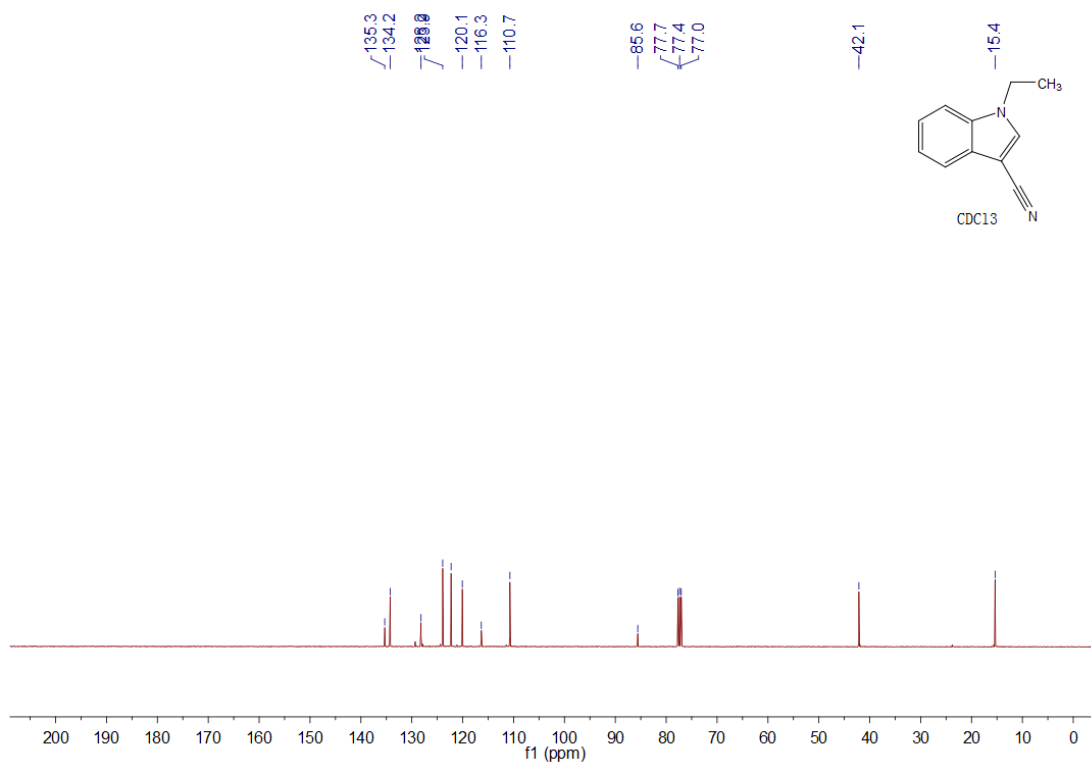



### <sup>1</sup>H-NMR spectrum of **2d**

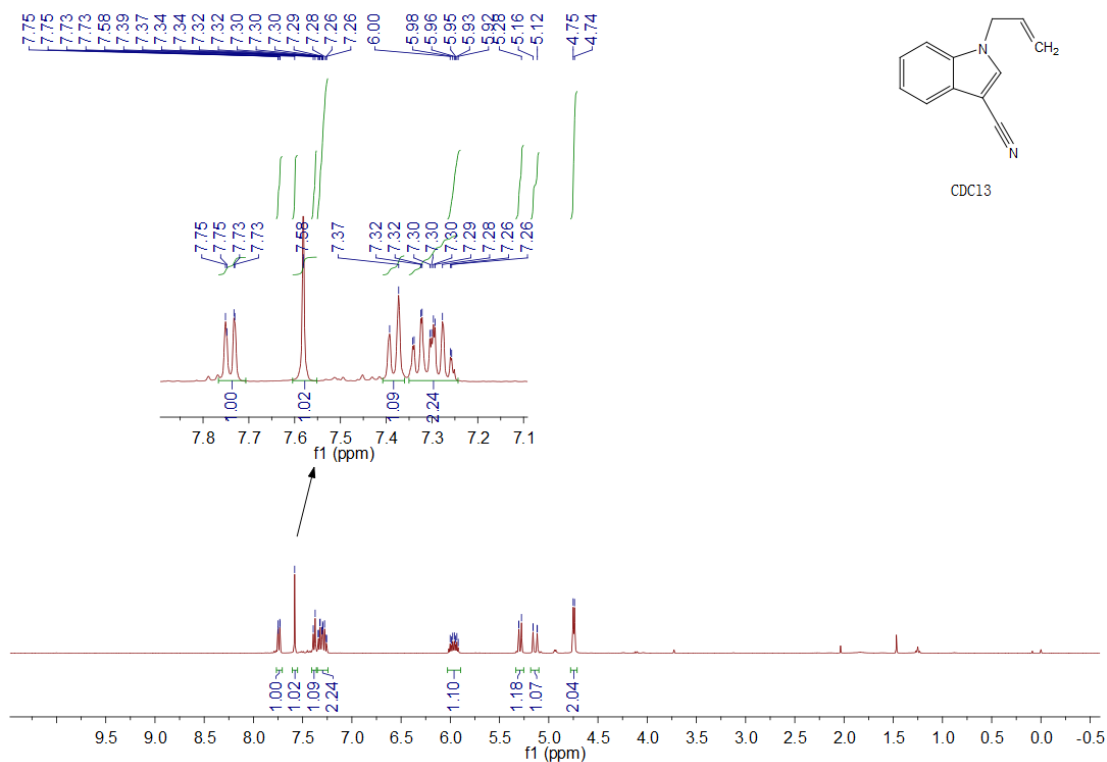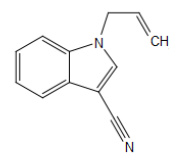

CDCl<sub>3</sub>

### <sup>13</sup>C-NMR spectrum of **2d**

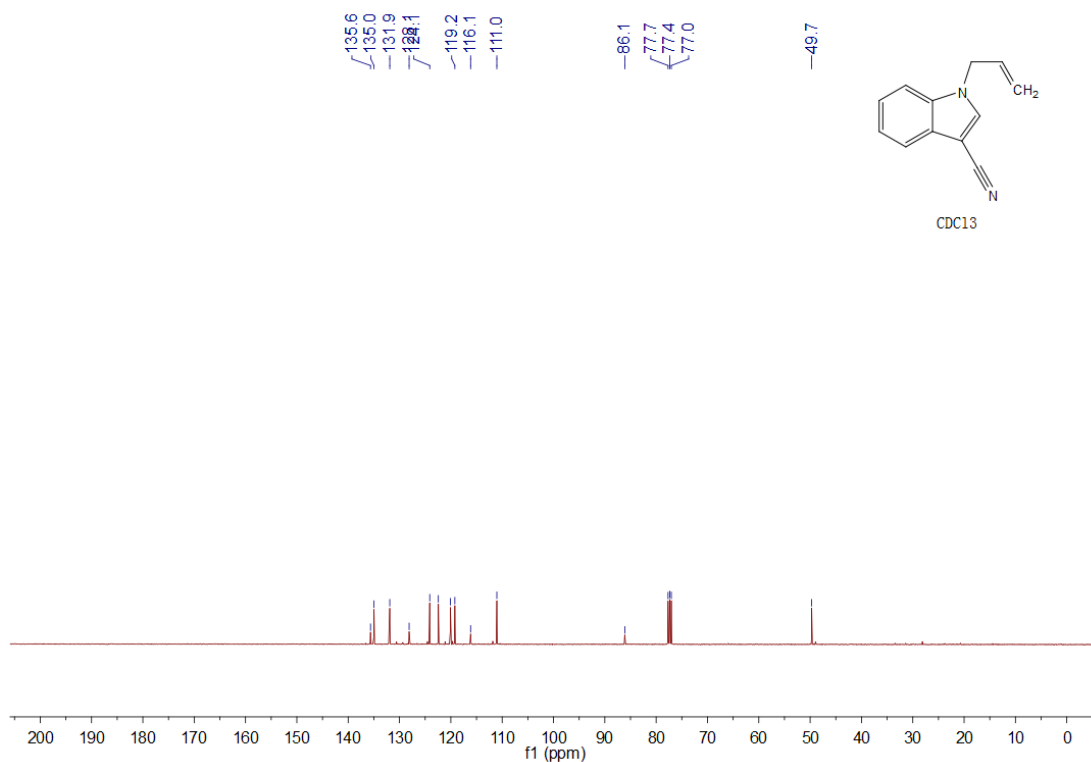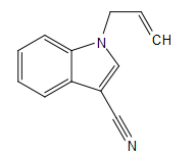

CDCl<sub>3</sub>

<sup>1</sup>H-NMR spectrum of **2e**

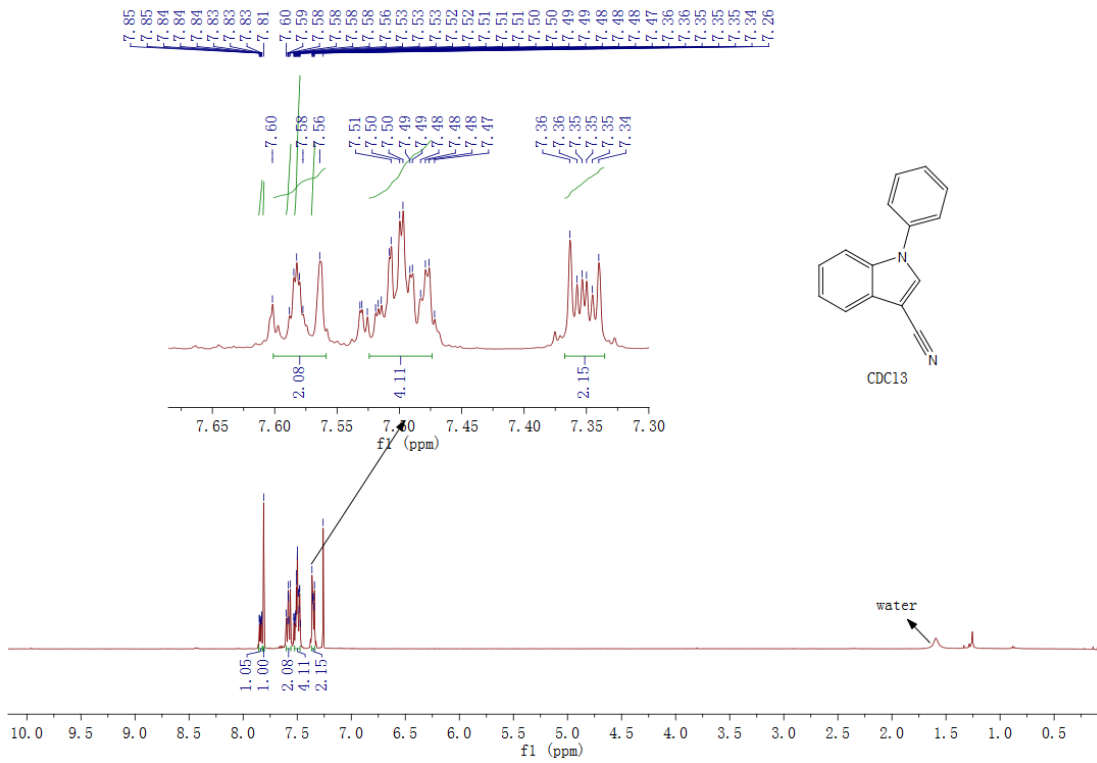

<sup>13</sup>C-NMR spectrum of **2e**

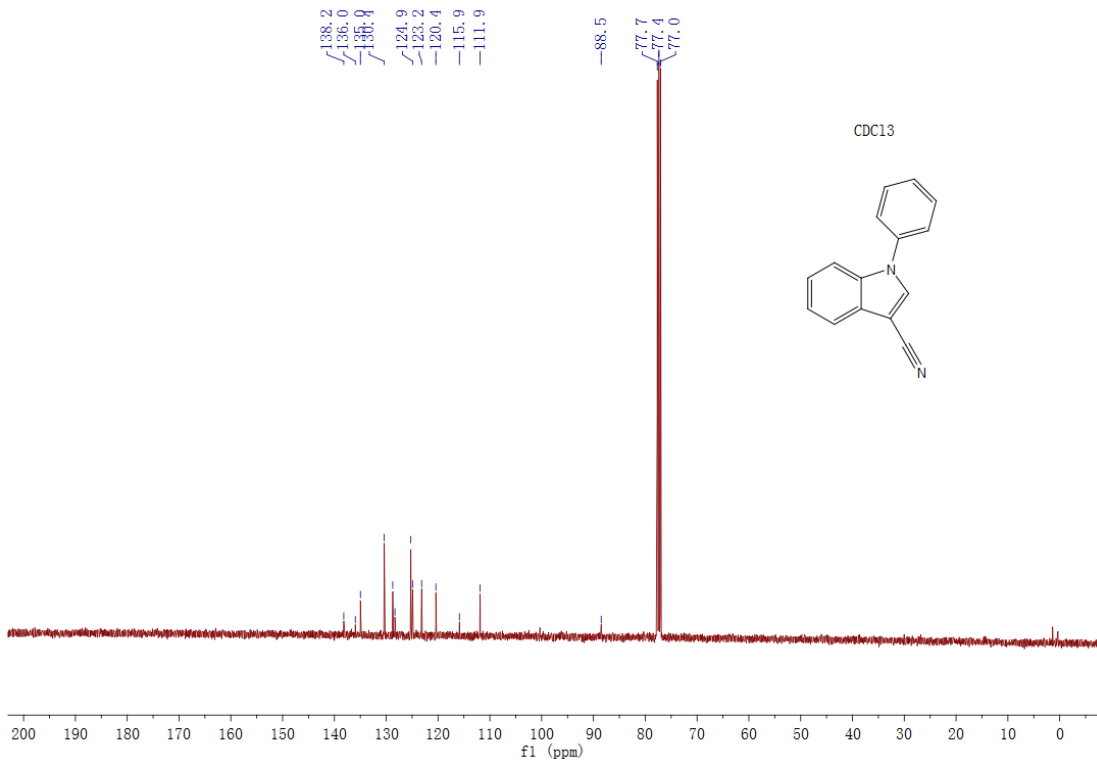

<sup>1</sup>H-NMR spectrum of **2f**

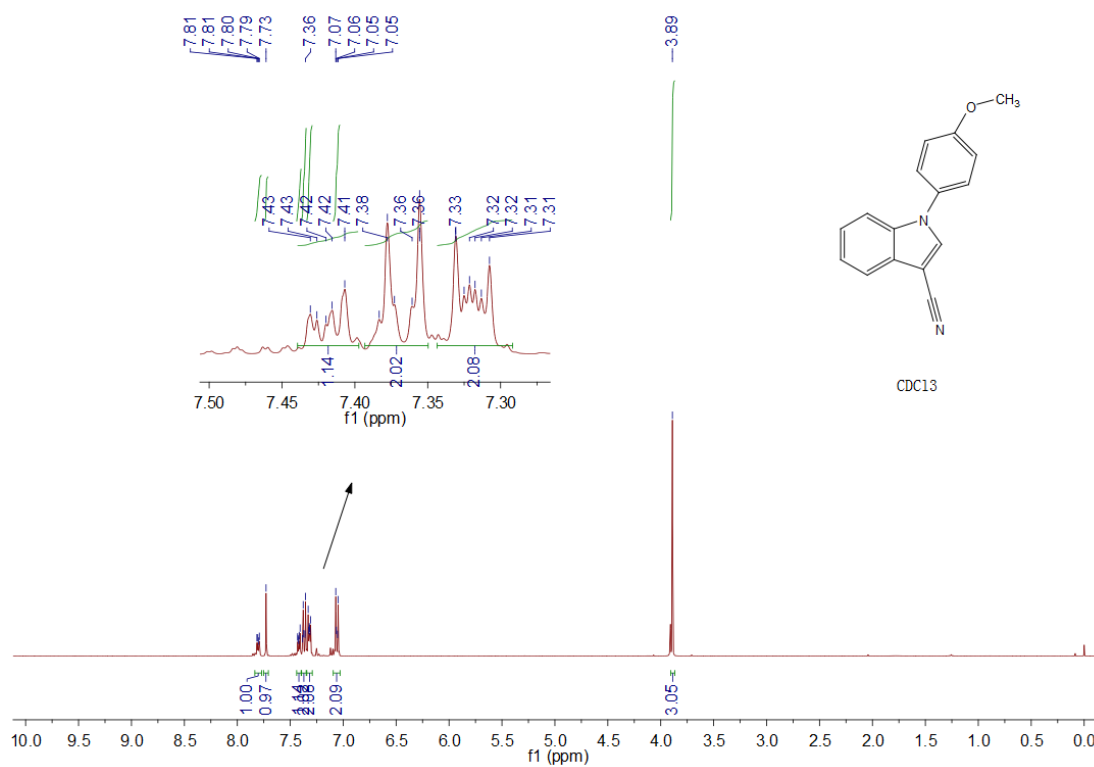

<sup>13</sup>C-NMR spectrum of **2f**

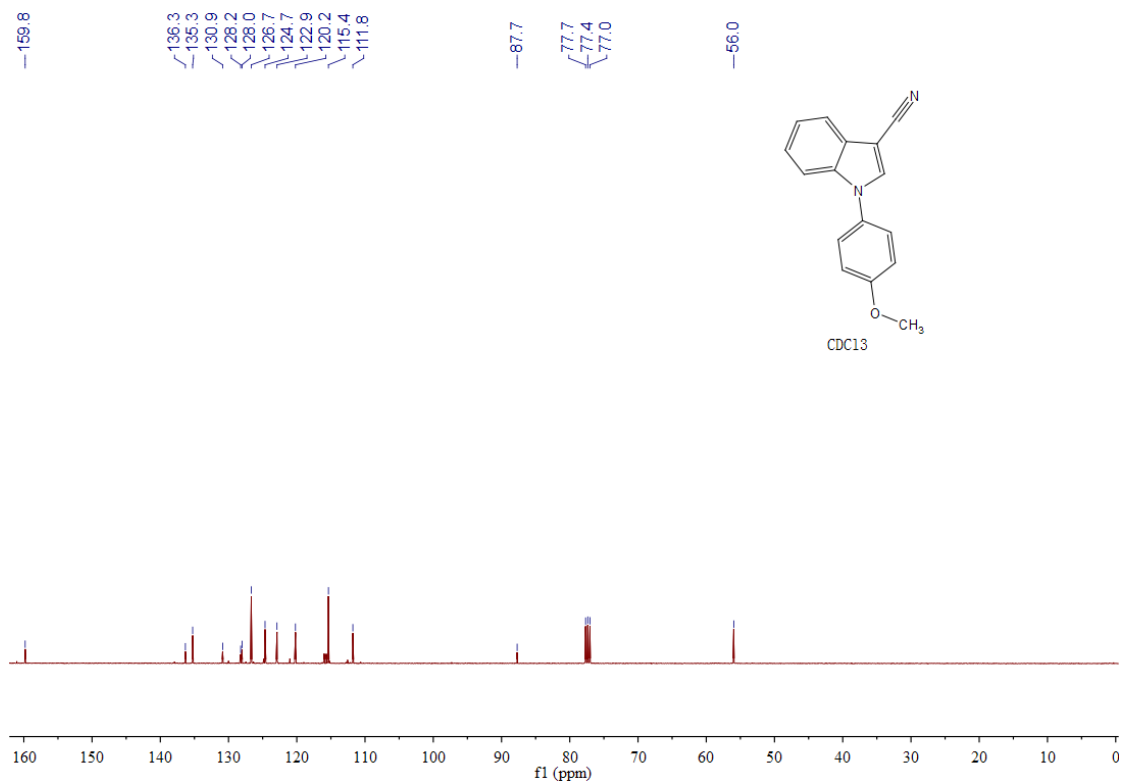

<sup>1</sup>H-NMR spectrum of **2g**

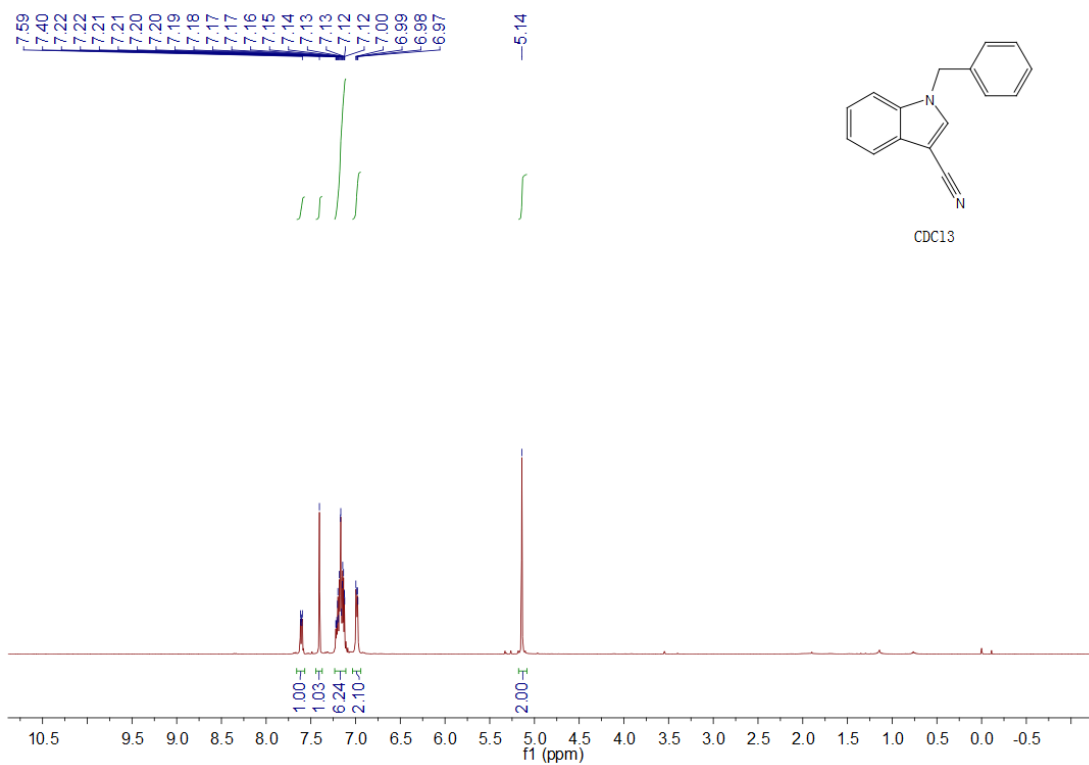

<sup>13</sup>C-NMR spectrum of **2g**

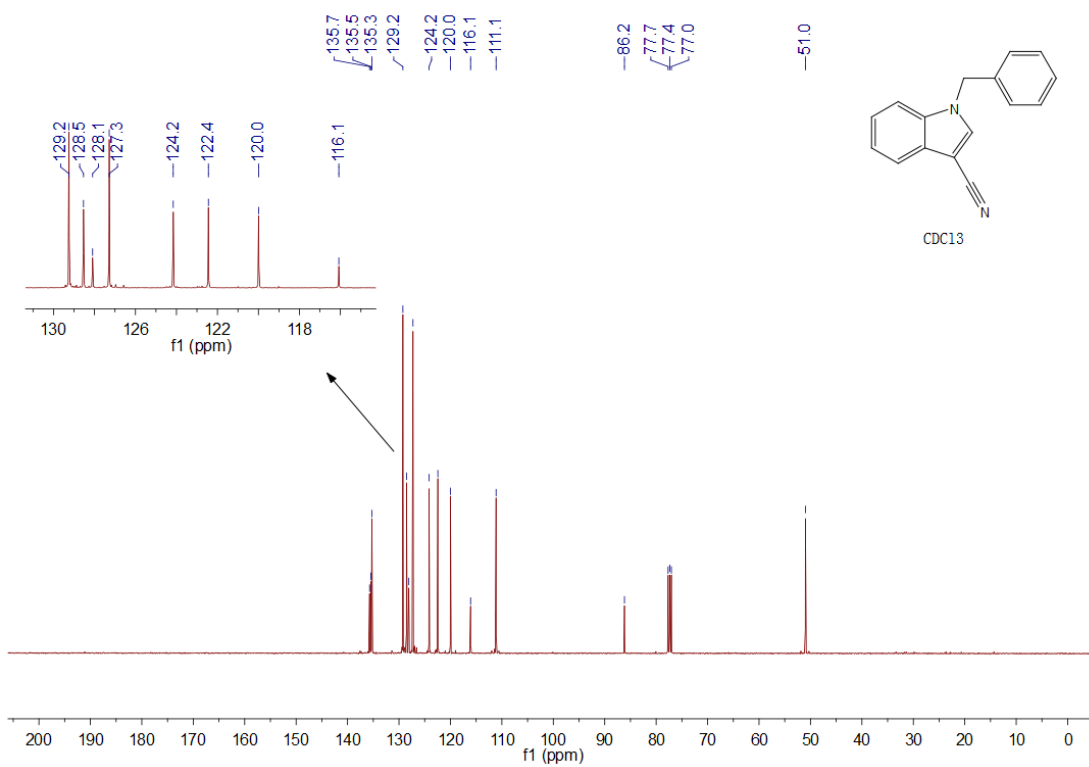

<sup>1</sup>H-NMR spectrum of **2h**

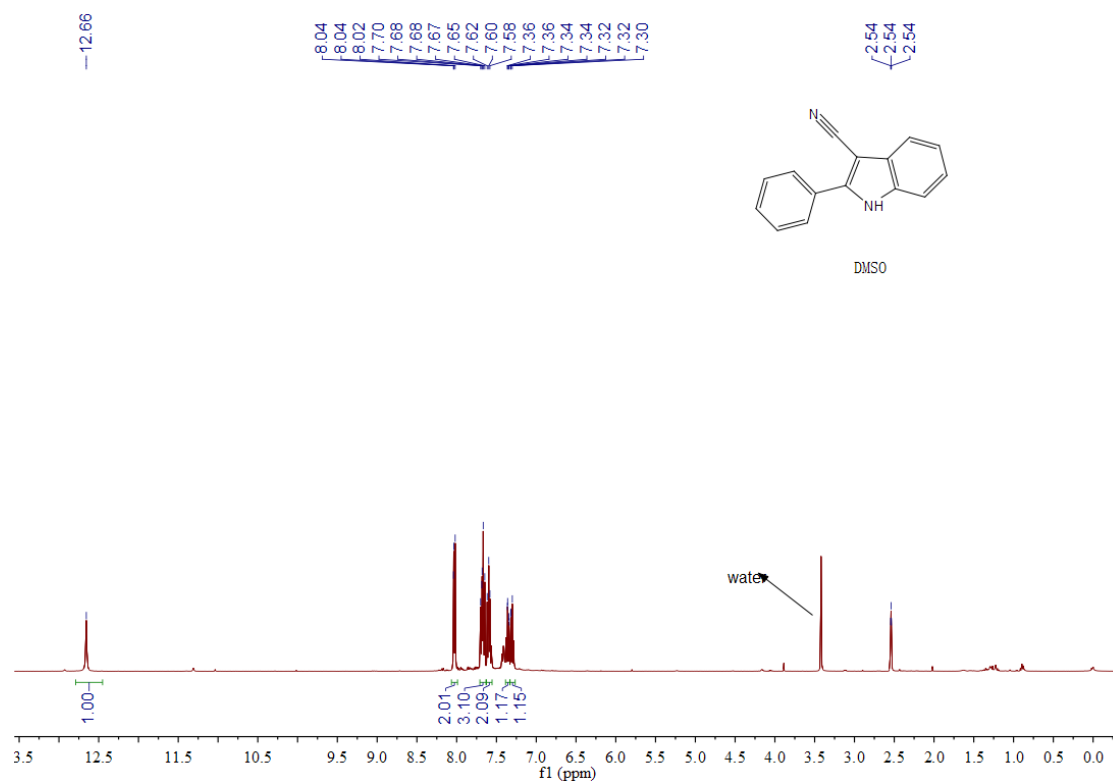

<sup>13</sup>C-NMR spectrum of **2h**

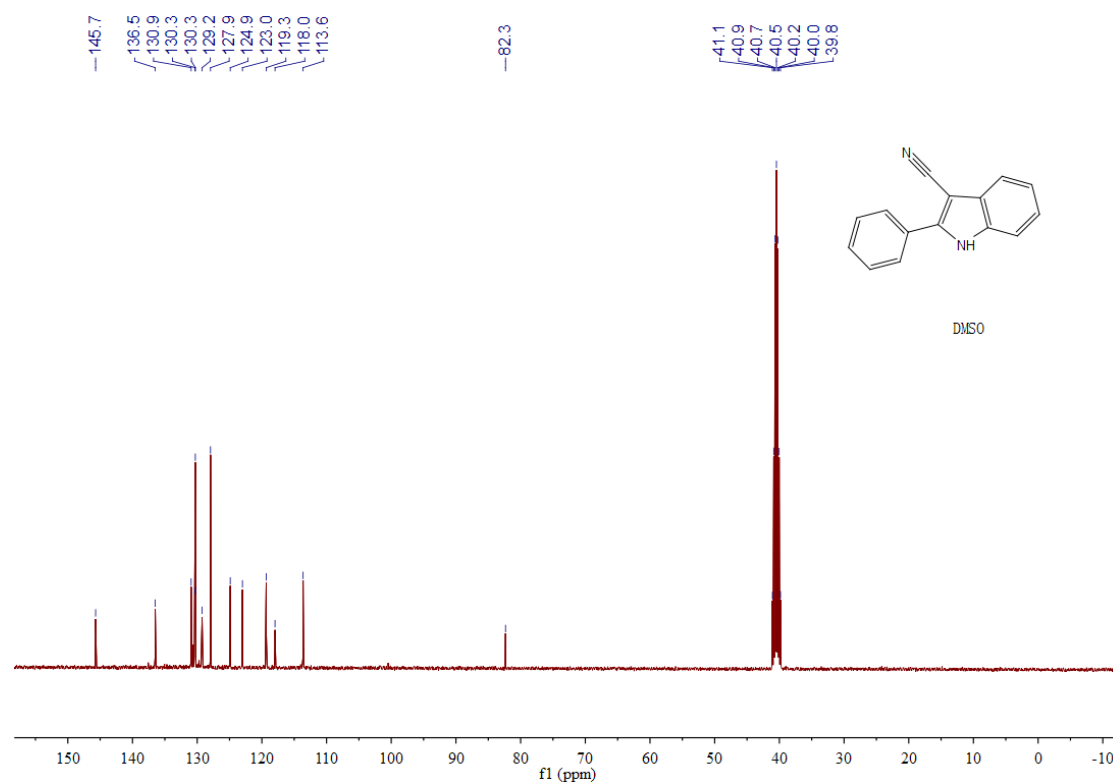

### <sup>1</sup>H-NMR spectrum of **2i**

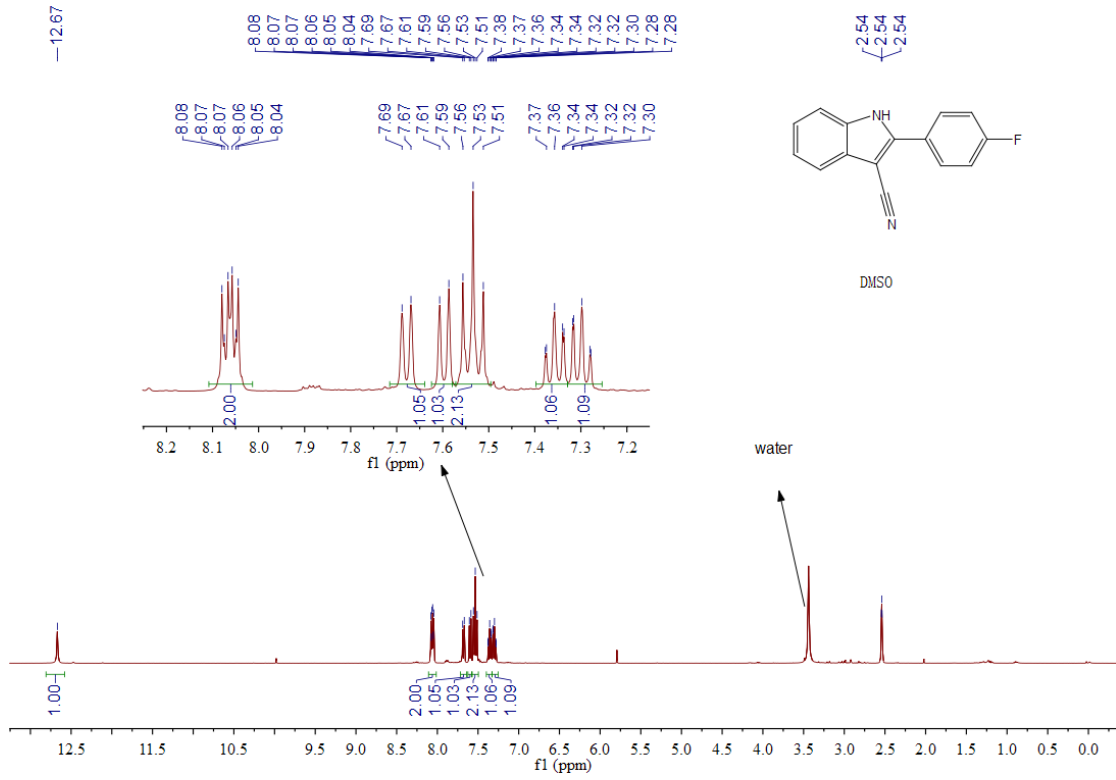

### <sup>13</sup>C-NMR spectrum of **2i**

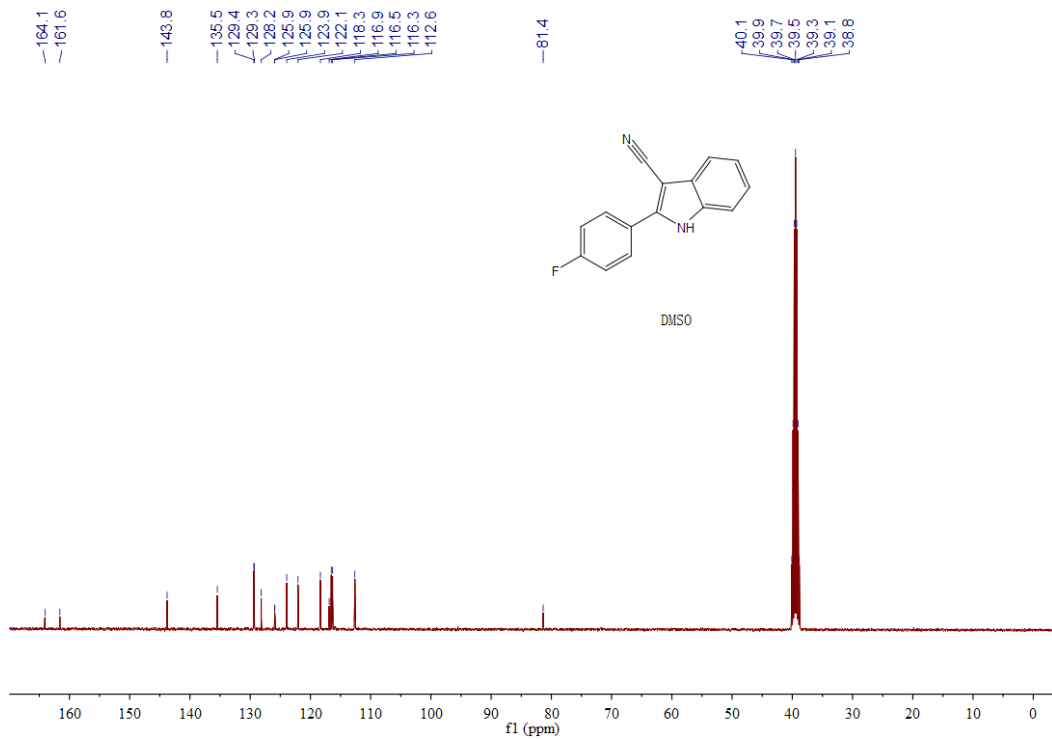

<sup>1</sup>H-NMR spectrum of **2j**

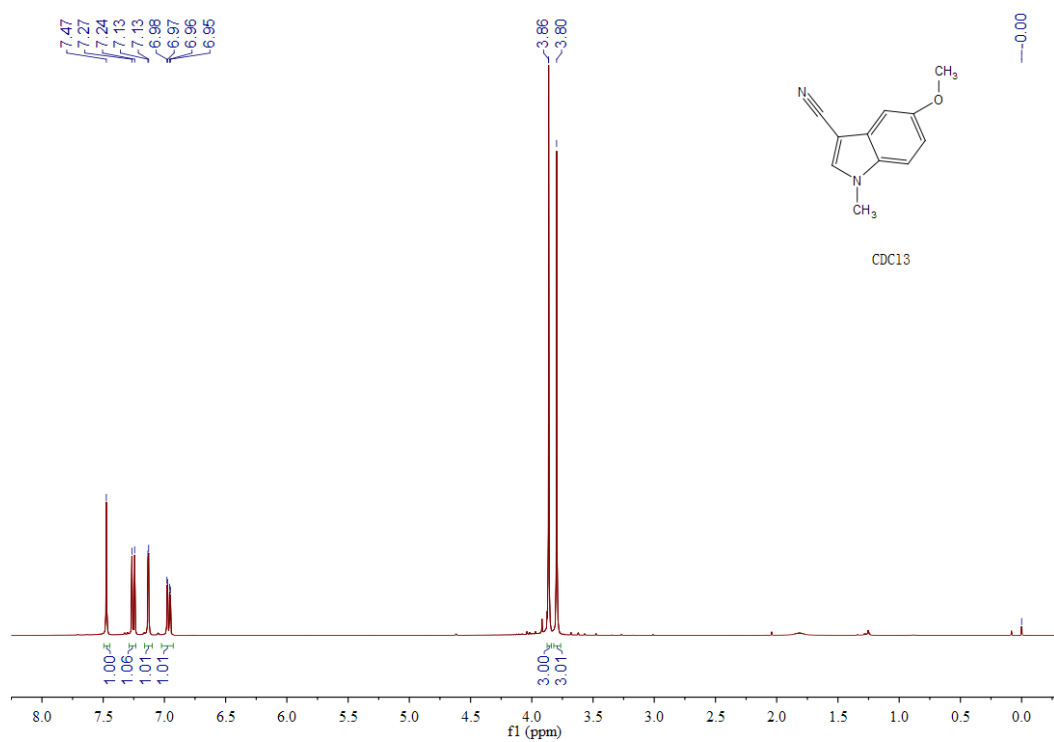

<sup>13</sup>C-NMR spectrum of **2j**

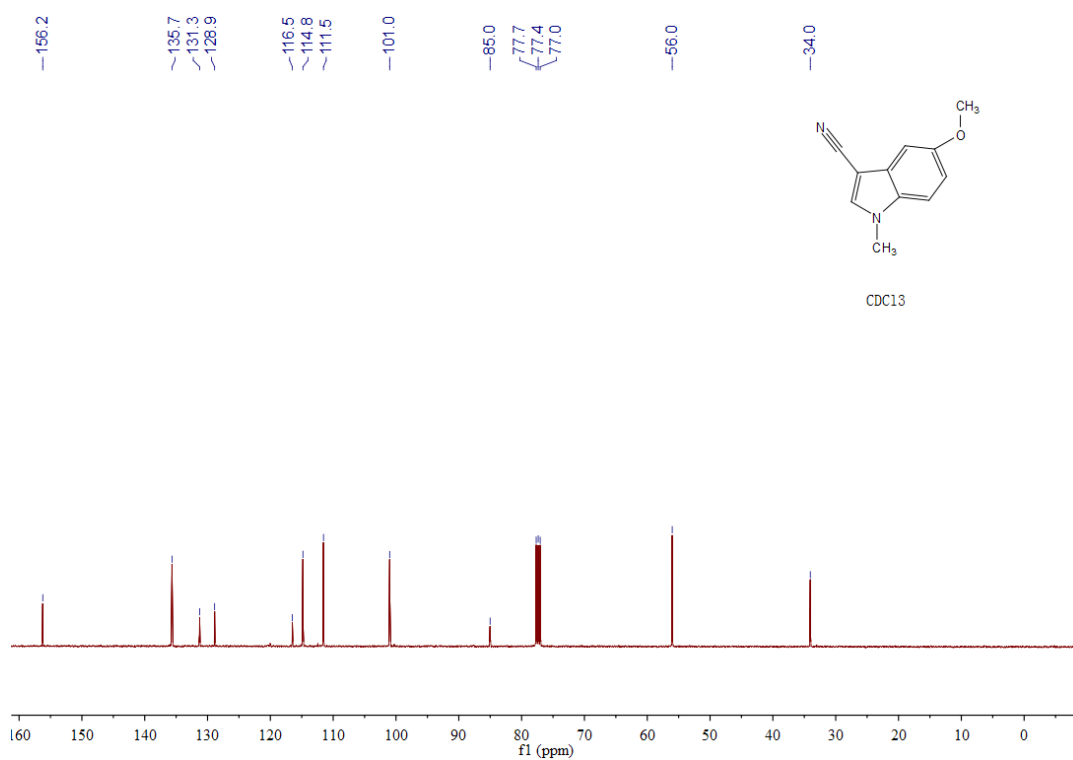

<sup>1</sup>H-NMR spectrum of **2k**

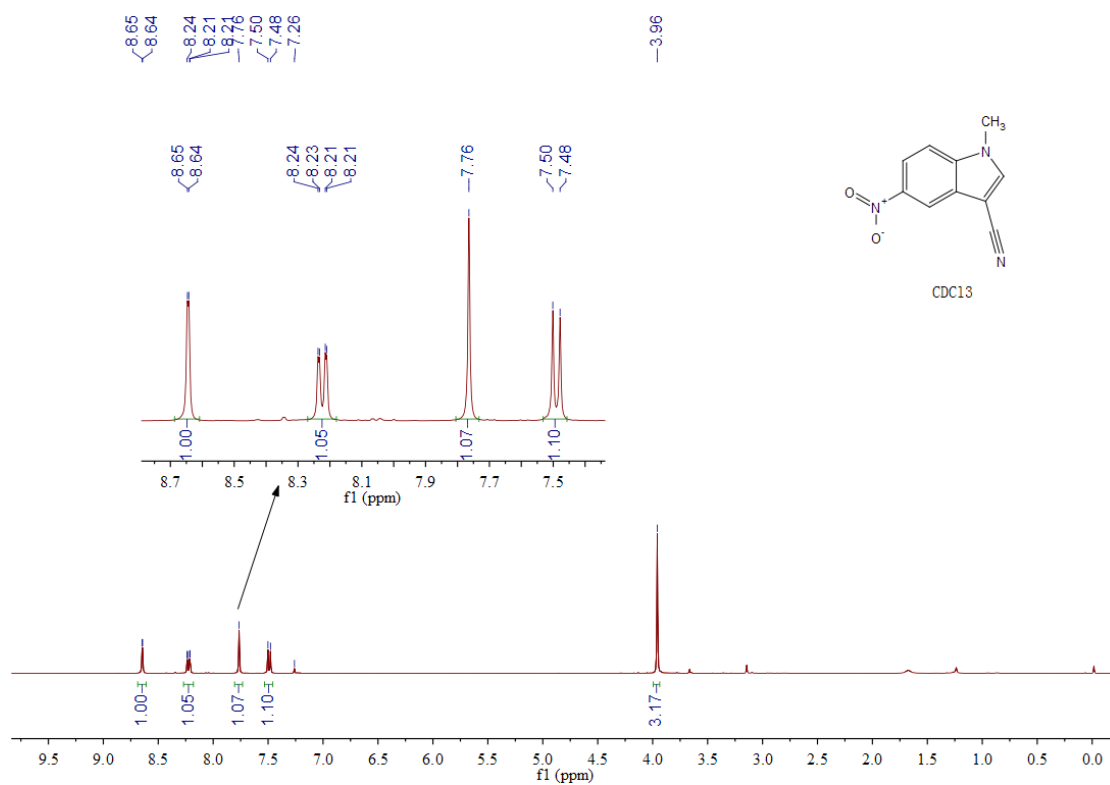

<sup>13</sup>C-NMR spectrum of **2k**

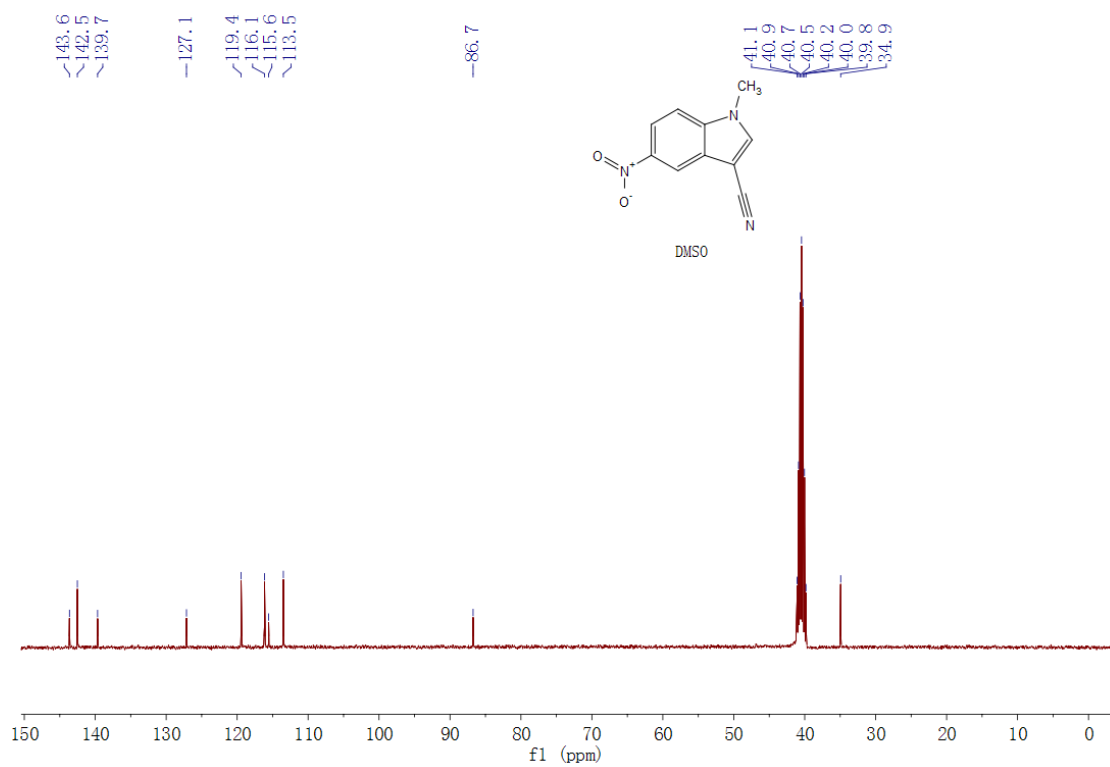



<sup>1</sup>H-NMR spectrum of **21**

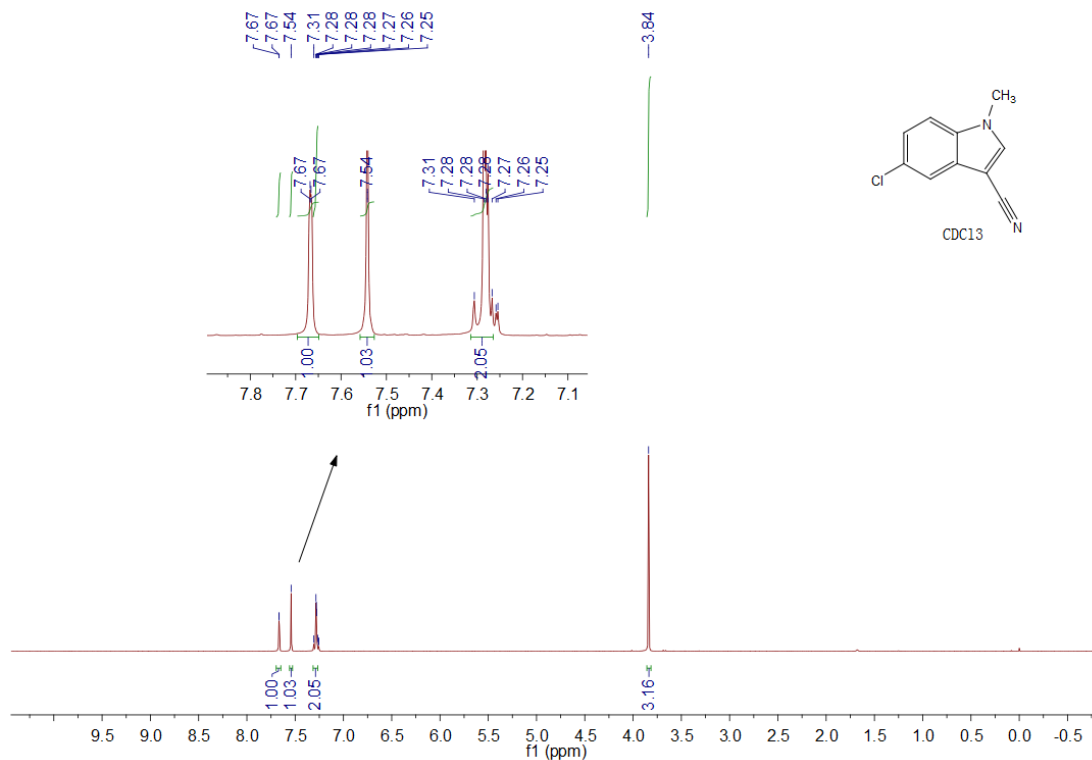

<sup>13</sup>C-NMR spectrum of **21**

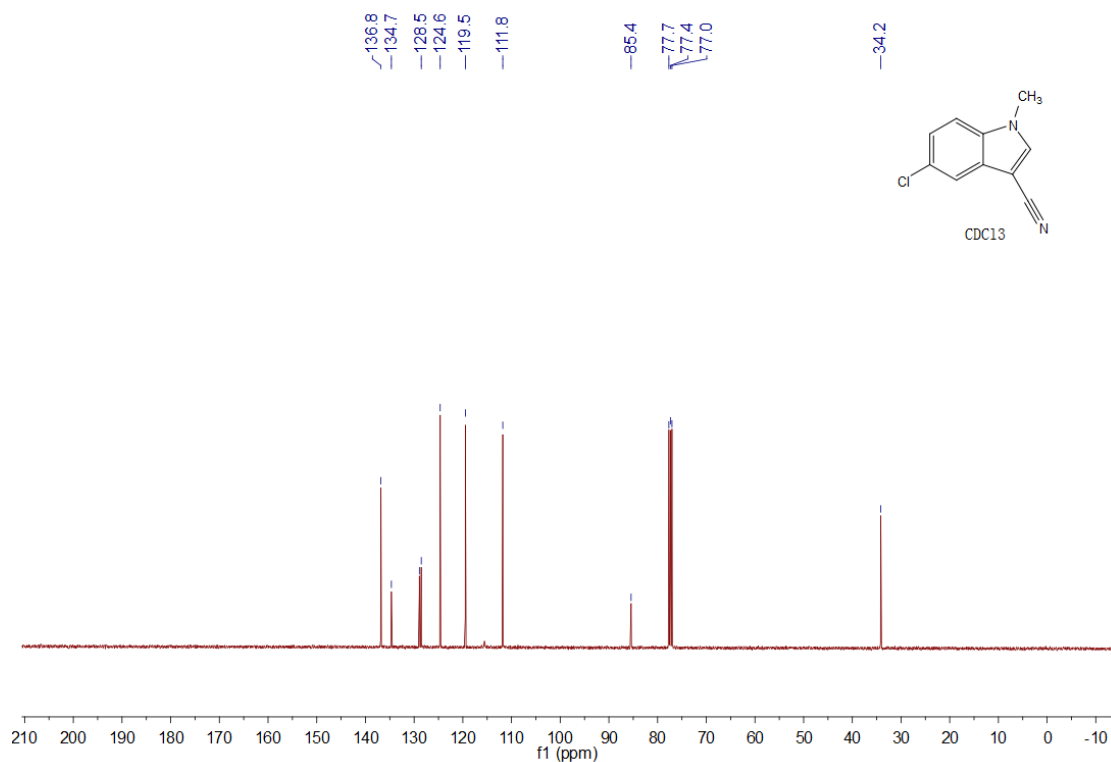

### <sup>1</sup>H-NMR spectrum of **2m**

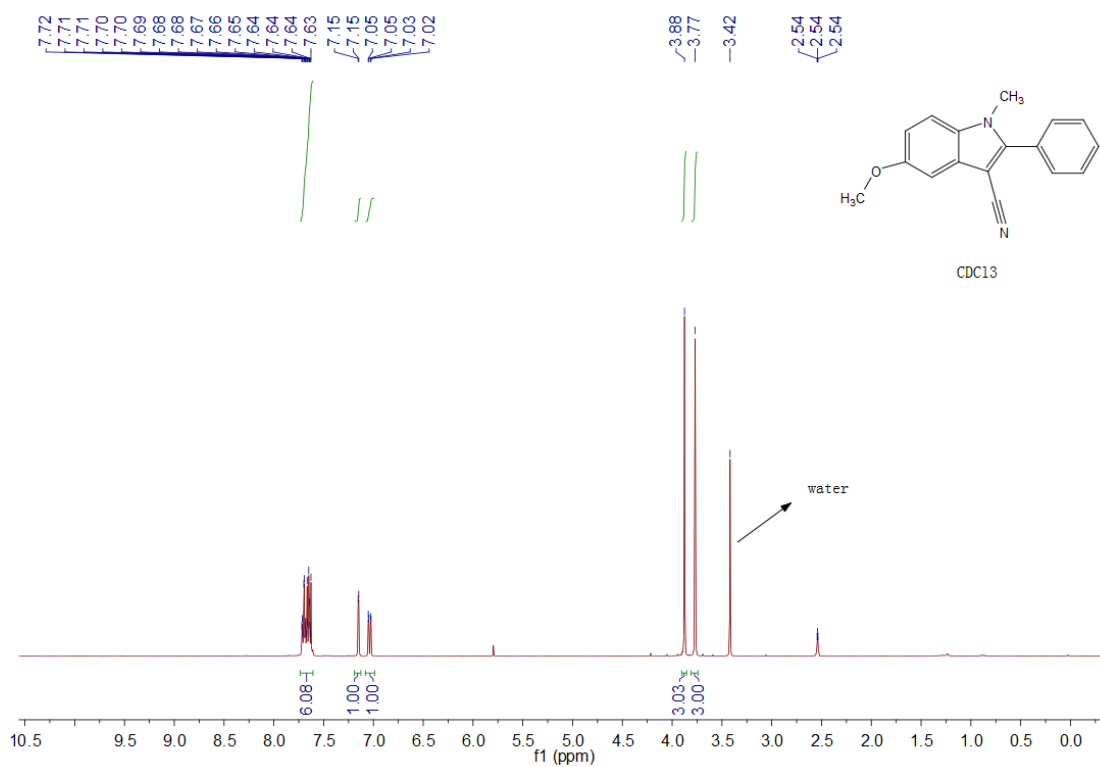

### <sup>13</sup>C-NMR spectrum of **2m**

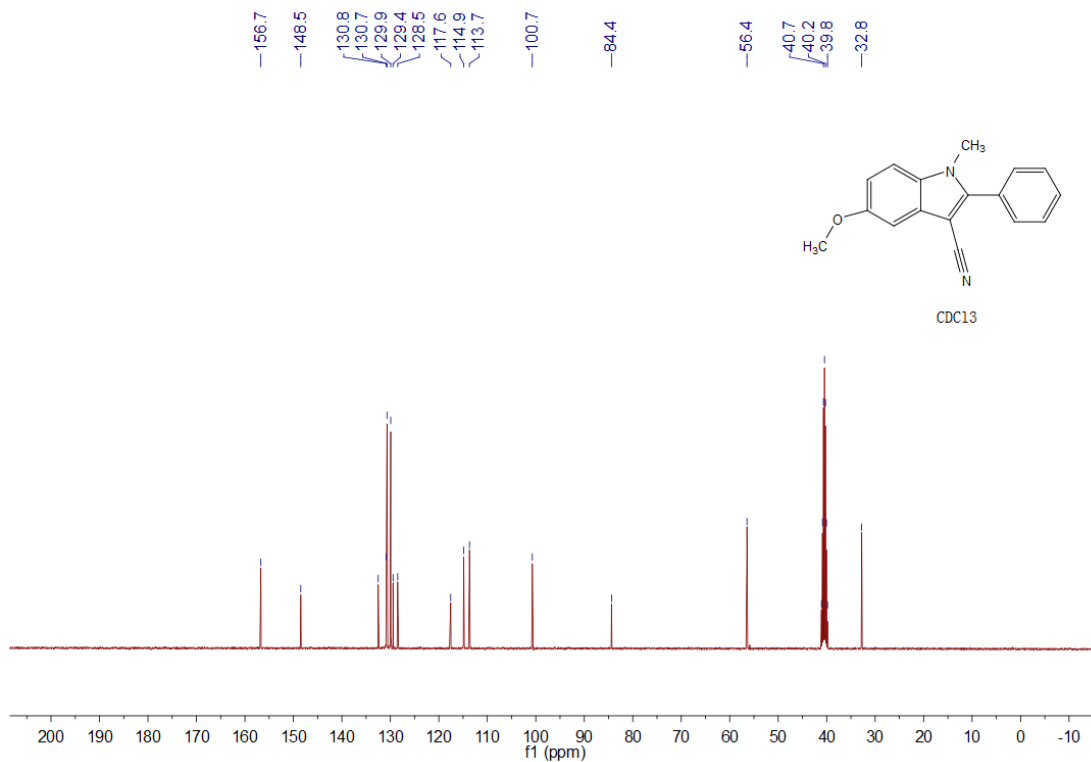

<sup>1</sup>H-NMR spectrum of **2n**

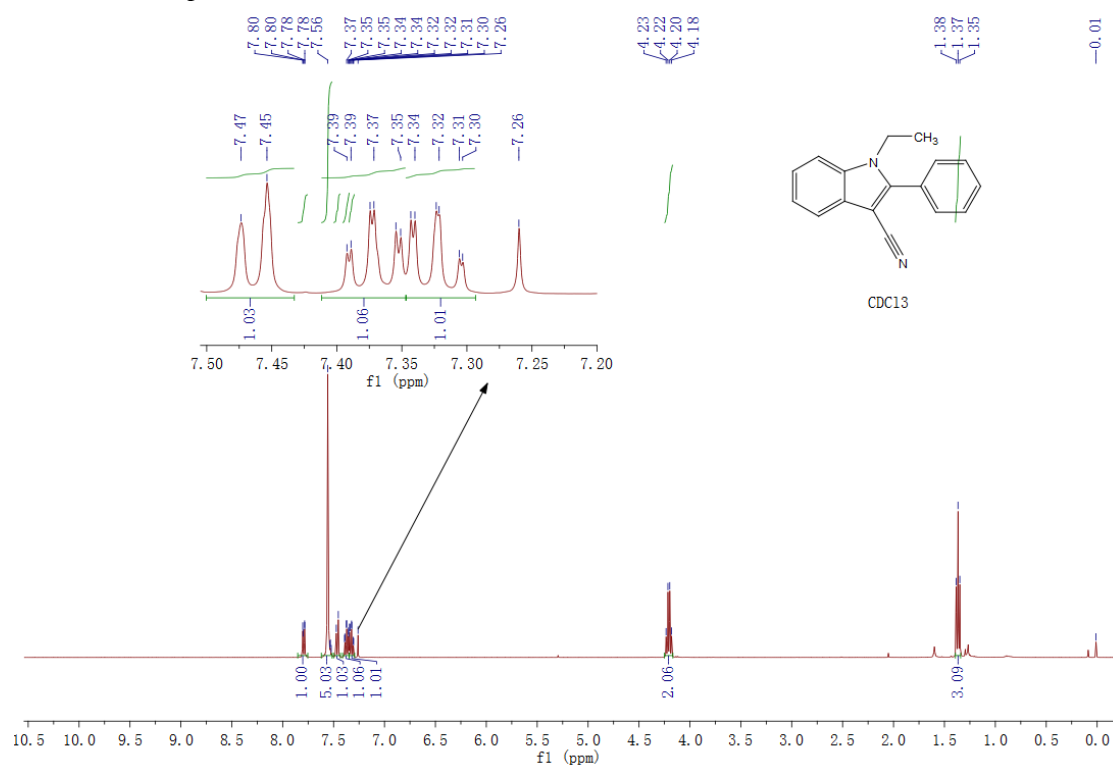

<sup>13</sup>C-NMR spectrum of **2n**

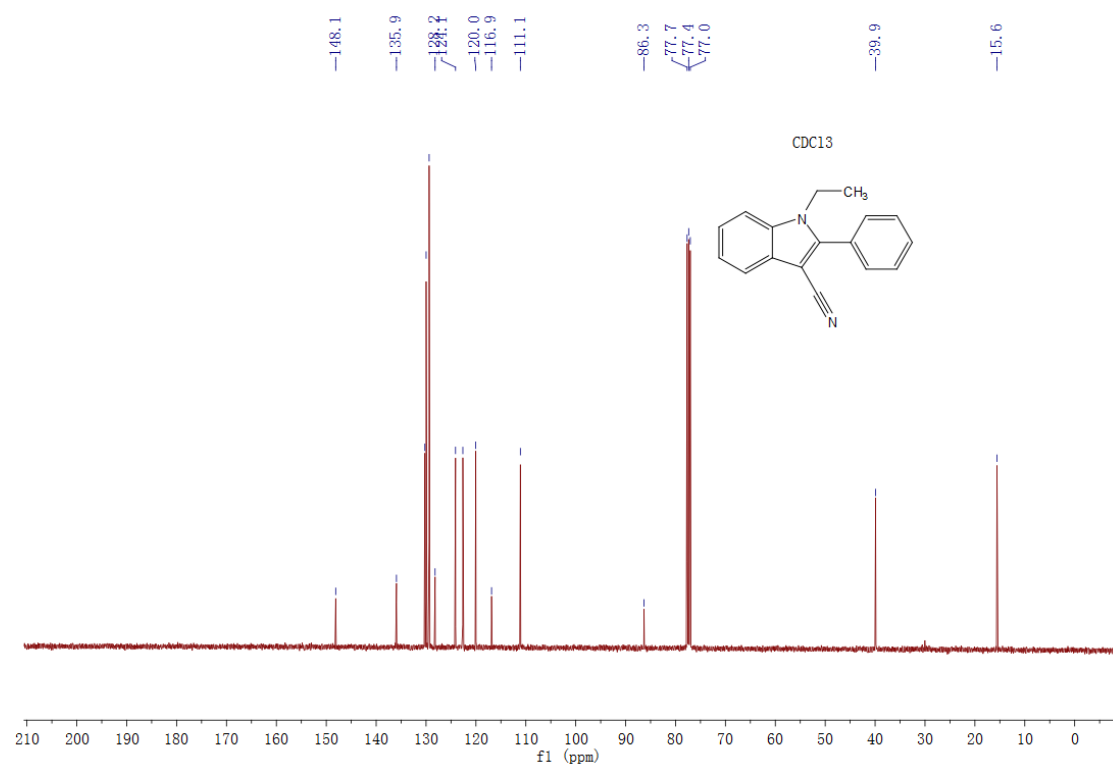

<sup>1</sup>H-NMR spectrum of **2o**

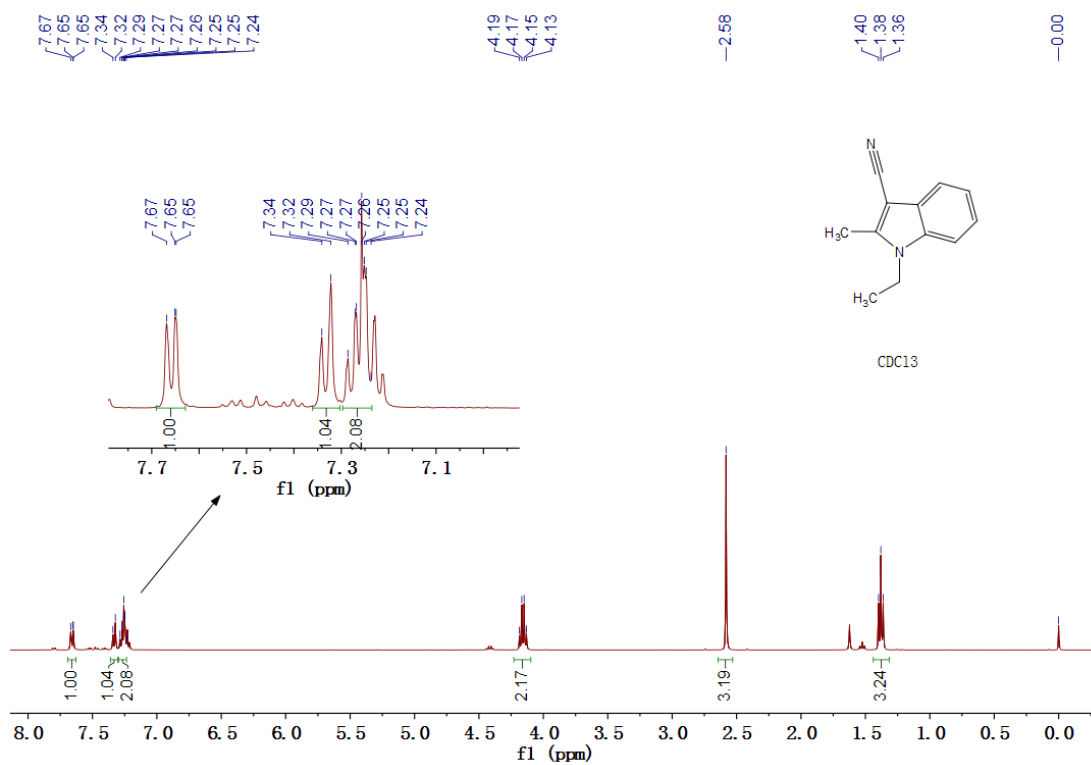

<sup>13</sup>C-NMR spectrum of **2o**

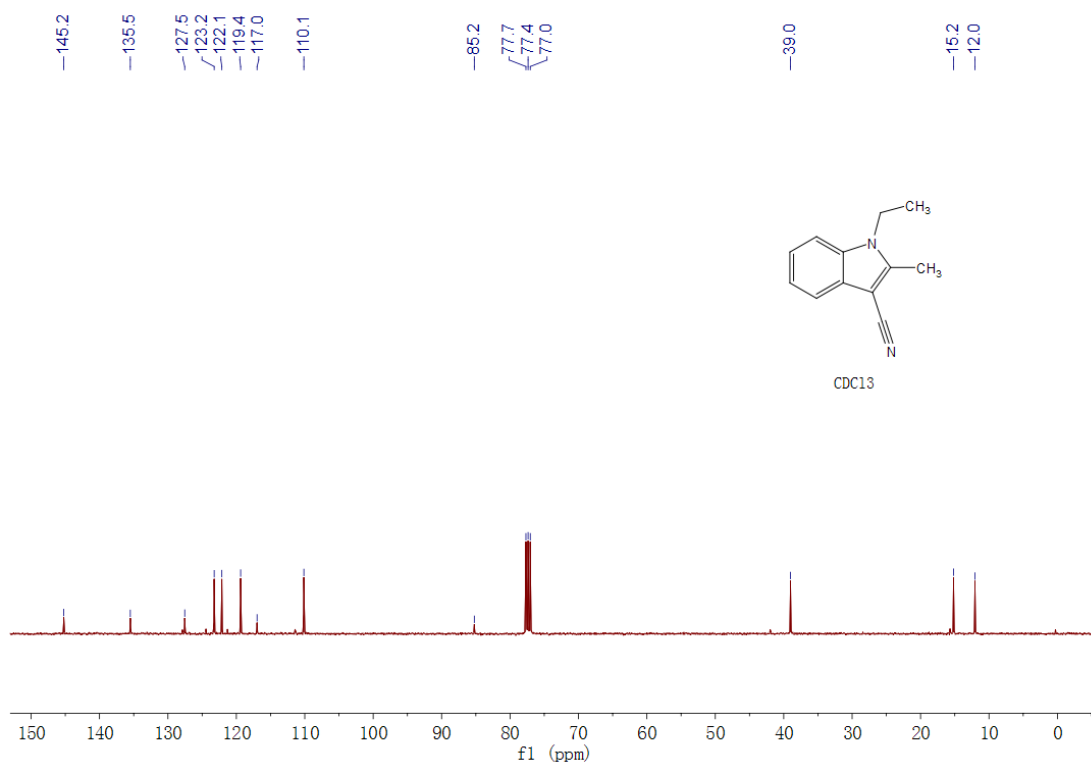

<sup>1</sup>H-NMR spectrum of 2p

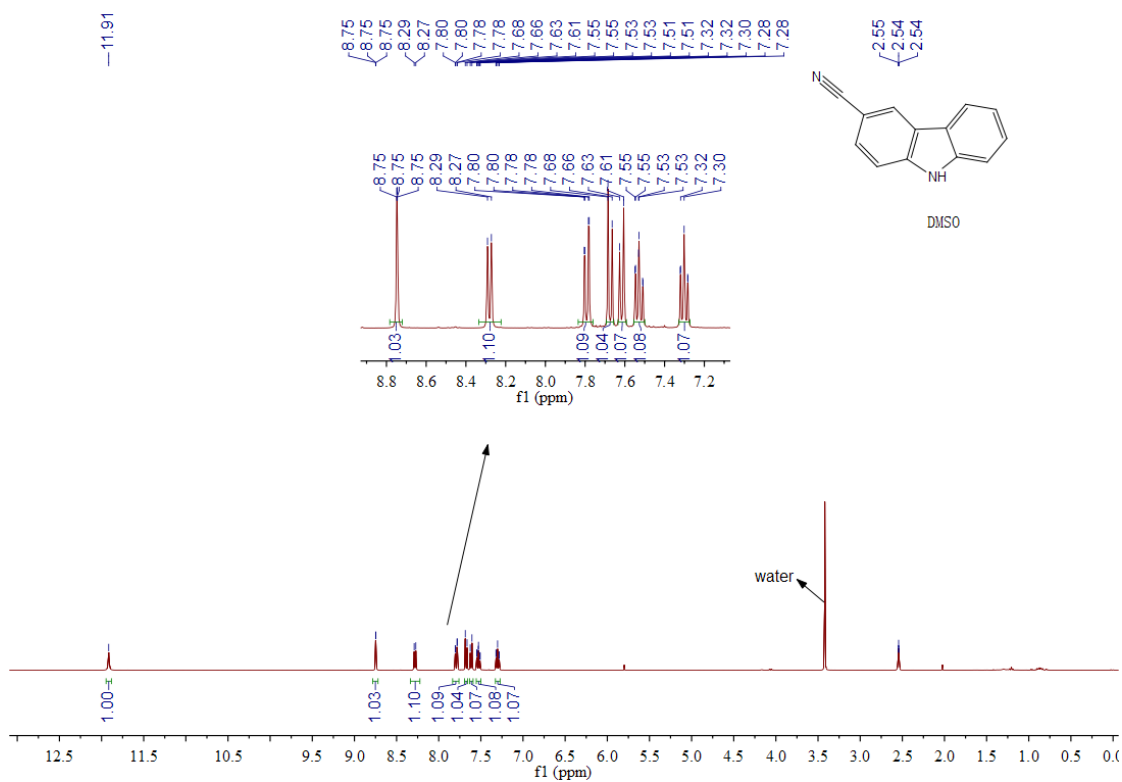

<sup>13</sup>C-NMR spectrum of 2p

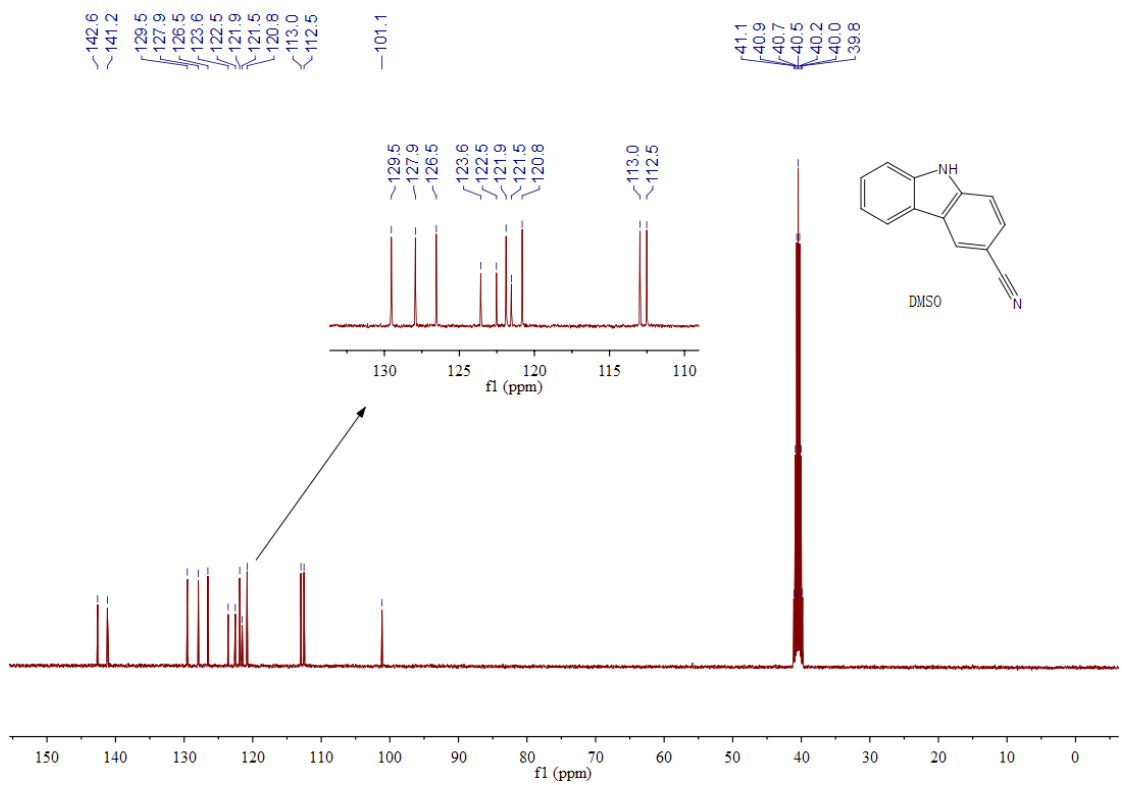

<sup>1</sup>H-NMR spectrum of **2q**

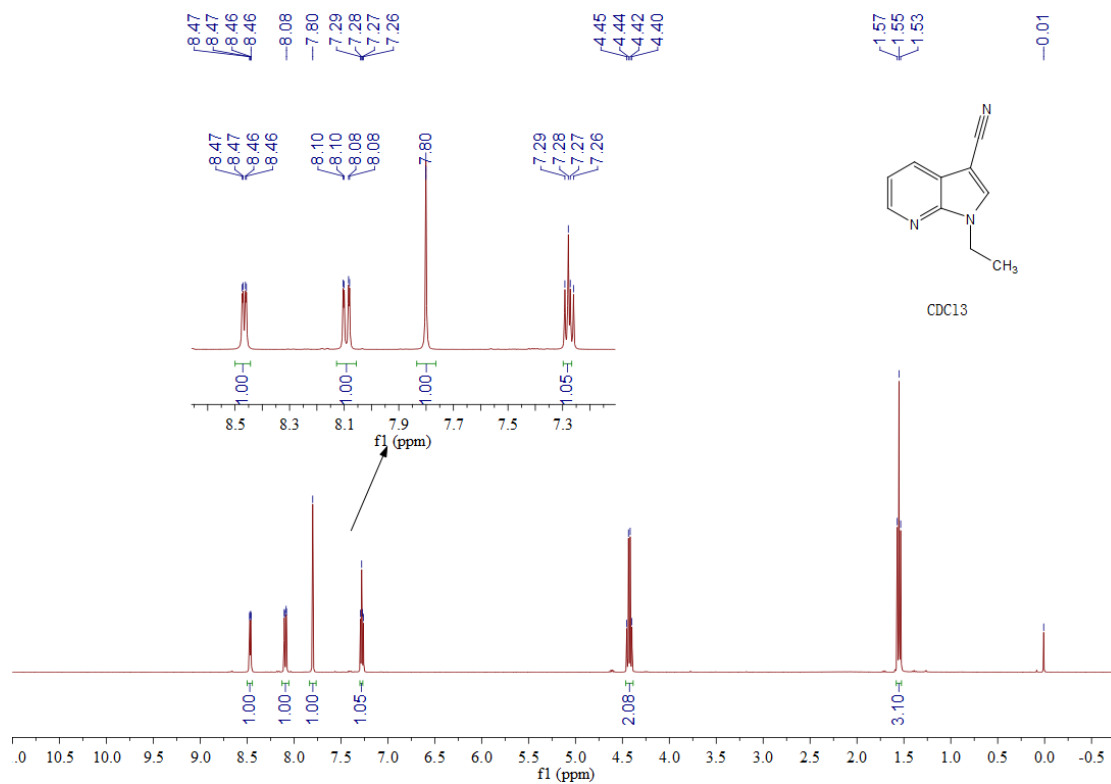

<sup>13</sup>C-NMR spectrum of **2q**

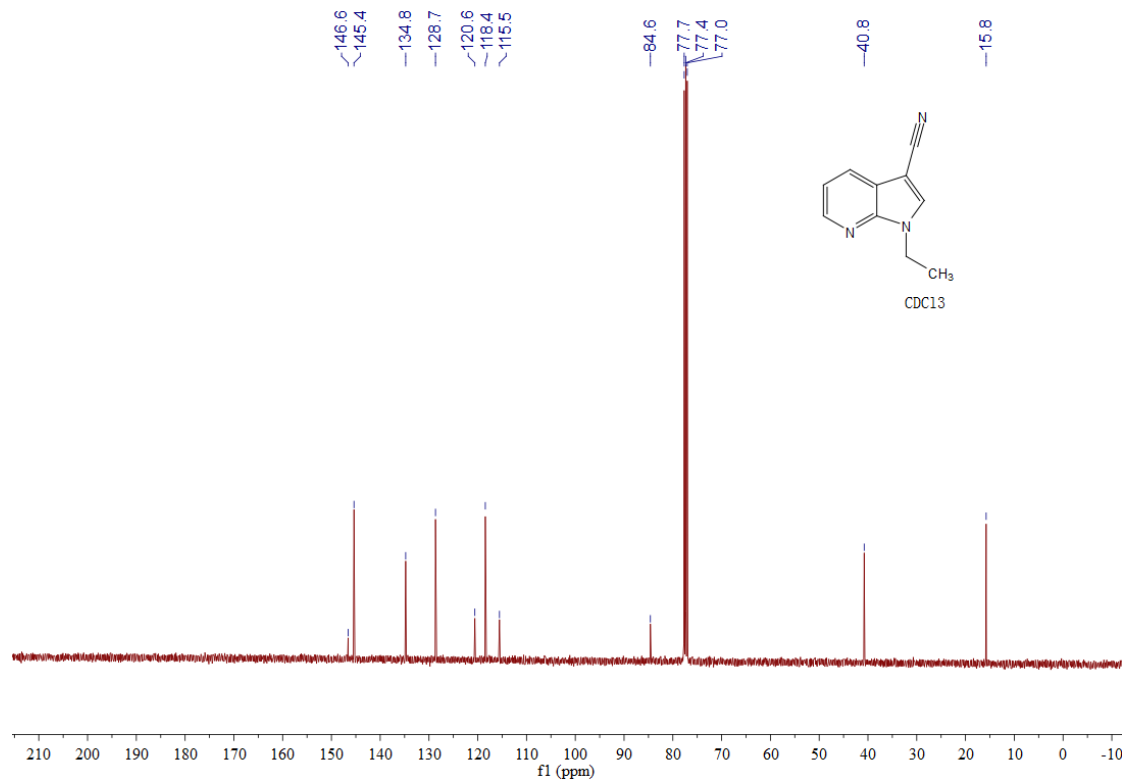

<sup>1</sup>H-NMR spectrum of **2r**

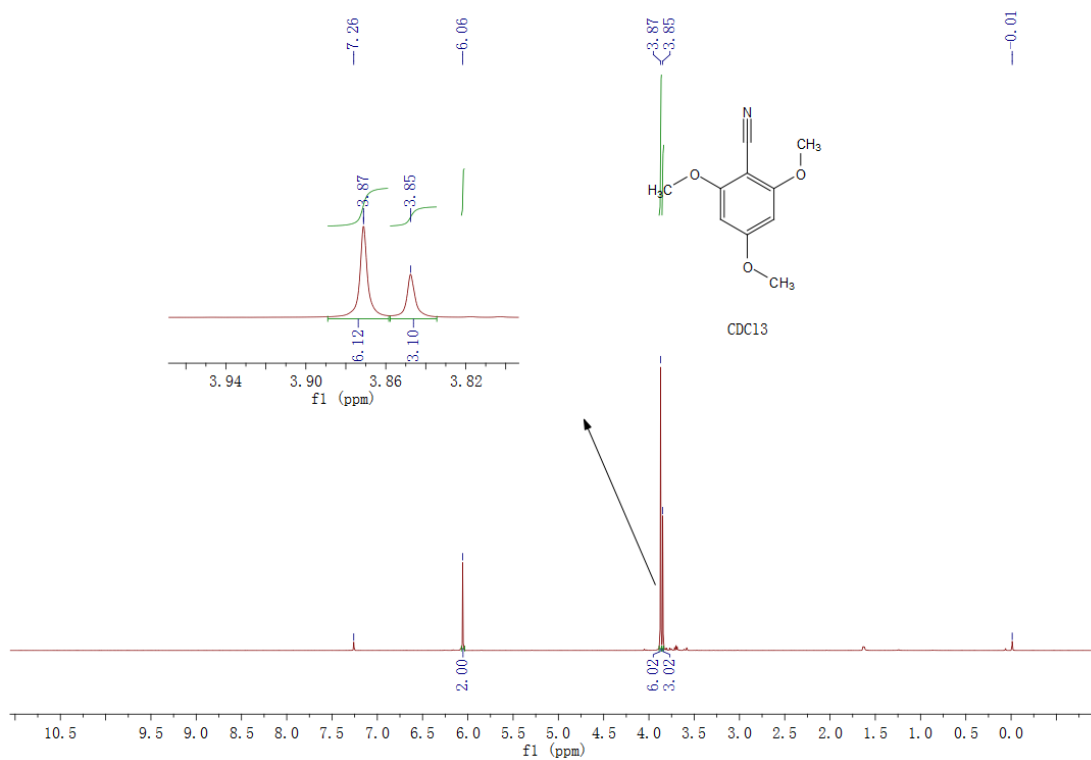

<sup>13</sup>C-NMR spectrum of **2r**

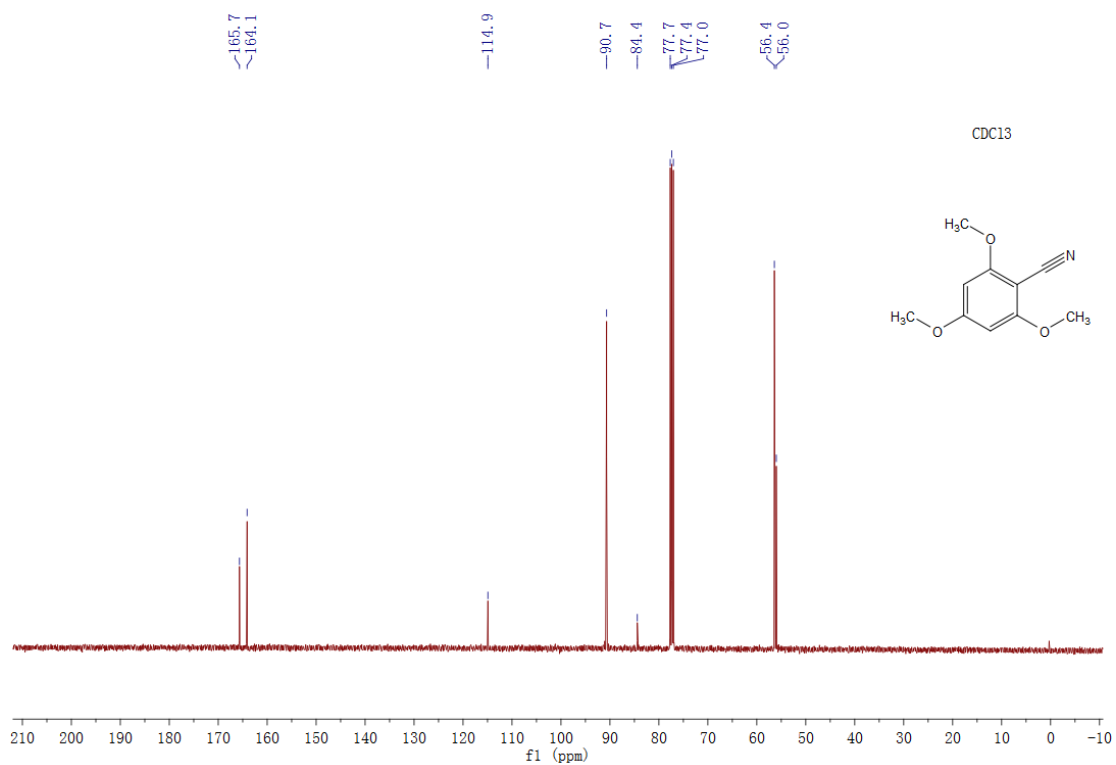

<sup>1</sup>H-NMR spectrum of **2s**

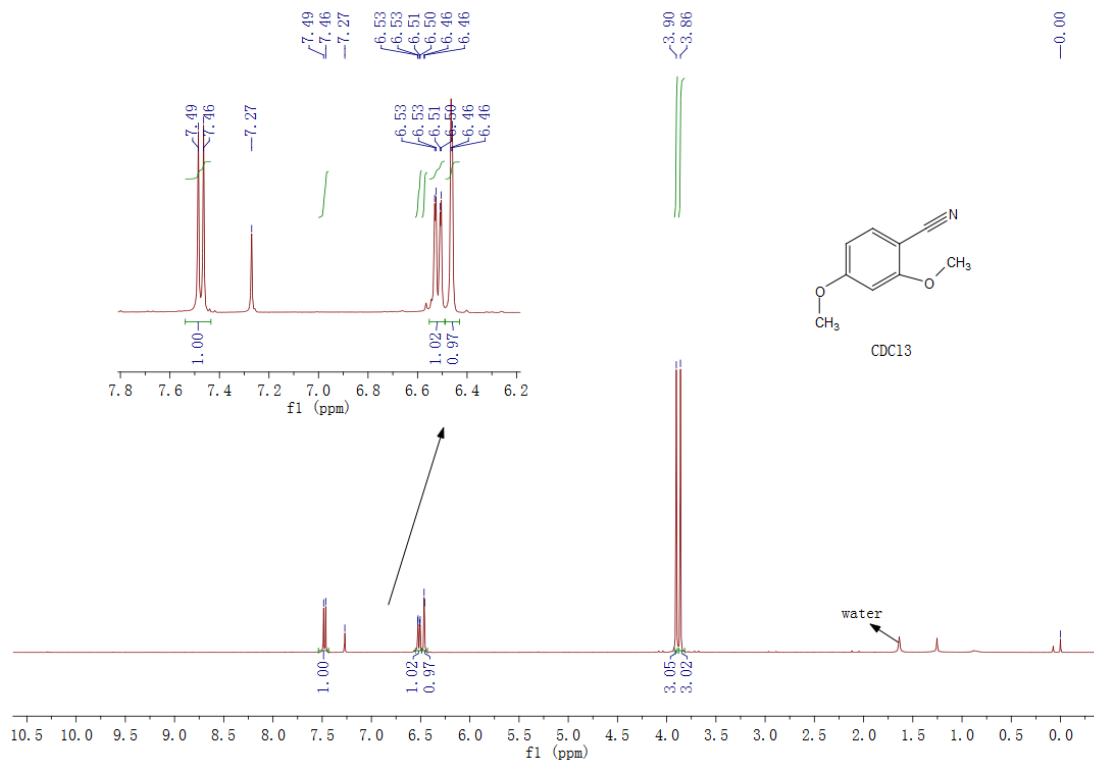

<sup>13</sup>C-NMR spectrum of **2s**

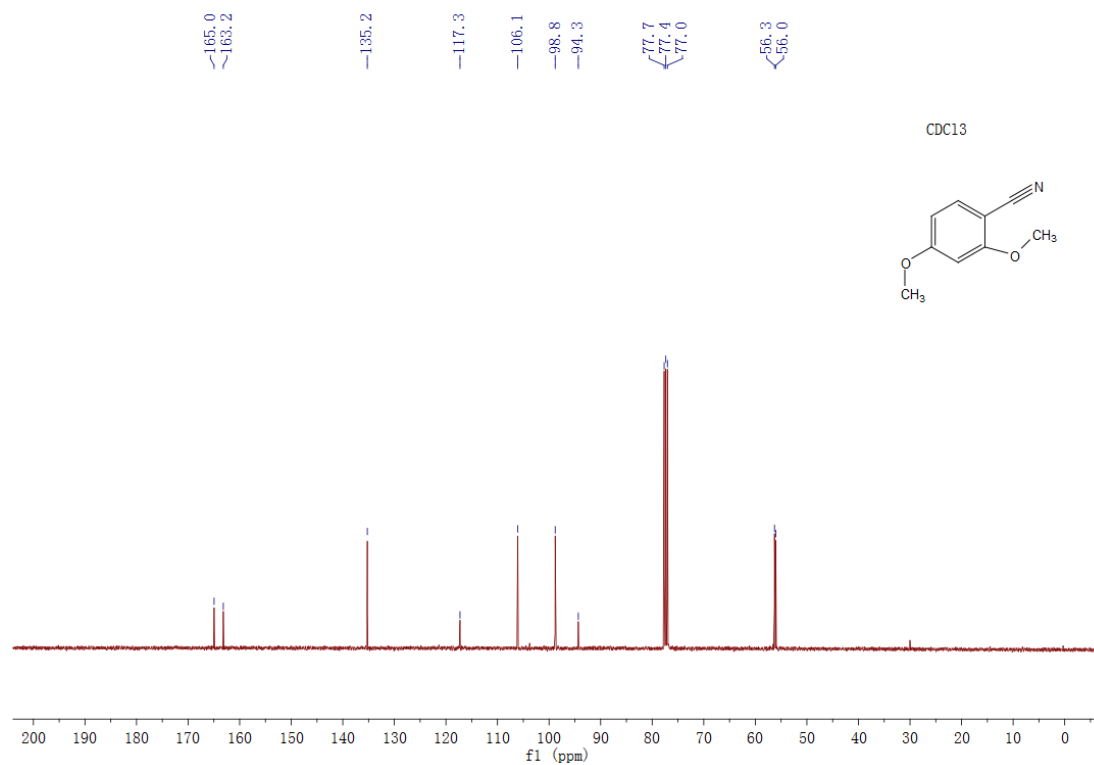



<sup>1</sup>H-NMR spectrum of **2t**

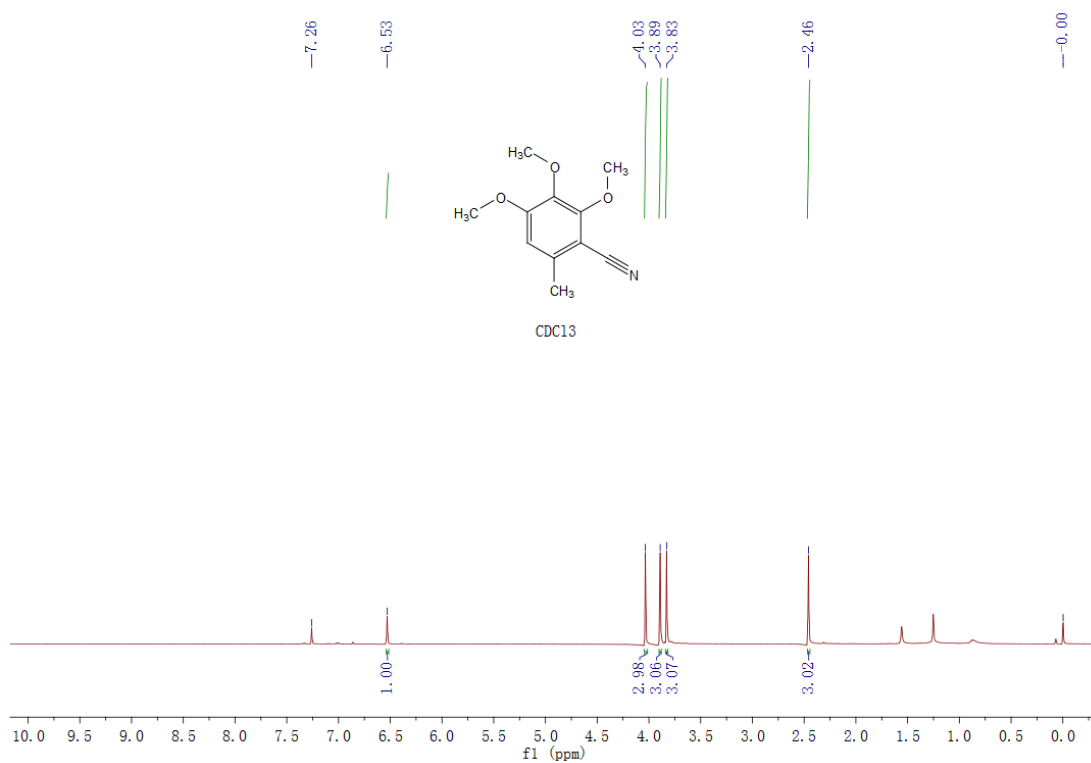

<sup>13</sup>C-NMR spectrum of **2t**

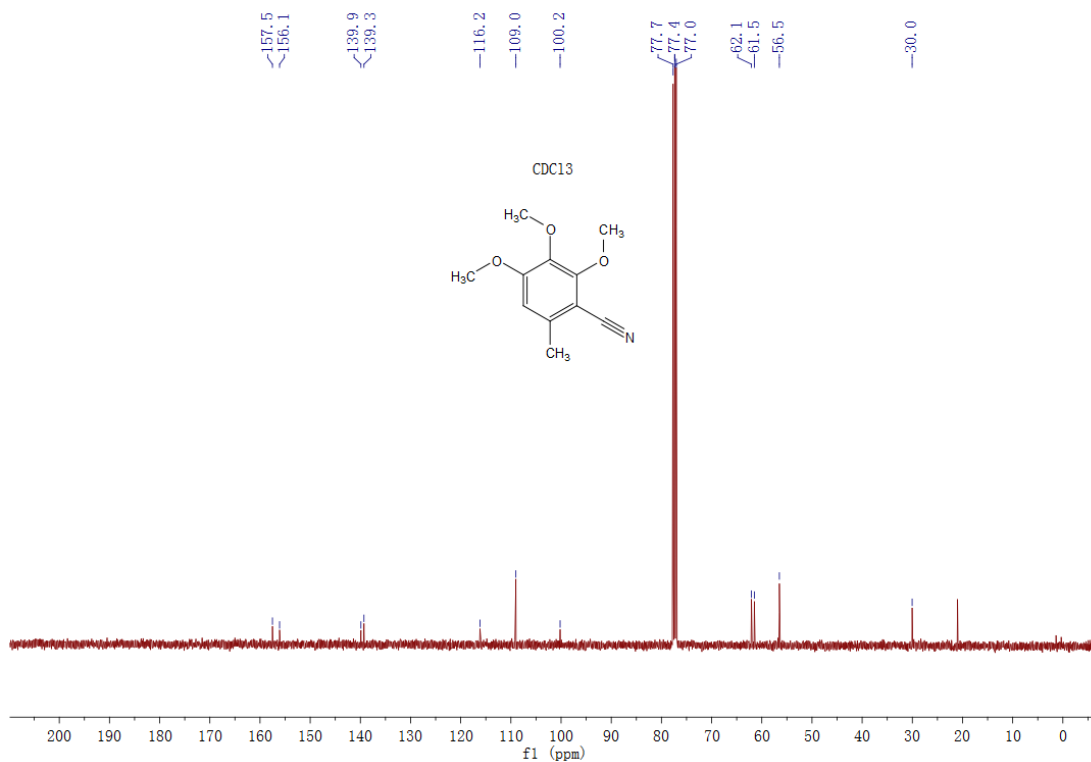

<sup>1</sup>H-NMR spectrum of **2u**

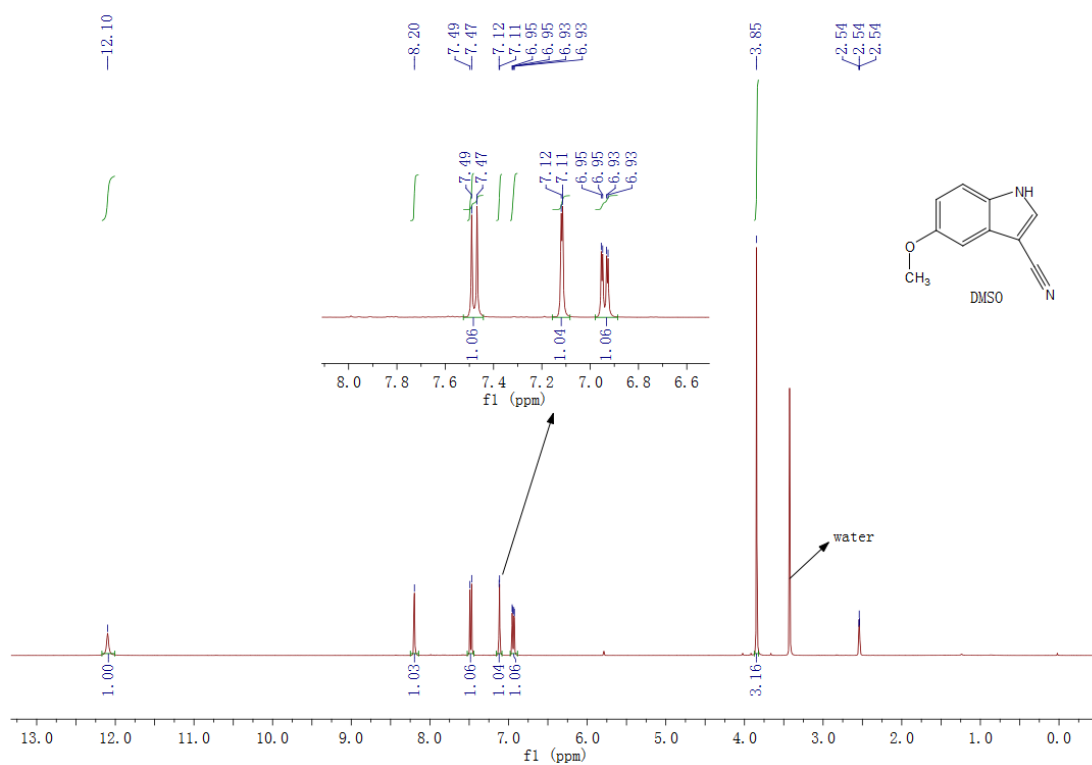

<sup>13</sup>C-NMR spectrum of **2u**

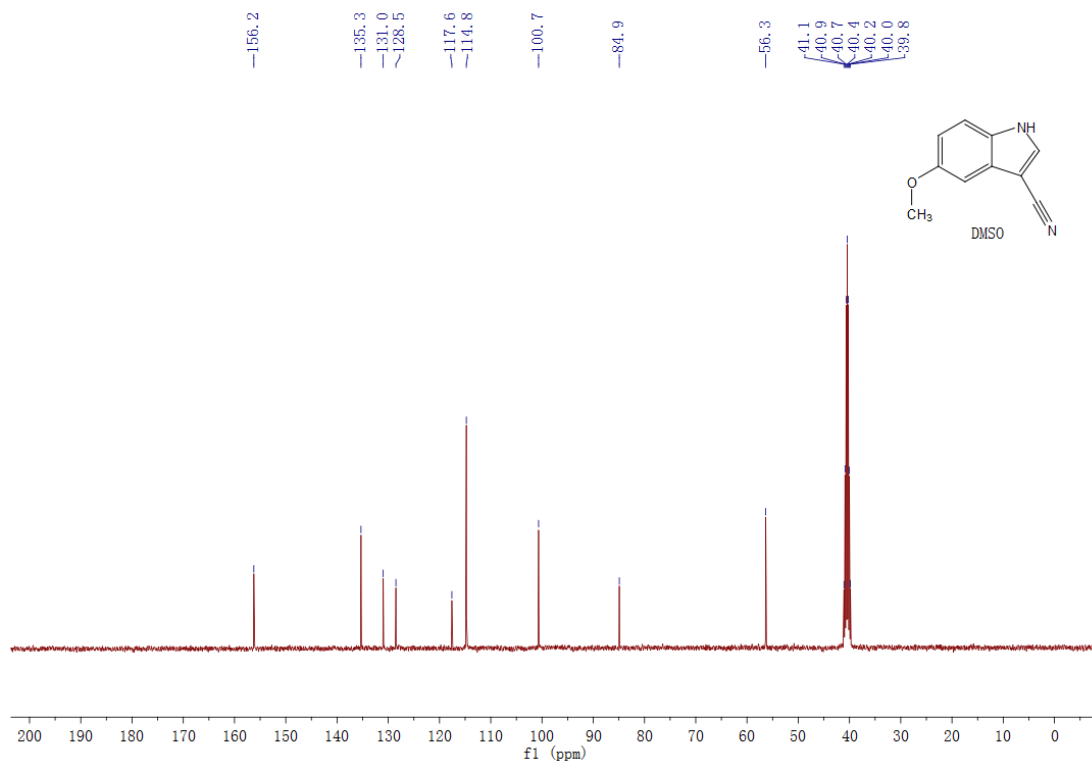

<sup>1</sup>H-NMR spectrum of **2v**

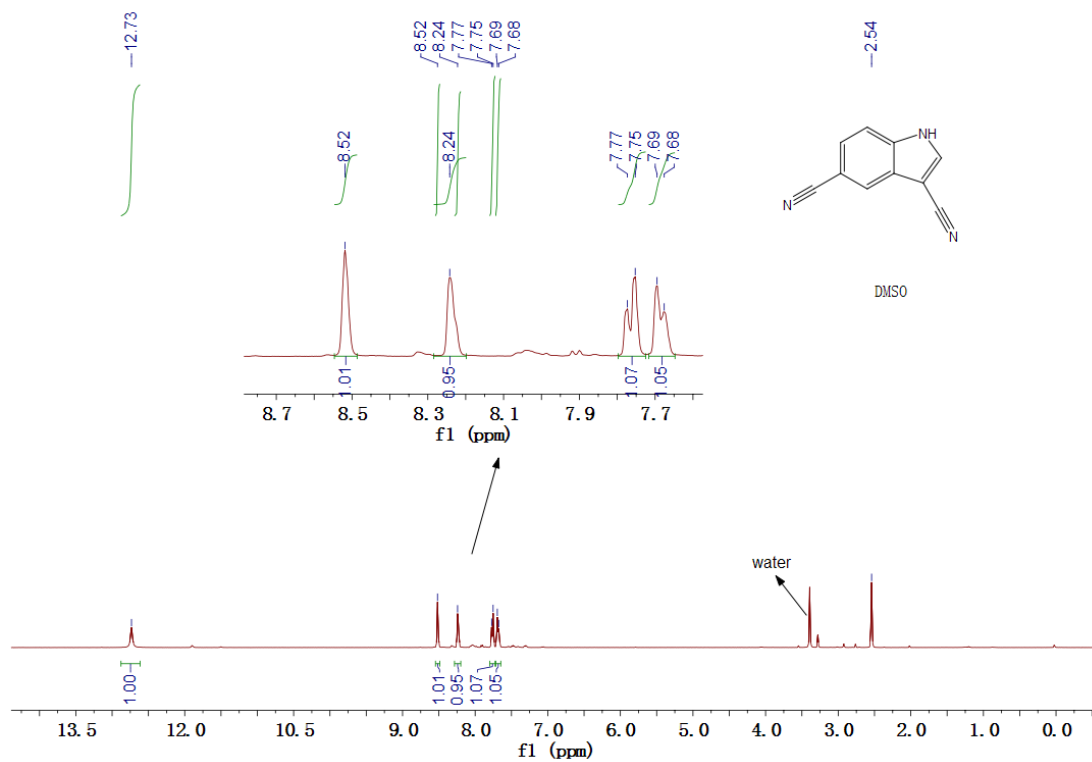

<sup>13</sup>C-NMR spectrum of **2v**

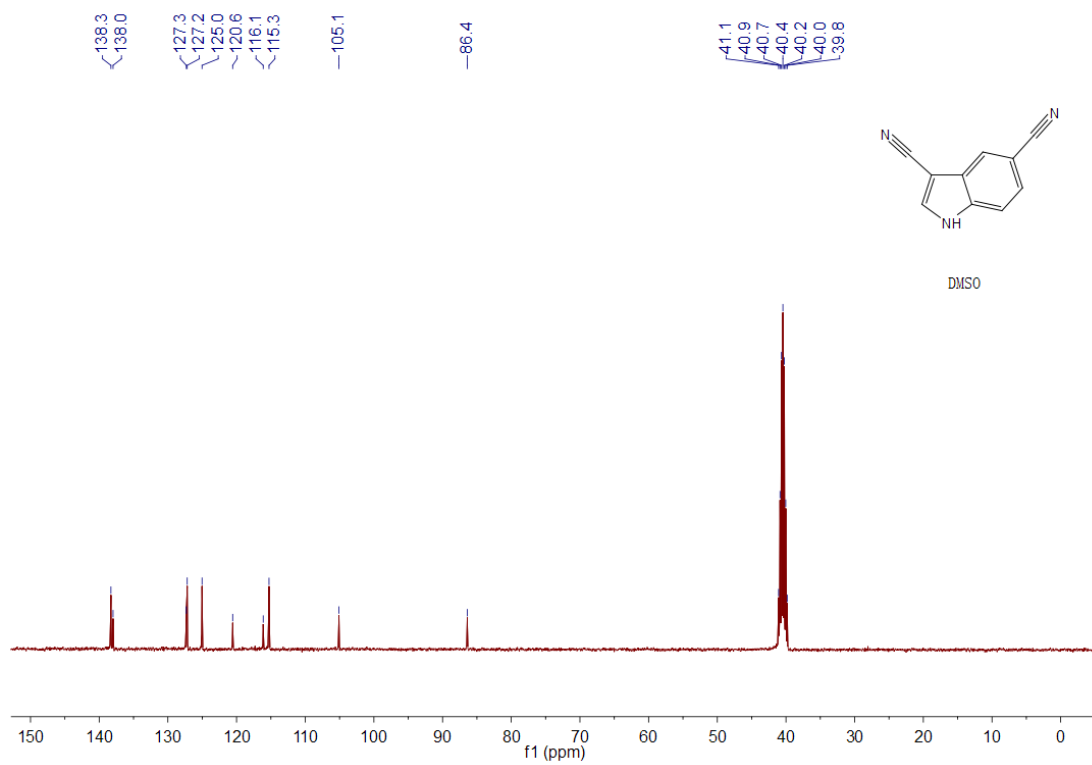

<sup>1</sup>H-NMR spectrum of **2w**

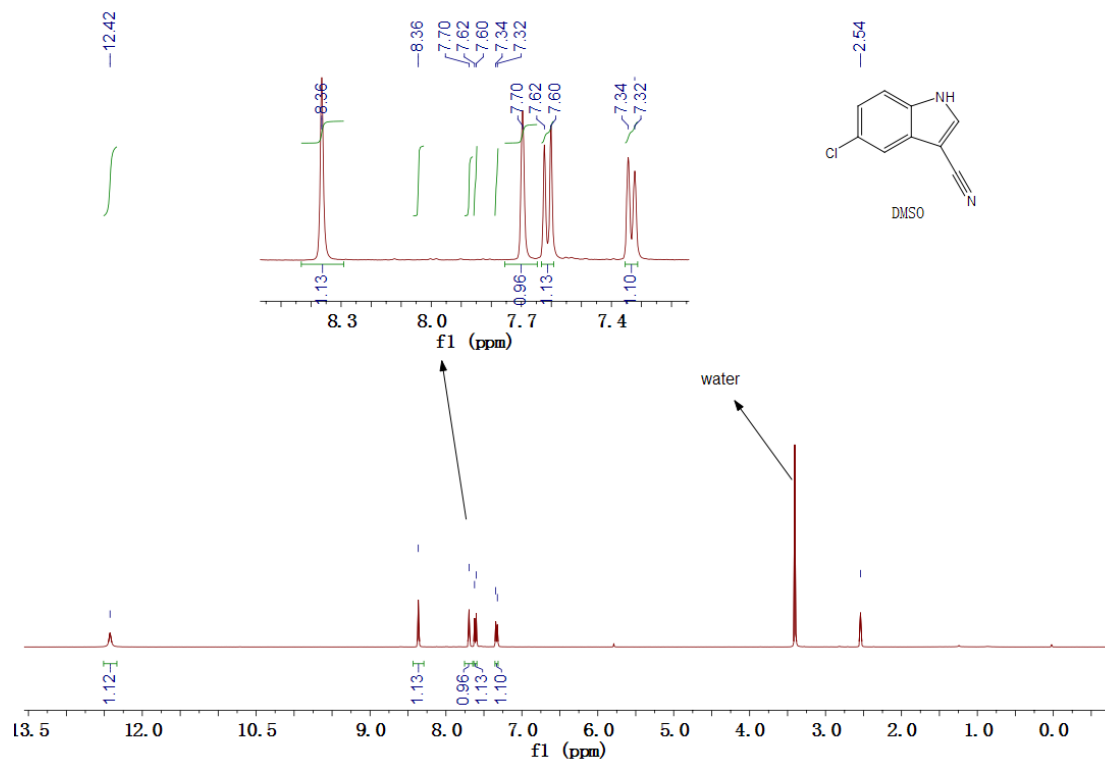

<sup>13</sup>C-NMR spectrum of **2w**

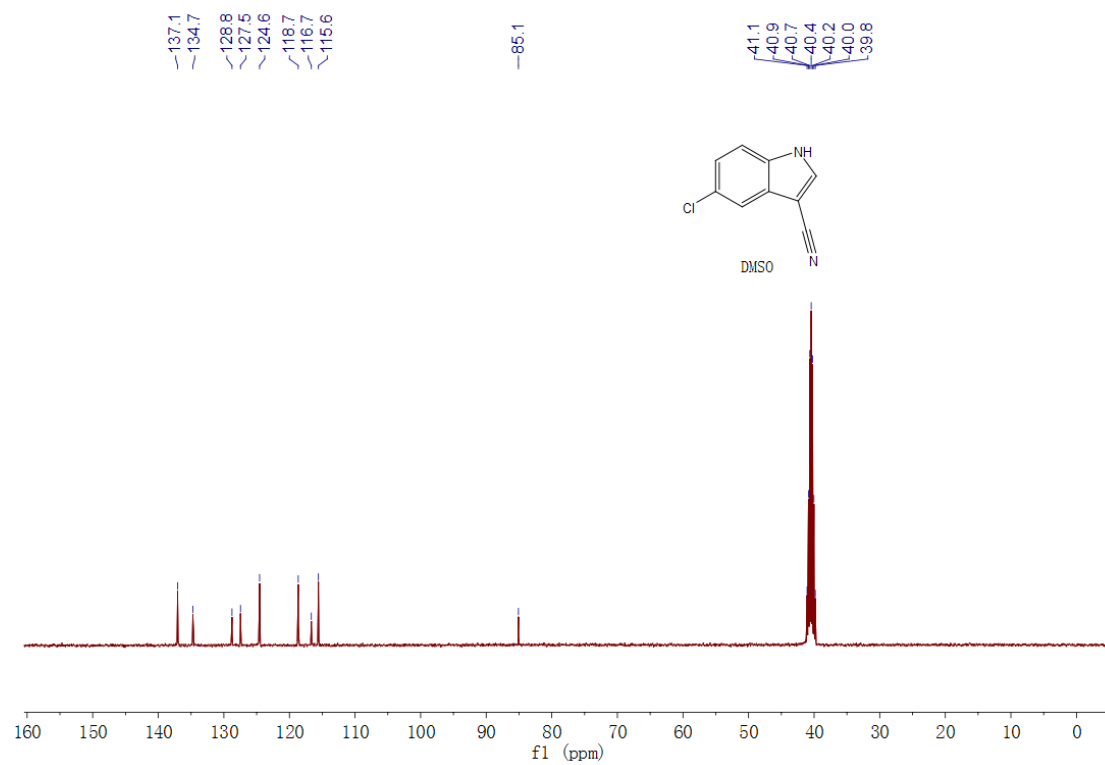

<sup>1</sup>H-NMR spectrum of **2x**

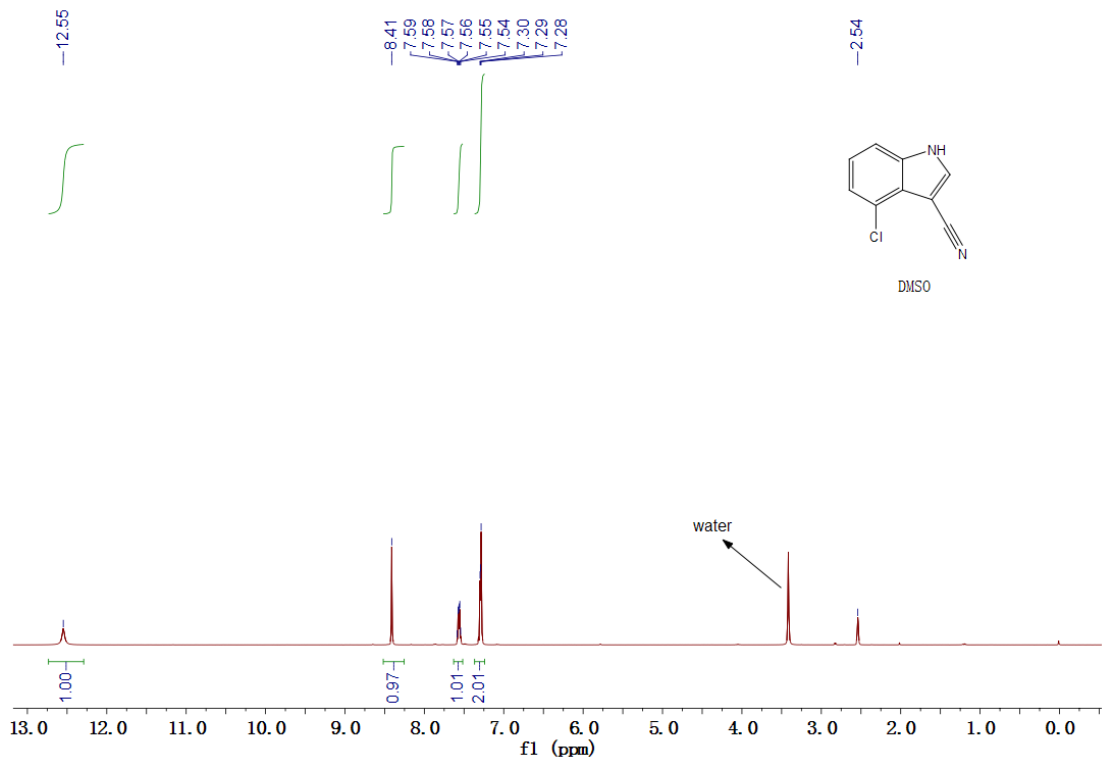

<sup>13</sup>C-NMR spectrum of **2x**

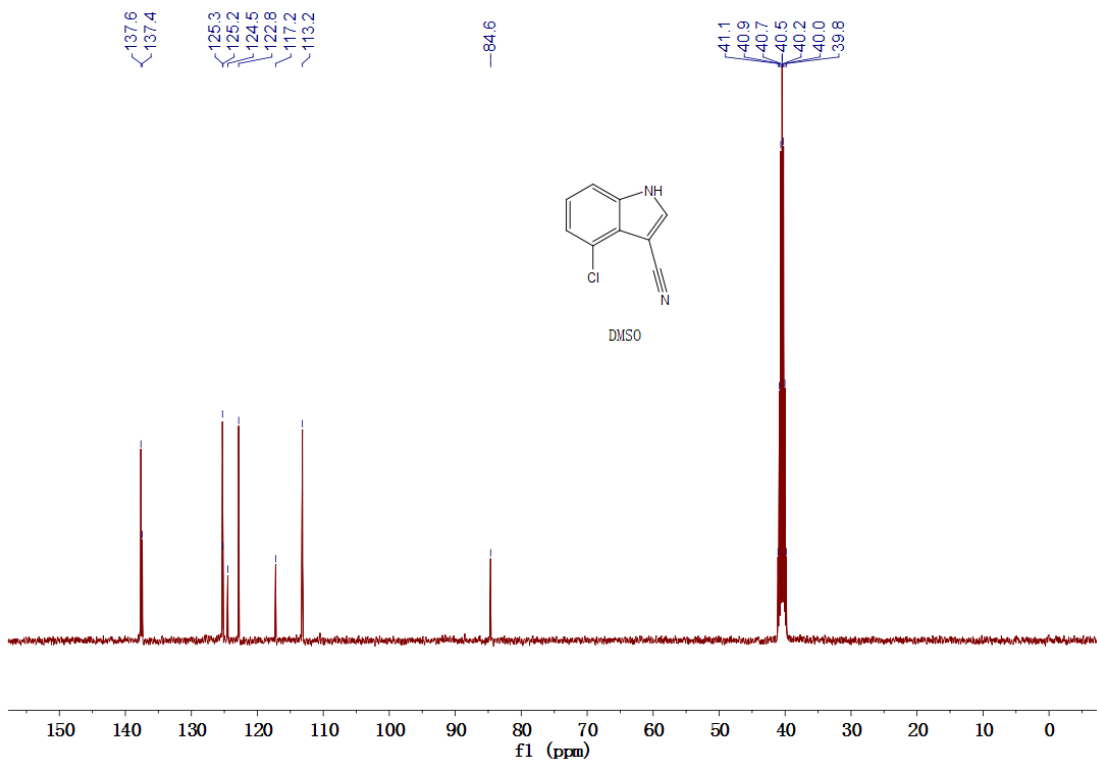

<sup>1</sup>H-NMR spectrum of **2y**

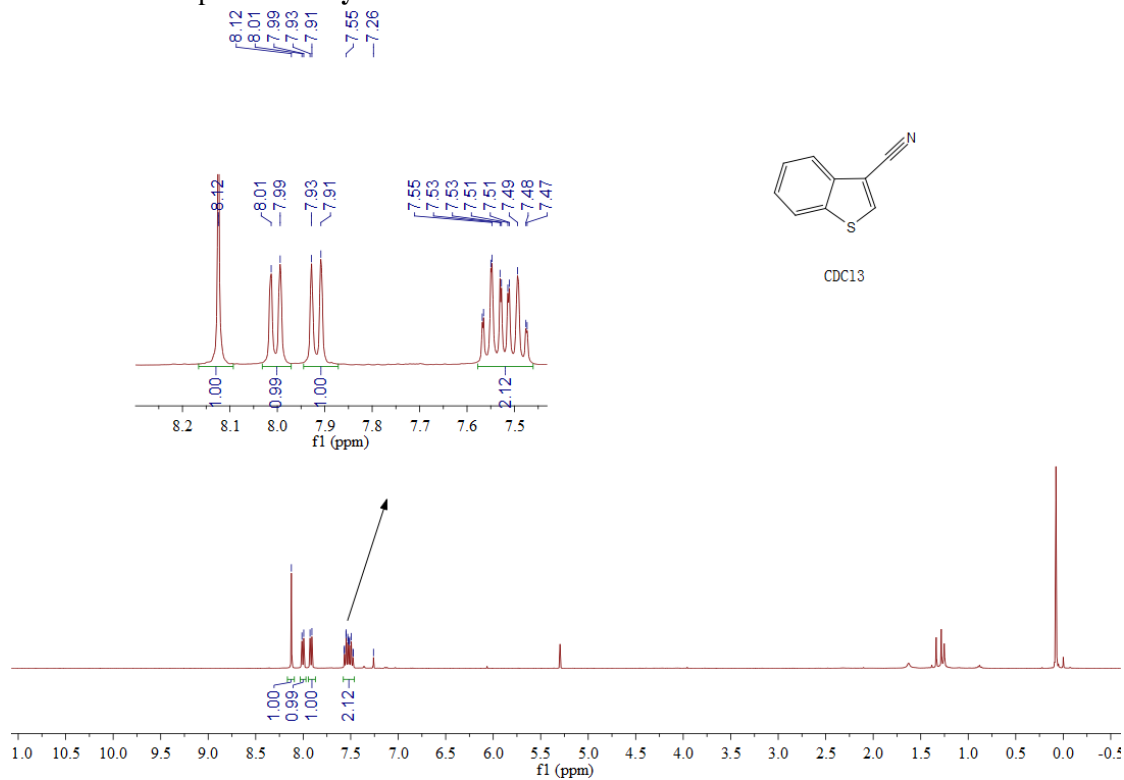

<sup>13</sup>C-NMR spectrum of **2y**

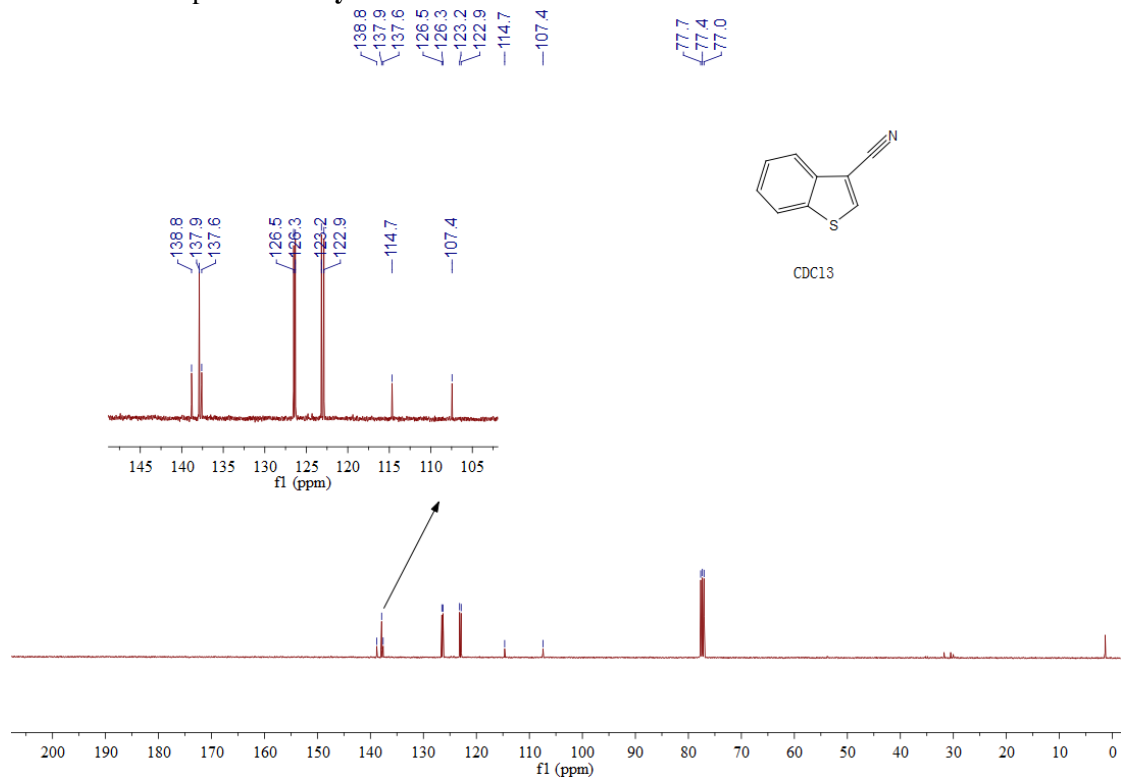

<sup>1</sup>H-NMR spectrum of **2z**

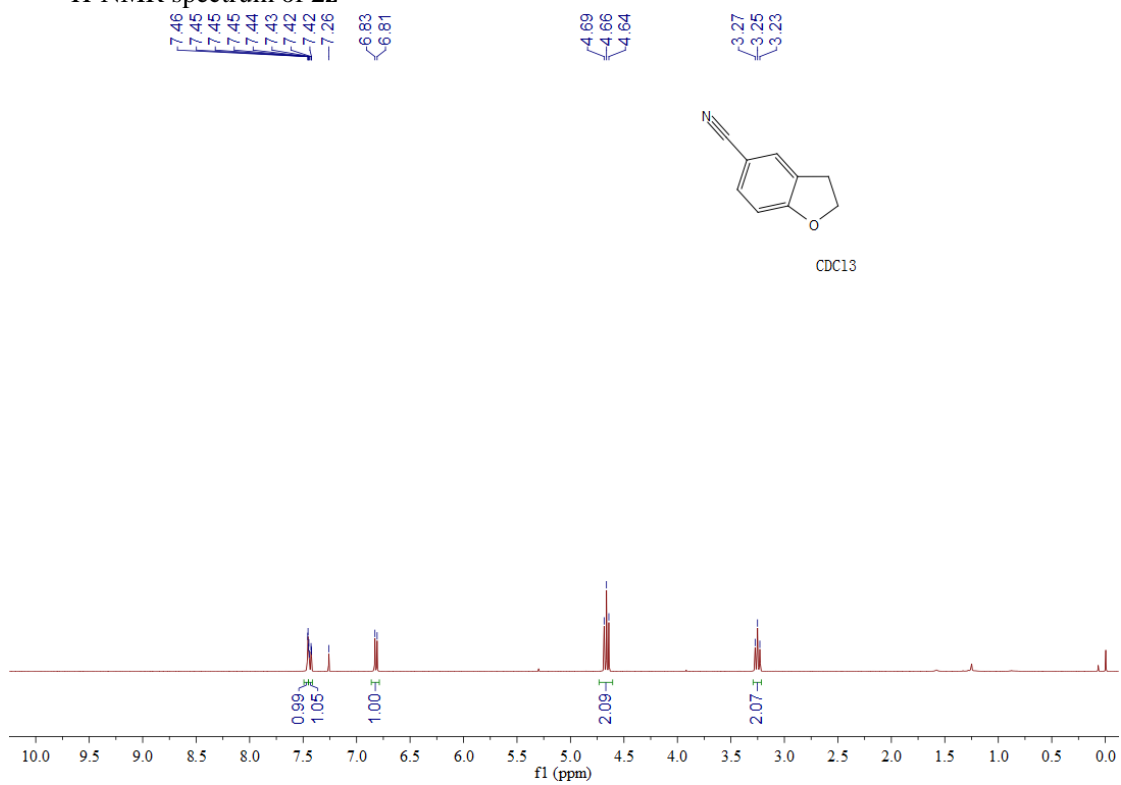

<sup>13</sup>C-NMR spectrum of **2z**

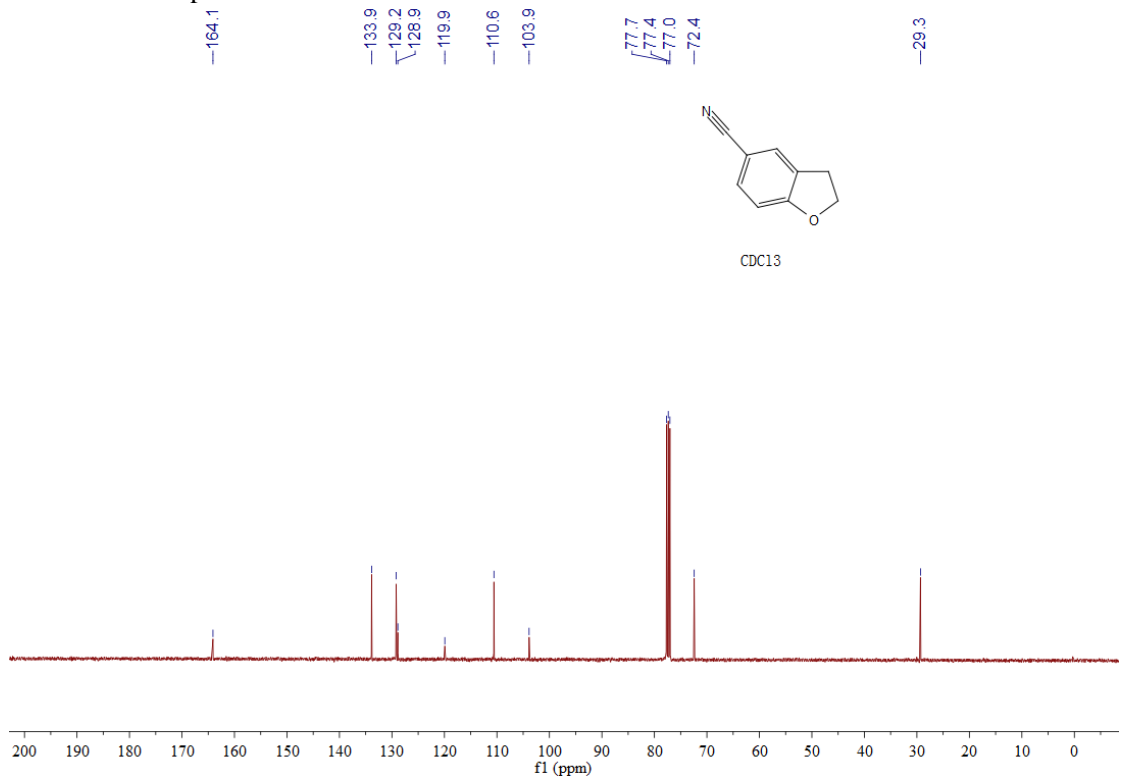

<sup>1</sup>H-NMR spectrum of **2A**

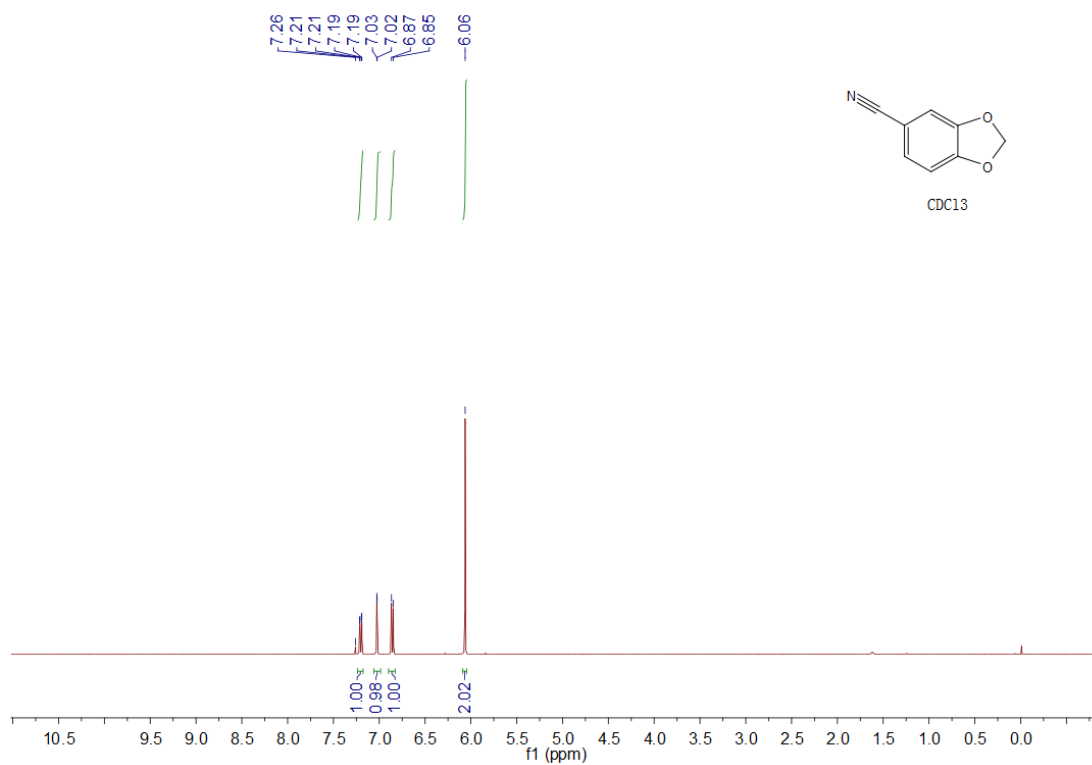

<sup>13</sup>C-NMR spectrum of **2A**

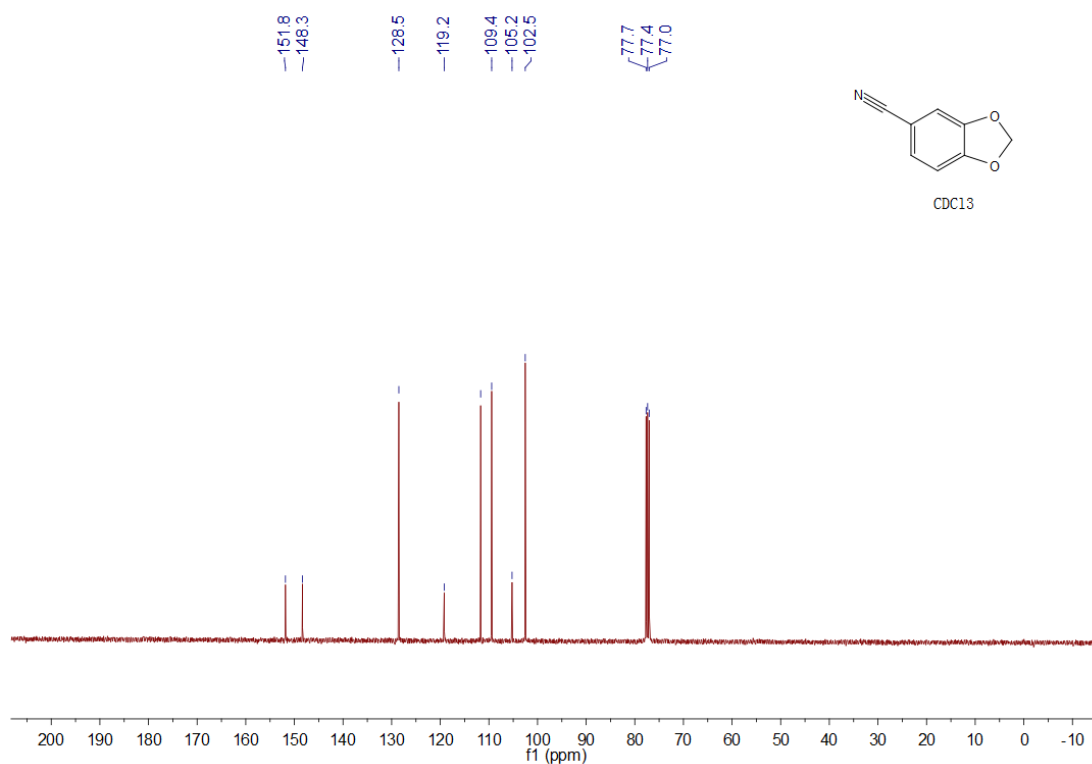



<sup>1</sup>H-NMR spectrum of **2B**

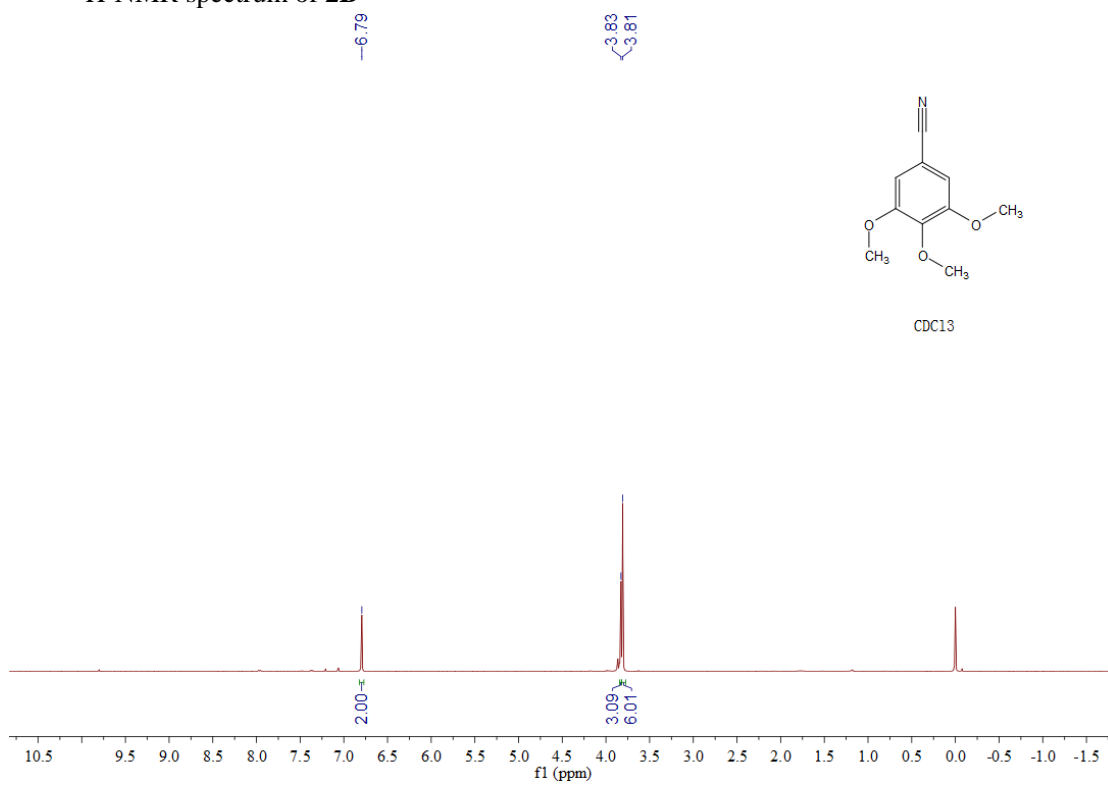

<sup>13</sup>C-NMR spectrum of **2B**

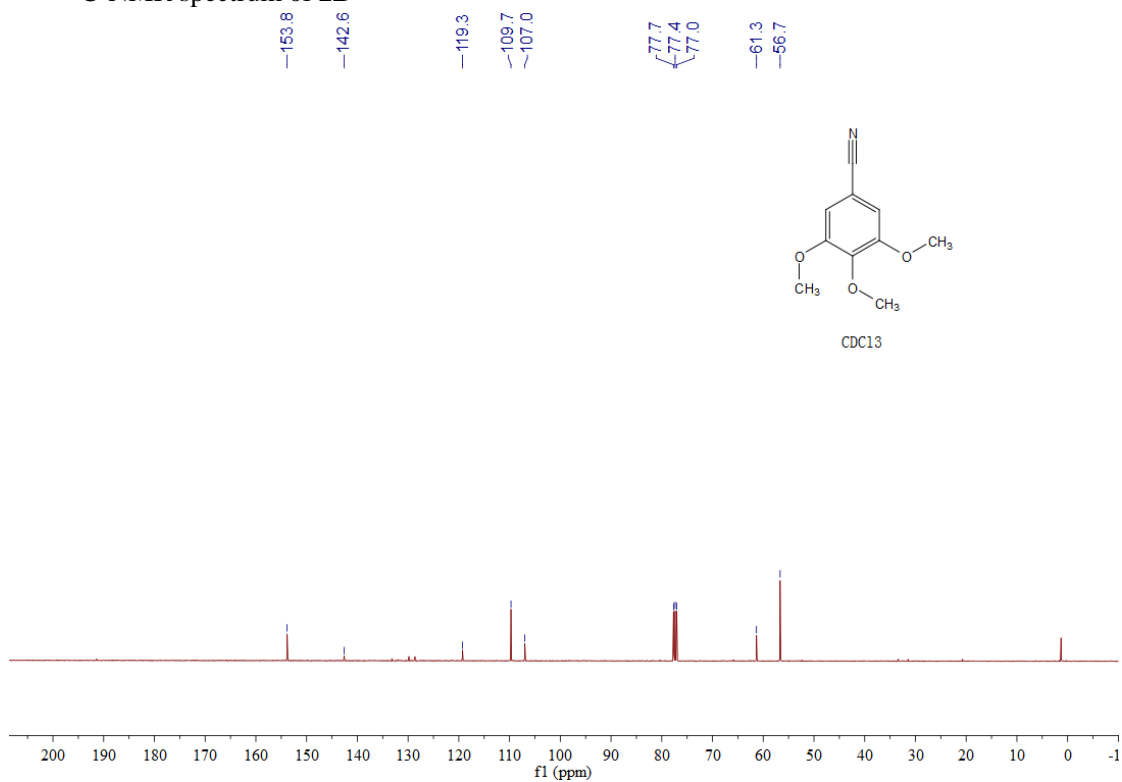

<sup>1</sup>H-NMR spectrum of **2C**

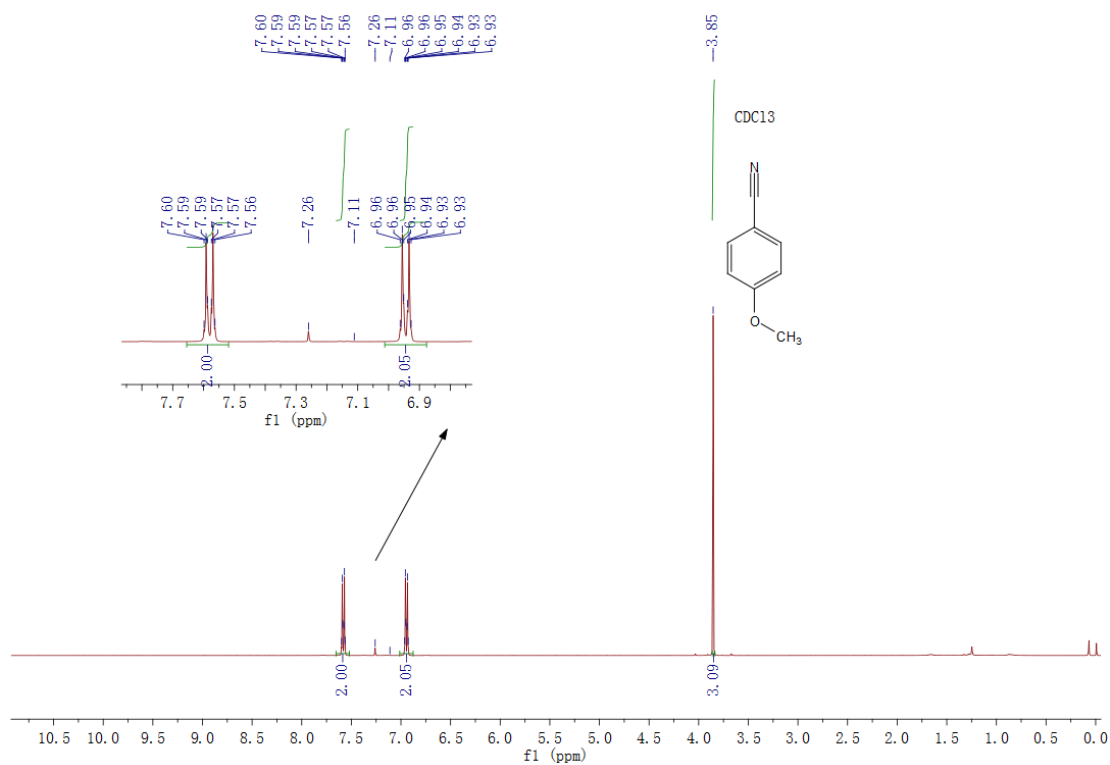

<sup>13</sup>C-NMR spectrum of **2C**

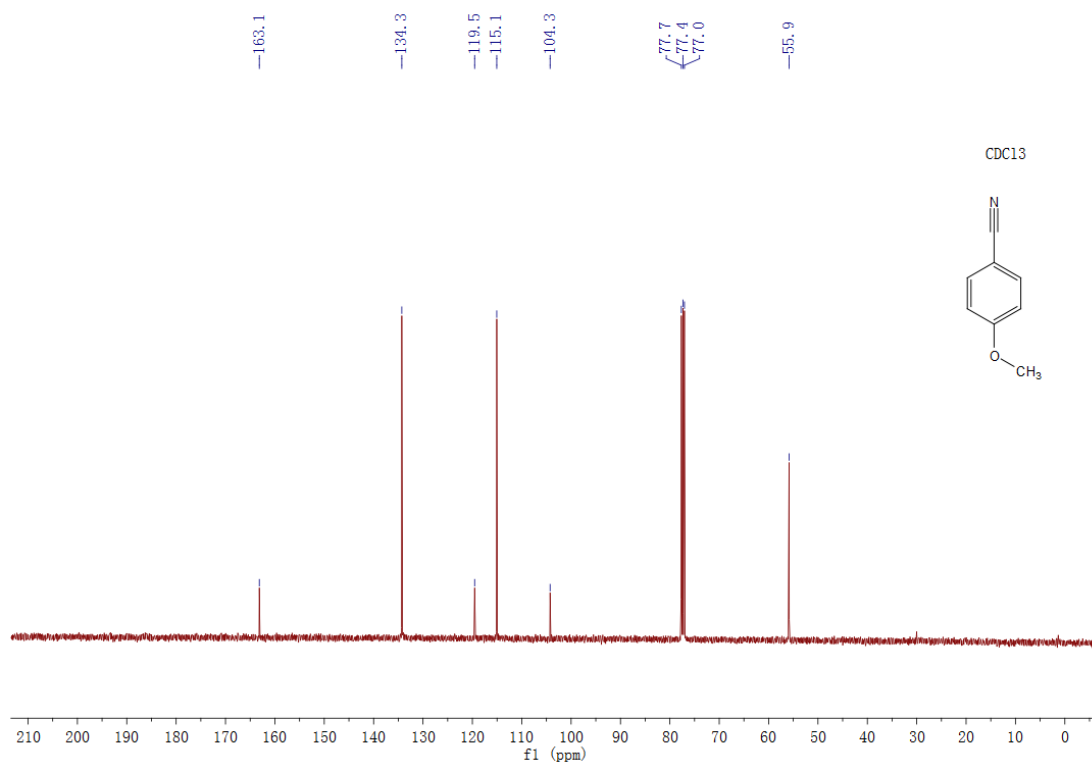

<sup>1</sup>H-NMR spectrum of **2D**

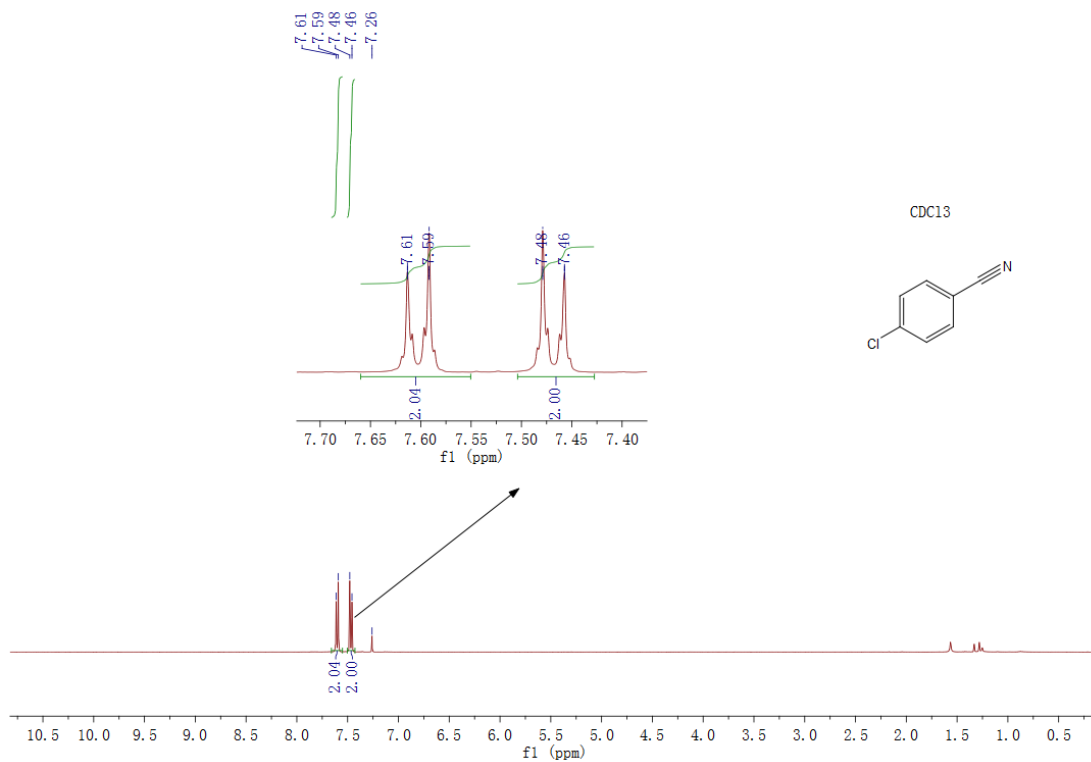

<sup>13</sup>C-NMR spectrum of **2D**

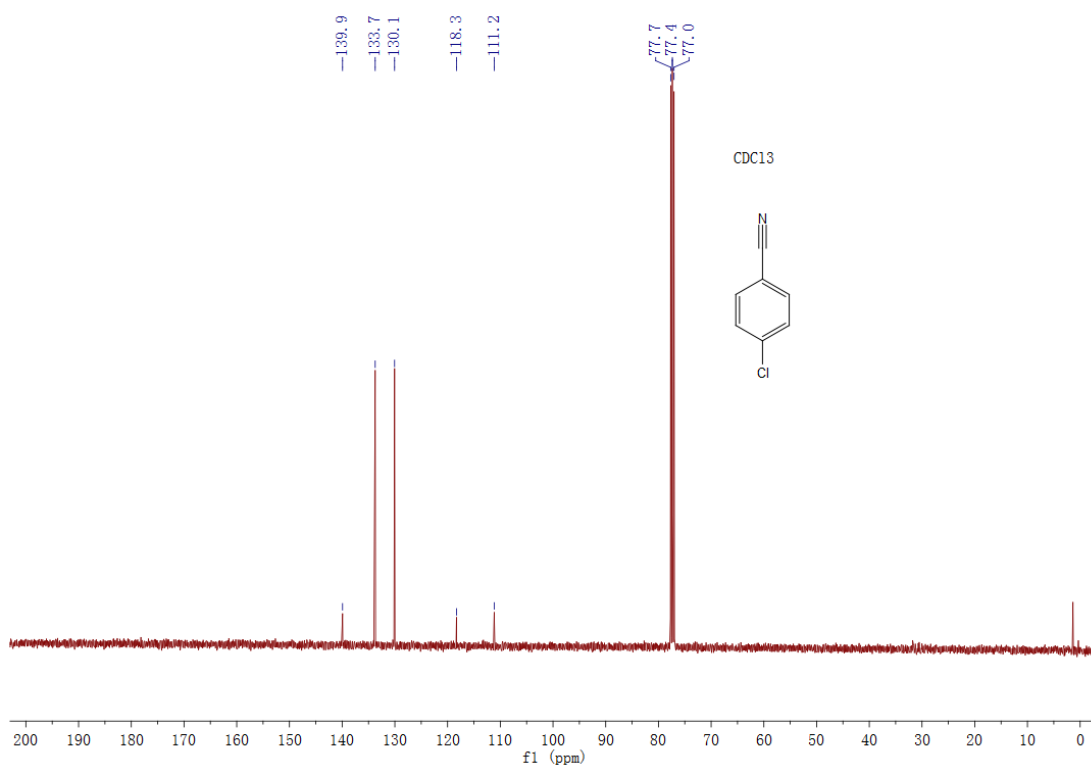

<sup>1</sup>H-NMR spectrum of **2E**

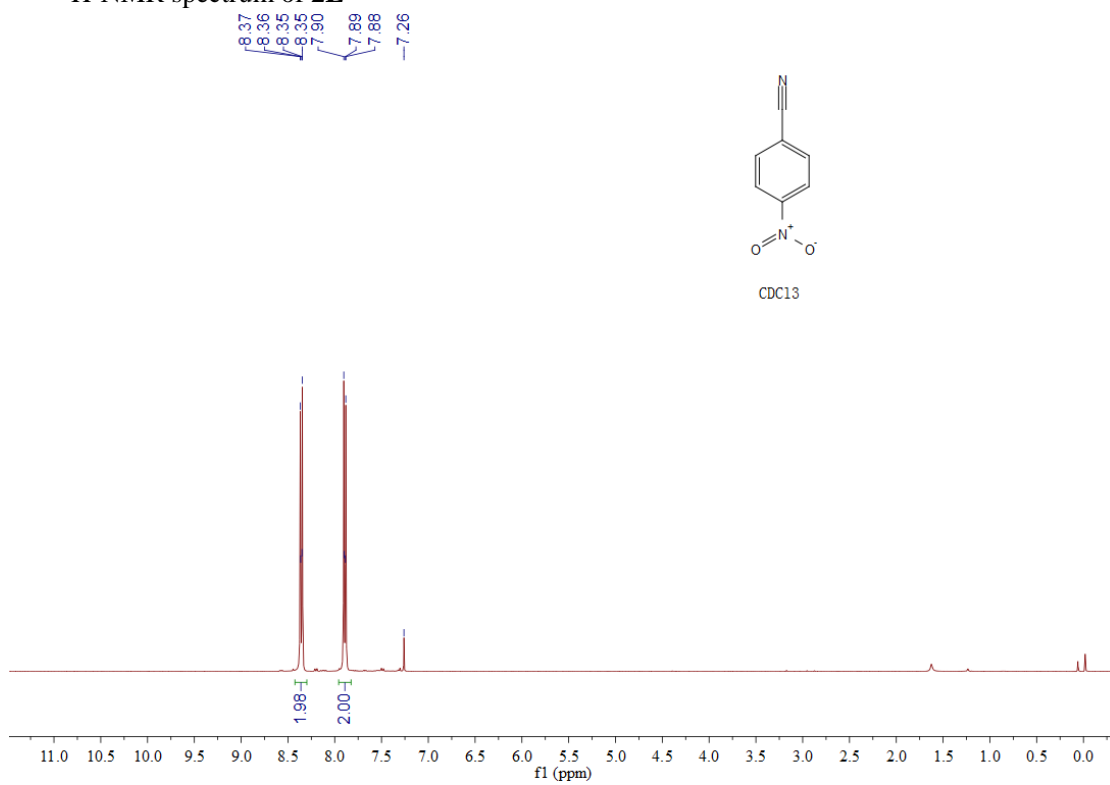

<sup>13</sup>C-NMR spectrum of **2E**

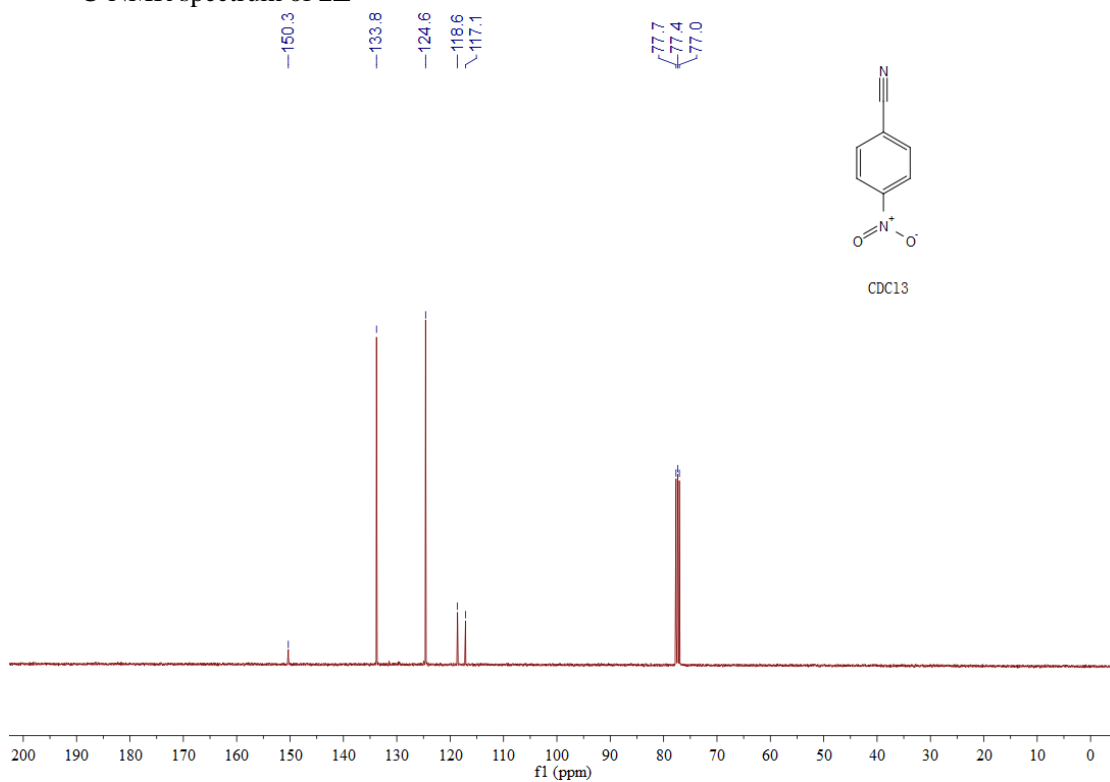

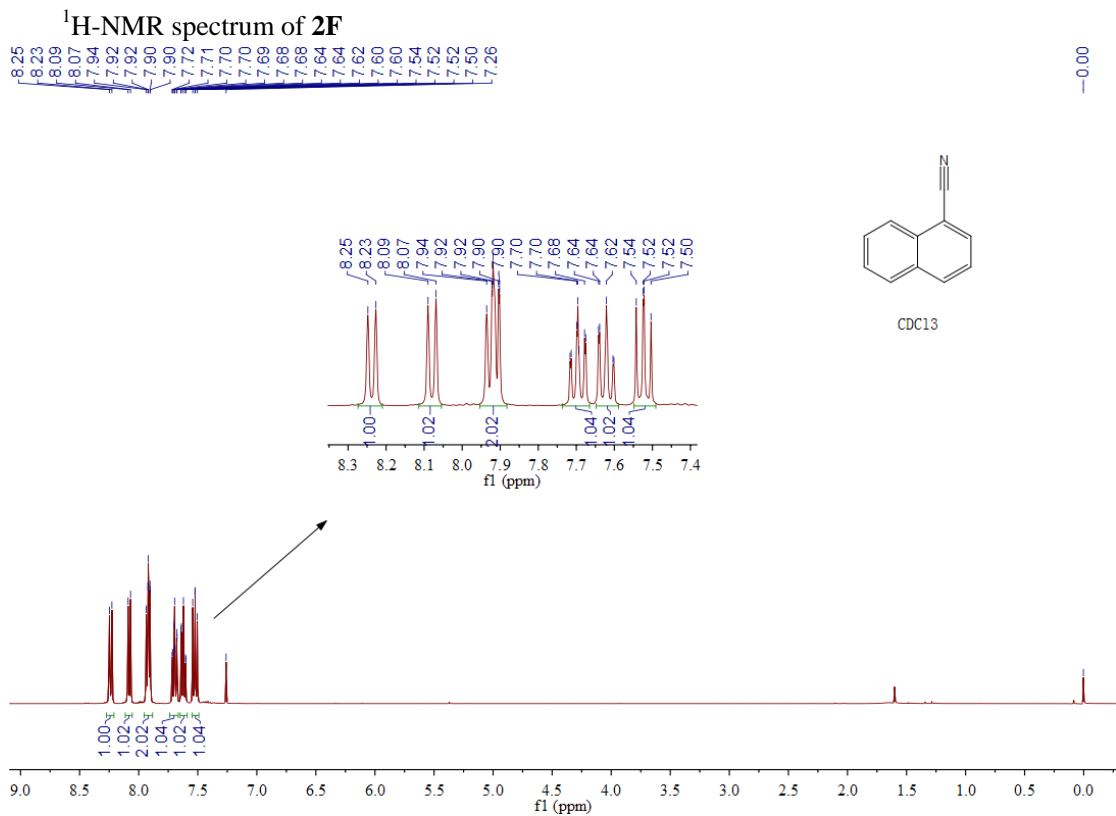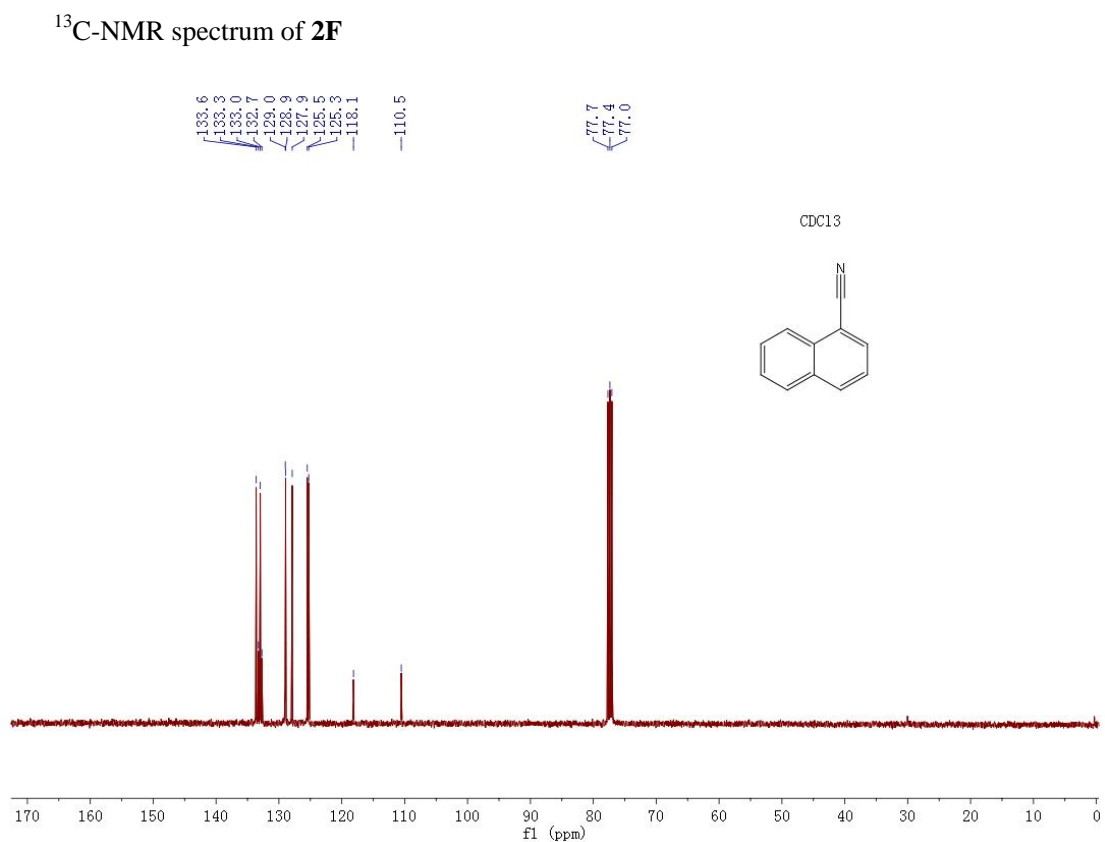

### <sup>1</sup>H-NMR spectrum of 2G

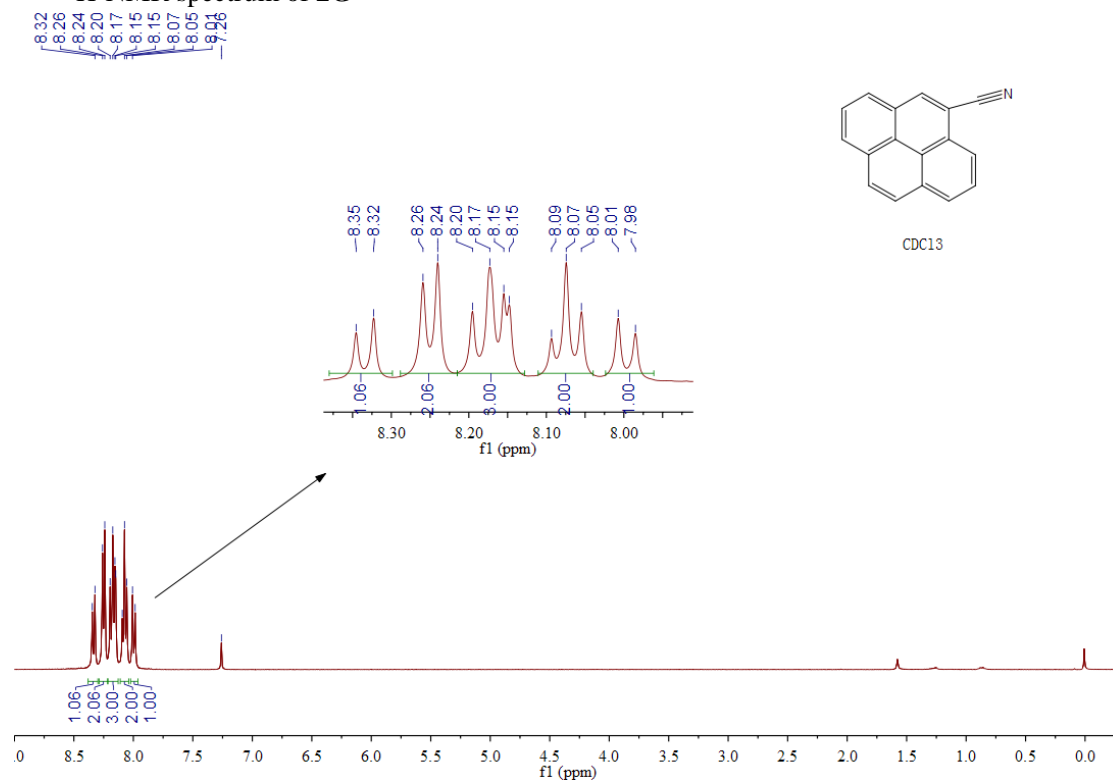

### <sup>13</sup>C-NMR spectrum of 2G

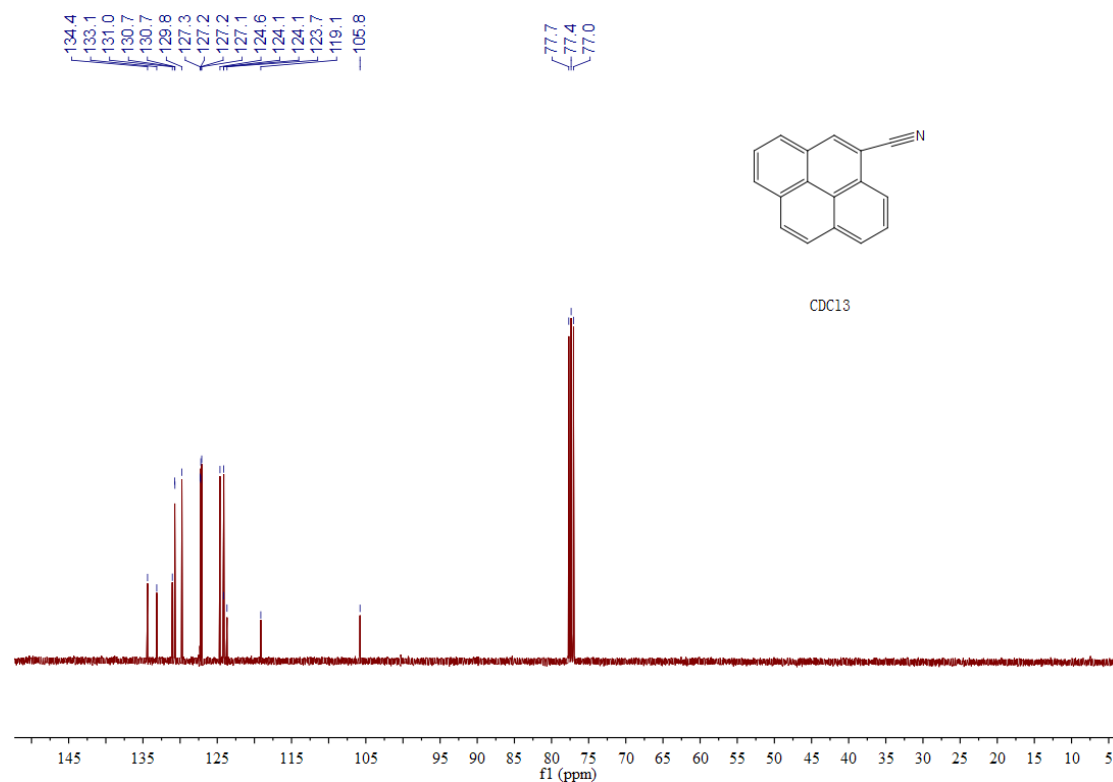

<sup>1</sup>H-NMR spectrum of **5a**

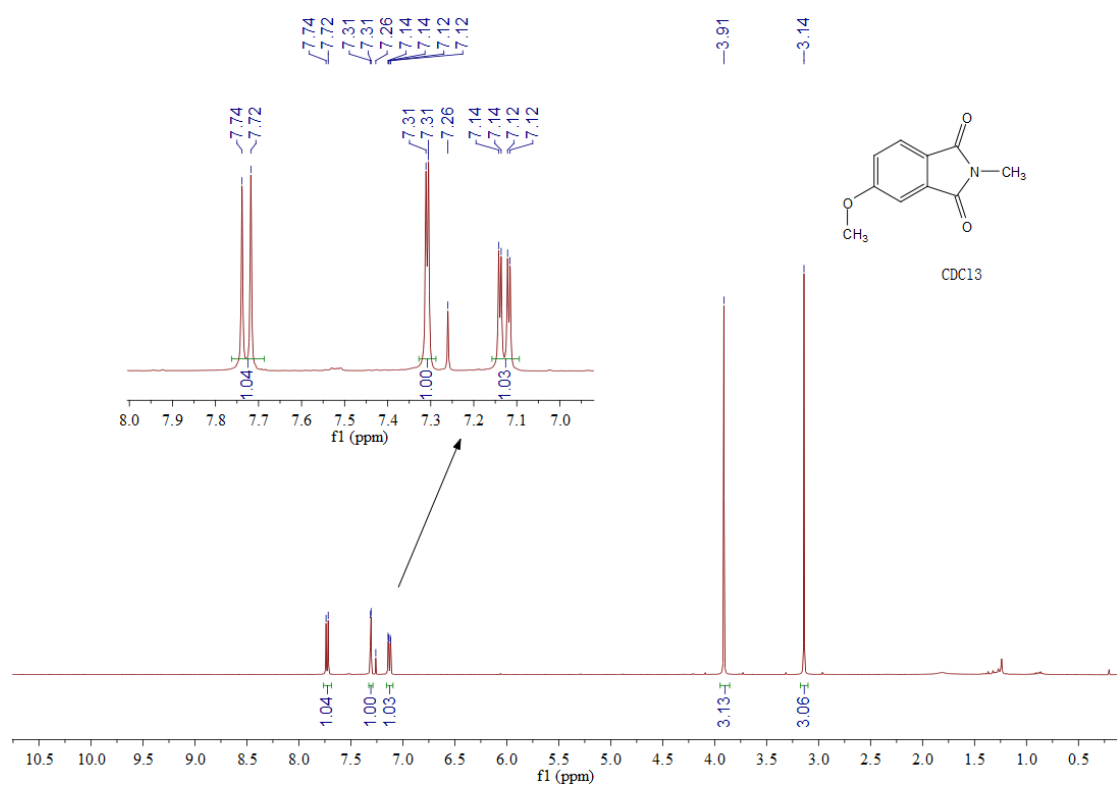

<sup>13</sup>C-NMR spectrum of **5a**

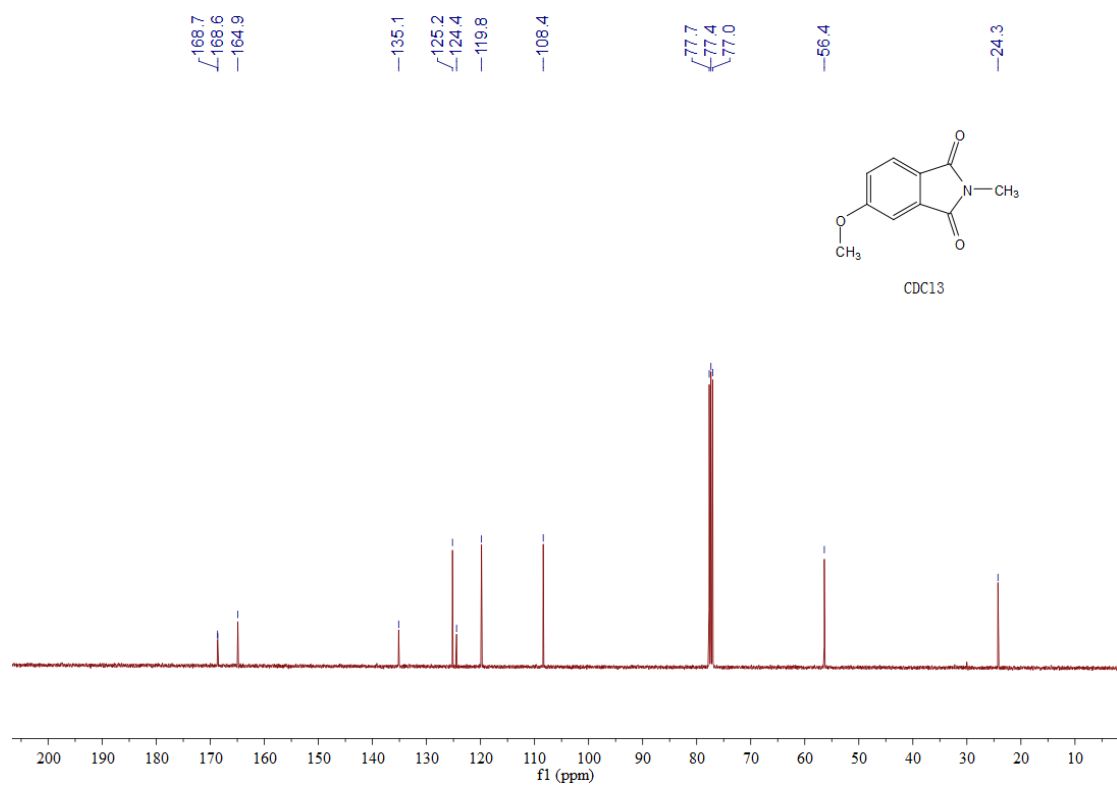

<sup>1</sup>H-NMR spectrum of **5b**

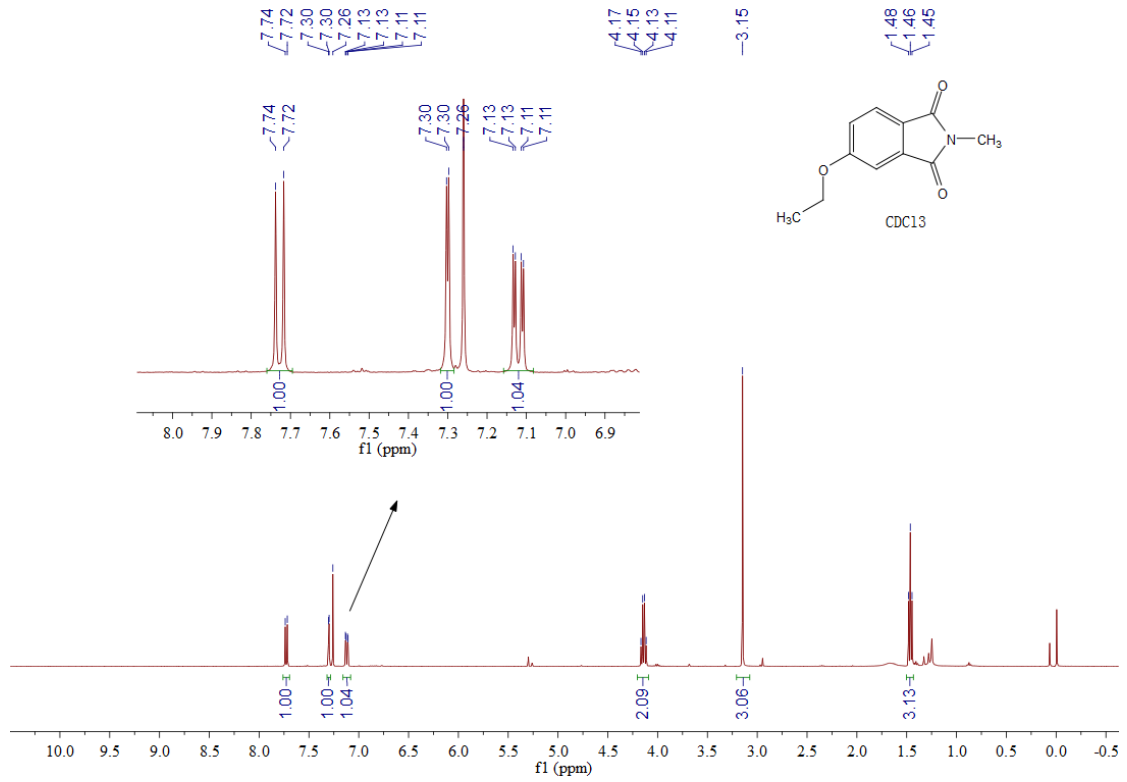

<sup>13</sup>C-NMR spectrum of **5b**

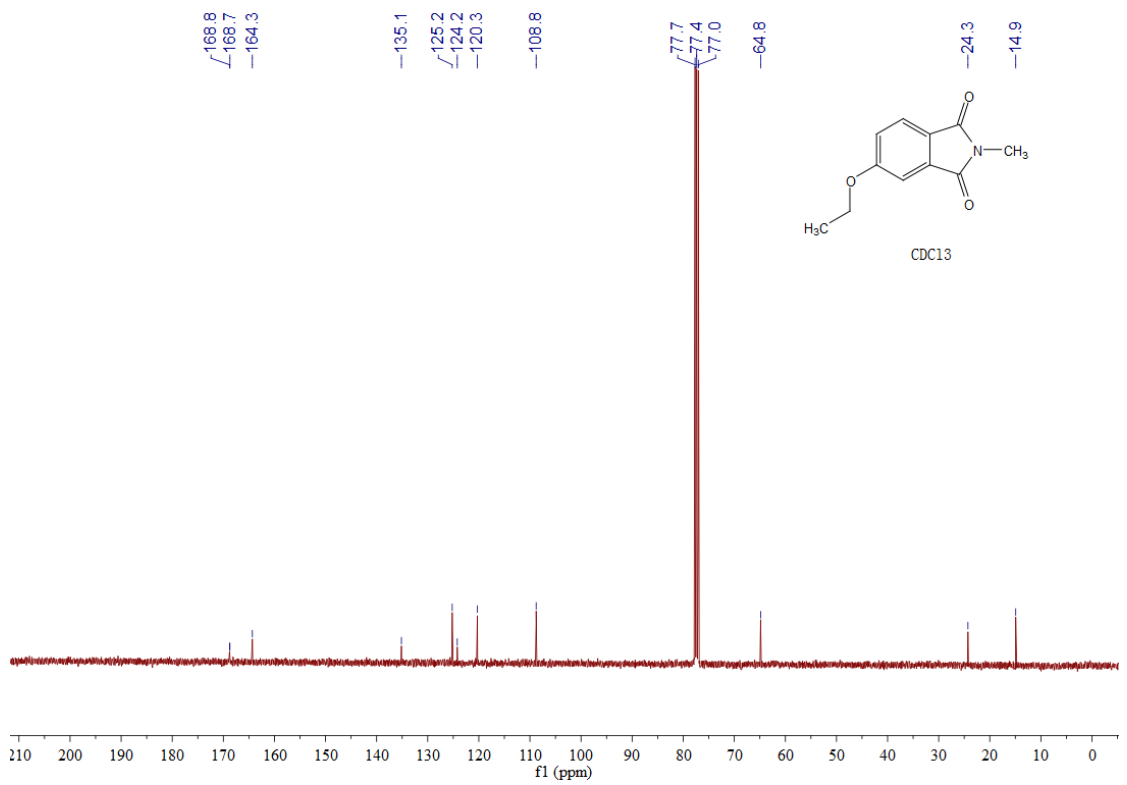



<sup>1</sup>H-NMR spectrum of **5c**

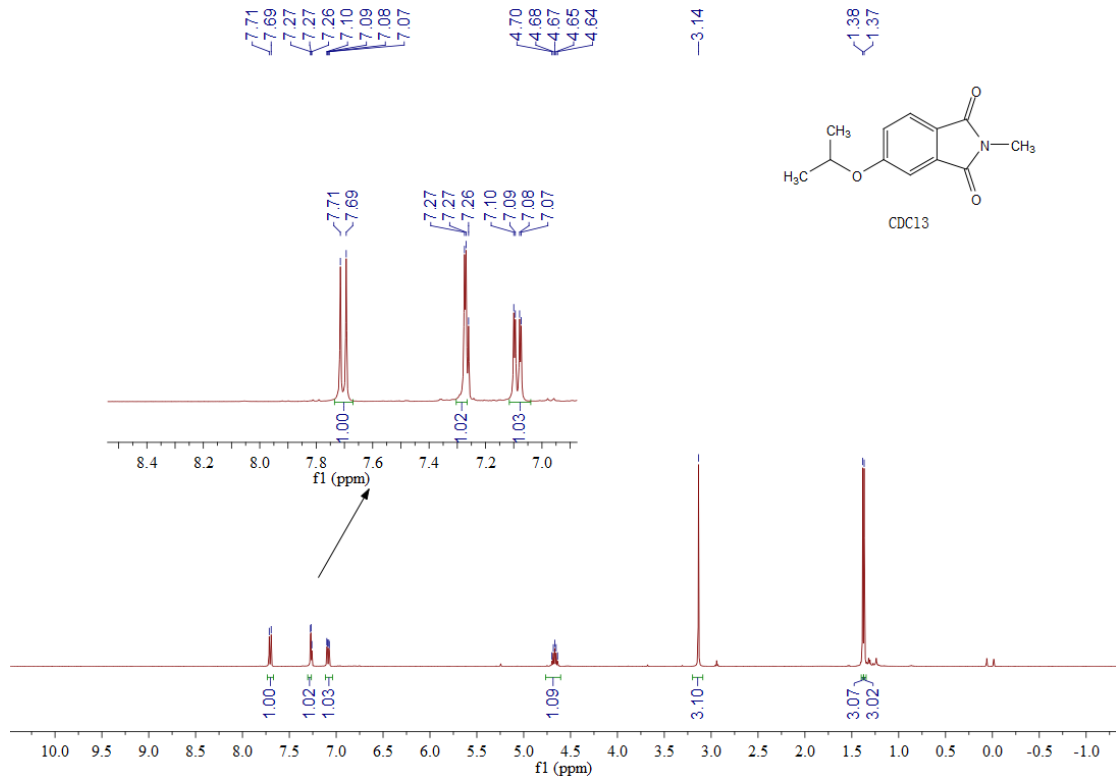

<sup>13</sup>C-NMR spectrum of **5c**

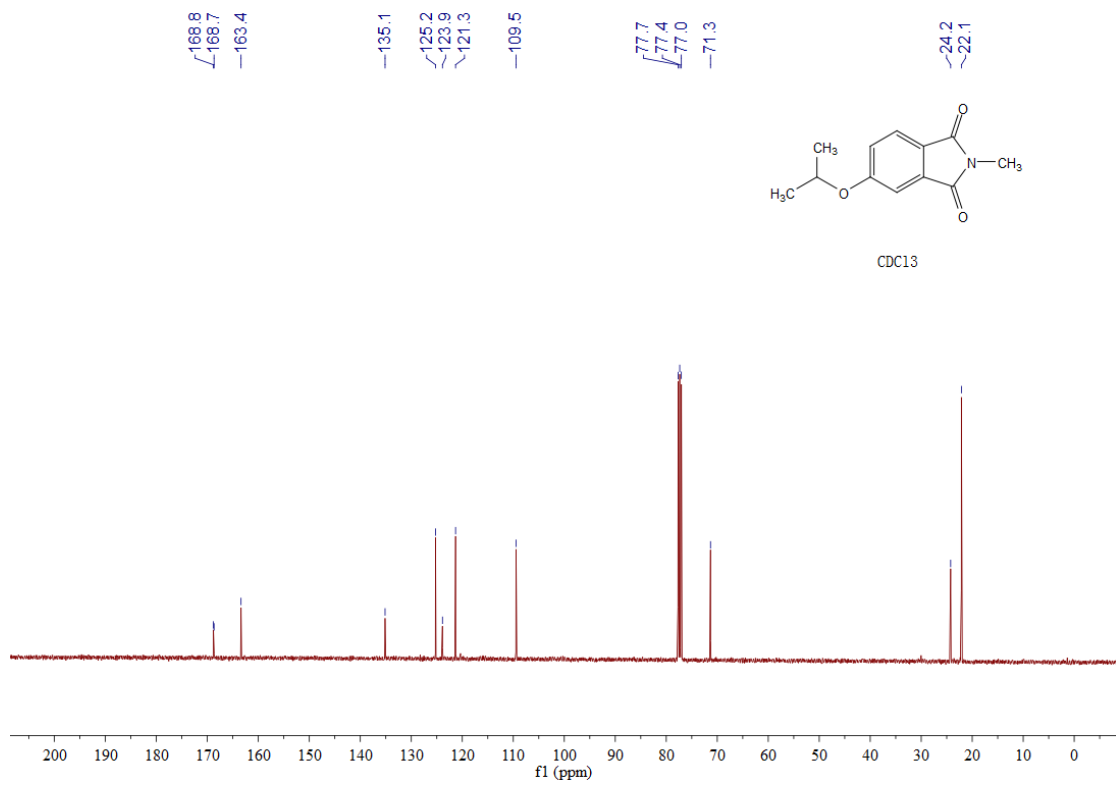

<sup>1</sup>H-NMR spectrum of **5d**

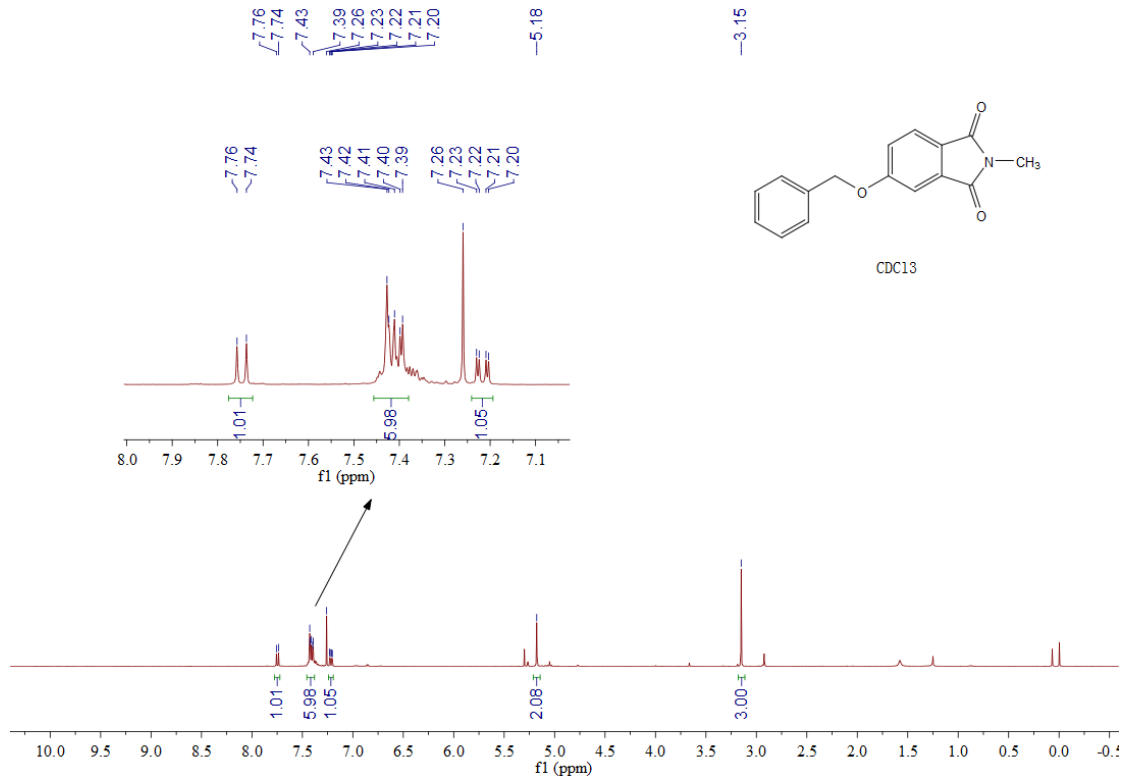

<sup>13</sup>C-NMR spectrum of **5d**

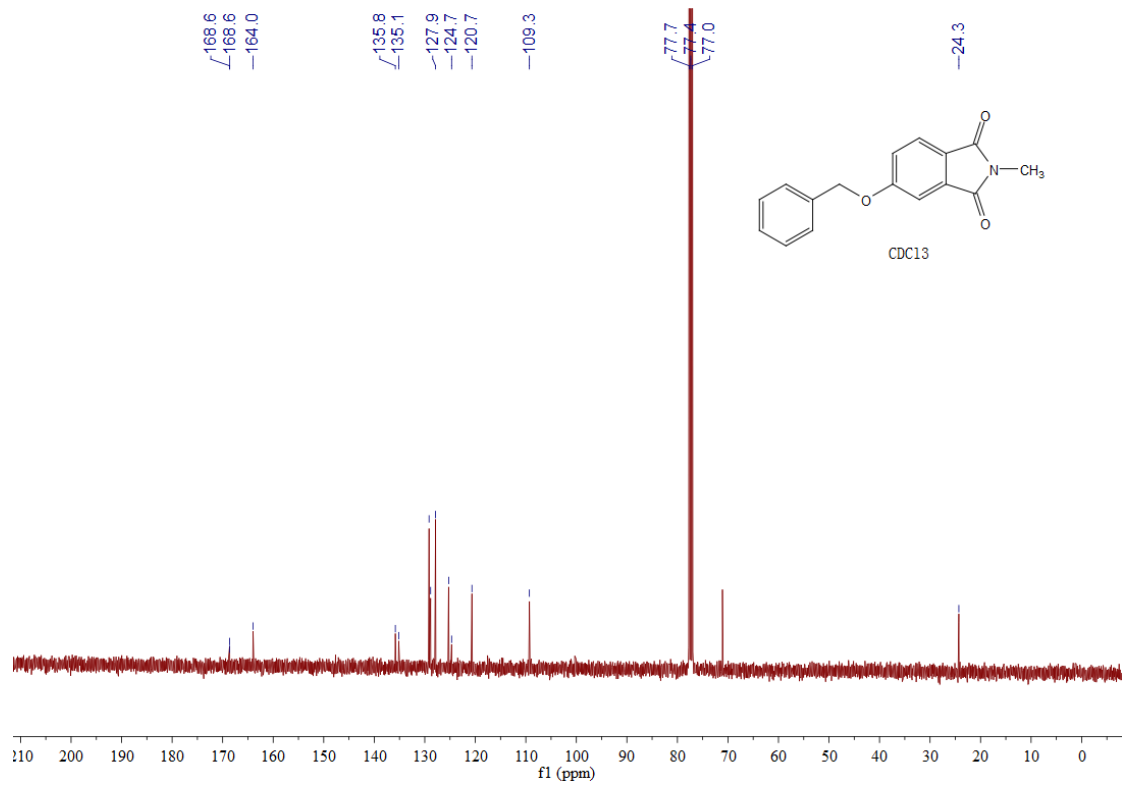

<sup>1</sup>H-NMR spectrum of A

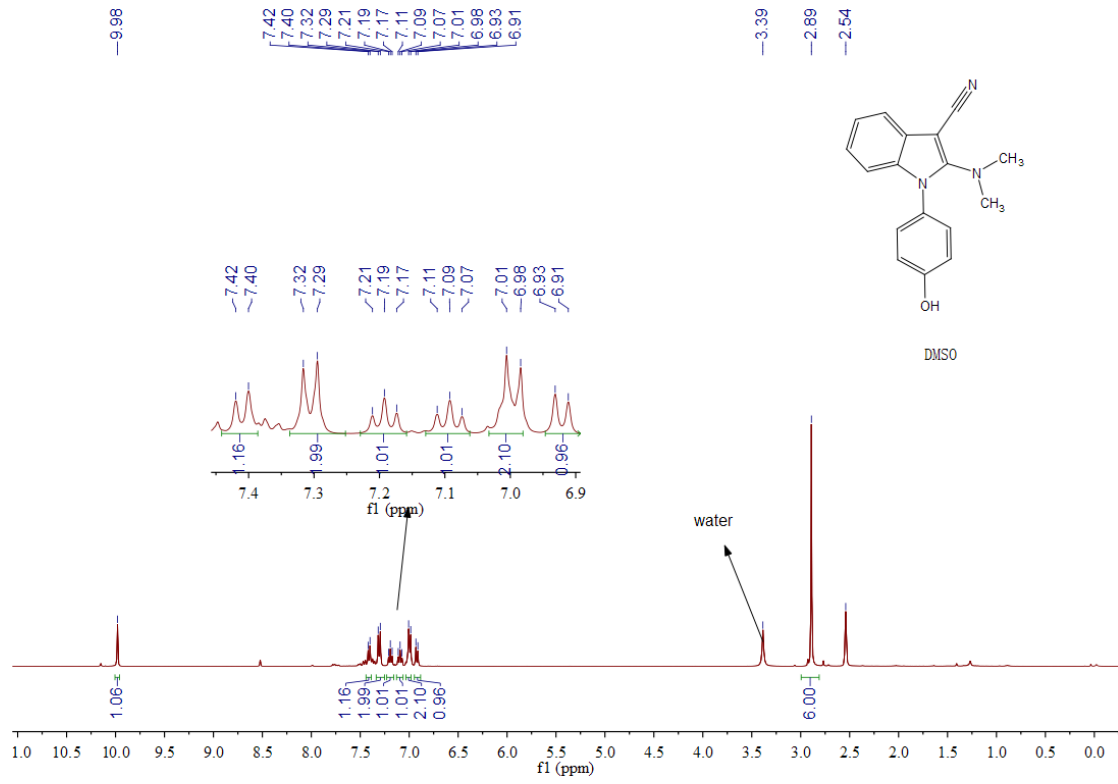

## 7. Copies of HRMS for 2l, 2q, 2t, 5c and 5d

### HRMS for 2l

#### Elemental Composition Report

Page 1

Tolerance = 1.0 mDa / DBE: min = -1.5, max = 50.0  
Element prediction: Off

Monoisotopic Mass, Odd and Even Electron Ions  
126 formula(e) evaluated with 1 results within limits (up to 70 best isotopic matches for each mass)

Elements Used:

C: 0-50 H: 0-100 N: 0-5 O: 0-5 Cl: 1-2

GCT Premier ZJU

TOF MS EI+

23-Apr-2015

zip2l 524 (2.874)

2.58e+003

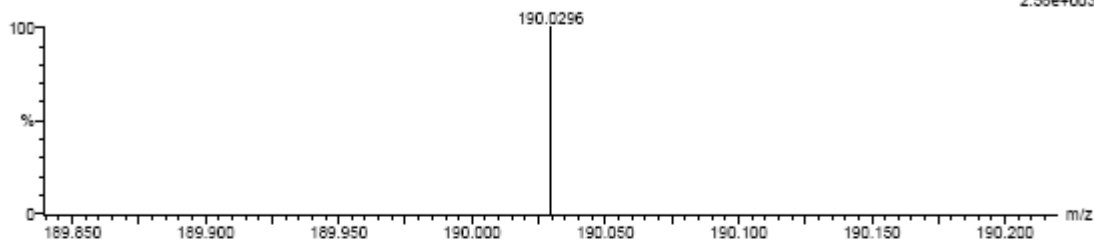

|          |            |      |      |      |           |              |
|----------|------------|------|------|------|-----------|--------------|
| Minimum: |            |      |      | -1.5 |           |              |
| Maximum: | 1.0        | 10.0 |      | 50.0 |           |              |
| Mass     | Calc. Mass | mDa  | PPM  | DBE  | i-FIT     | Formula      |
| 190.0296 | 190.0298   | -0.2 | -1.1 | 8.0  | 5547306.0 | C10 H7 N2 Cl |

# HRMS for 2q

## Elemental Composition Report

Page 1

Tolerance = 1.0 mDa / DBE: min = -1.5, max = 50.0  
Element prediction: Off

Monoisotopic Mass, Odd and Even Electron Ions  
87 formula(e) evaluated with 1 results within limits (up to 70 best isotopic matches for each mass)

Elements Used:

C: 0-50 H: 0-100 N: 0-5 O: 0-5

GCT Premier ZJU

TOF MS EI+

23-Apr-2015

zlp9964 402 (2.427)

9.23e+002

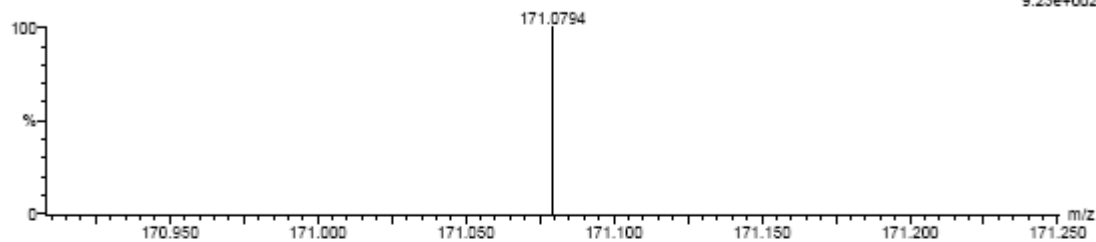

|          |            |      |      |      |           |           |
|----------|------------|------|------|------|-----------|-----------|
| Minimum: |            |      |      | -1.5 |           |           |
| Maximum: | 1.0        | 10.0 |      | 50.0 |           |           |
| Mass     | Calc. Mass | mDa  | PPM  | DBE  | i-FIT     | Formula   |
| 171.0794 | 171.0796   | -0.2 | -1.2 | 8.0  | 5546448.5 | C10 H9 N3 |

# HRMS for 2t

## Elemental Composition Report

Page 1

Tolerance = 0.5 mDa / DBE: min = -1.5, max = 50.0  
Element prediction: Off

Monoisotopic Mass, Odd and Even Electron Ions  
51 formula(e) evaluated with 1 results within limits (up to 50 best isotopic matches for each mass)  
Elements Used:  
C: 0-500 H: 0-1000 N: 0-3 O: 0-3  
zip457-2 94 (1.724)  
TOF MS EI+

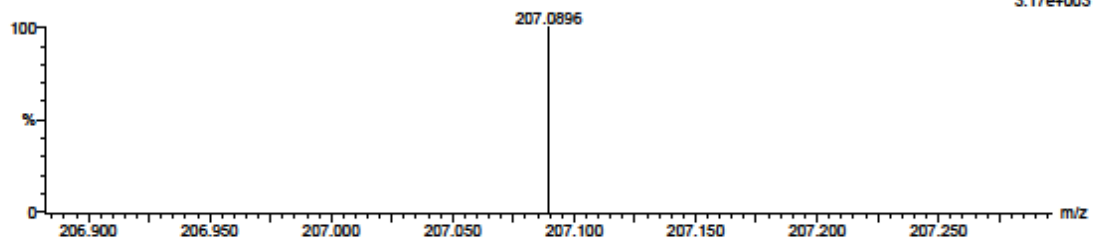

|          |            |     |      |      |           |              |
|----------|------------|-----|------|------|-----------|--------------|
| Minimum: |            |     |      | -1.5 |           |              |
| Maximum: |            | 0.5 | 10.0 | 50.0 |           |              |
| Mass     | Calc. Mass | mDa | PPM  | DBE  | i-FIT     | Formula      |
| 207.0896 | 207.0895   | 0.1 | 0.5  | 6.0  | 5547571.5 | C11 H13 N O3 |

# HRMS for 5c

## Elemental Composition Report

Page 1

Tolerance = 1.0 mDa / DBE: min = -1.5, max = 50.0  
Element prediction: Off

Monoisotopic Mass, Odd and Even Electron Ions  
105 formula(e) evaluated with 1 results within limits (up to 70 best isotopic matches for each mass)

Elements Used:

C: 0-50 H: 0-100 N: 0-5 O: 0-5

GCT Premier ZJU

TOF MS EI+

23-Apr-2015

zlp9955-2 251 (1.873)

9.02e+002

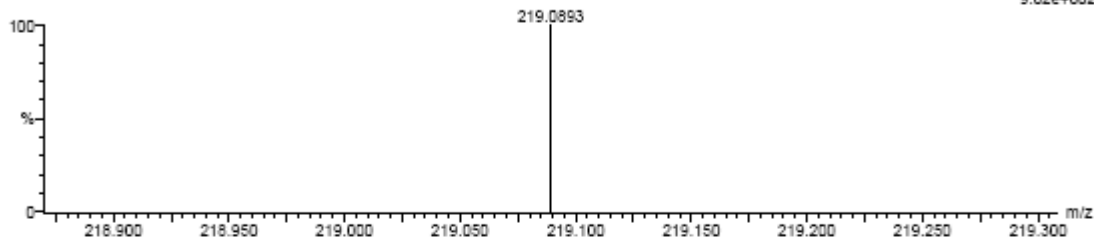

|          |            |      |      |      |           |              |
|----------|------------|------|------|------|-----------|--------------|
| Minimum: |            |      |      | -1.5 |           |              |
| Maximum: | 1.0        | 10.0 |      | 50.0 |           |              |
| Mass     | Calc. Mass | mDa  | PPM  | DBE  | i-FIT     | Formula      |
| 219.0893 | 219.0895   | -0.2 | -0.9 | 7.0  | 5546445.0 | C12 H13 N OS |

# HRMS for 5d

## Elemental Composition Report

Page 1

Tolerance = 1.0 mDa / DBE: min = -1.5, max = 50.0  
Element prediction: Off

Monoisotopic Mass, Odd and Even Electron Ions  
128 formula(e) evaluated with 1 results within limits (up to 70 best isotopic matches for each mass)

Elements Used:

C: 0-50 H: 0-100 N: 0-5 O: 0-5

GCT Premier ZJU

TOF MS EI+

23-Apr-2015

zip9938-3 597 (3.142) Cm (591:629)

3.57e+003

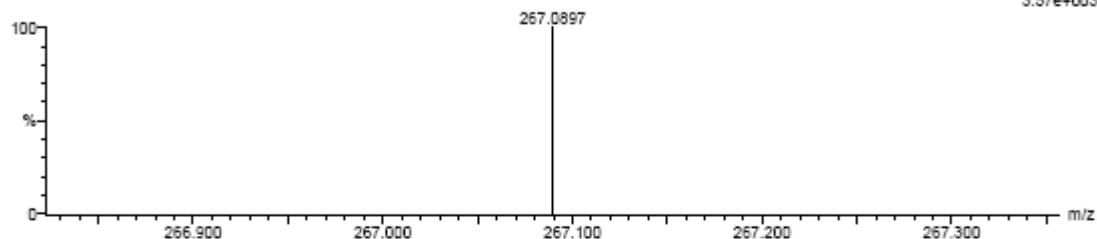

|          |            |      |     |      |           |              |
|----------|------------|------|-----|------|-----------|--------------|
| Minimum: |            |      |     | -1.5 |           |              |
| Maximum: | 1.0        | 10.0 |     | 50.0 |           |              |
| Mass     | Calc. Mass | mDa  | PPM | DBE  | i-FIT     | Formula      |
| 267.0897 | 267.0895   | 0.2  | 0.7 | 11.0 | 5547788.0 | C16 H13 N OS |
